# Supplementary material for: Identification and comparative expression analysis of odorant binding protein genes in the tobacco cutworm Spodoptera litura
Source: PubMed Central journal article supplement (PMC4561897; doi:10.1038/srep13800), 2015-09-08
Supplement: srep13800-s1.pdf [file srep13800-s1.pdf]

Supplementary Information for

**Identification and comparative expression analysis of odorant binding protein genes in the tobacco cutworm *Spodoptera litura***

Shao-Hua Gu<sup>1</sup>, Jing-Jiang Zhou<sup>2</sup>, Shang Gao<sup>1,3</sup>, Da-Hai Wang<sup>5</sup>, Xian-Chun Li<sup>1,4</sup>, Yu-Yuan Guo<sup>1</sup>, Yong-Jun Zhang<sup>1,\*</sup>

<sup>1</sup>State Key Laboratory for Biology of Plant Diseases and Insect Pests, Institute of Plant Protection, Chinese Academy of Agricultural Sciences, Beijing, China.

<sup>2</sup>Department of Biological Chemistry and Crop Protection, Rothamsted Research, Harpenden, UK.

<sup>3</sup>Education Ministry Key Laboratory of Integrated Management of Crop Diseases and Pests, College of Plant Protection, Nanjing Agricultural University, Nanjing, China.

<sup>4</sup>Department of Entomology and BIO5 Institute, University of Arizona, Tucson, AZ 85721 USA

<sup>5</sup>Beijing Autolab Biotechnology Company, Beijing, China.

\*Corresponding author

Yong-Jun Zhang, PhD. State Key Laboratory for Biology of Plant Diseases and Insect Pests, Institute of Plant Protection, Chinese Academy of Agricultural Sciences, Beijing, 100193, China.

Email: [yjzhang@ippcaas.cn](mailto:yjzhang@ippcaas.cn); Tel.: +86 10 62815929; Fax: +86 10 62894786.

## **Supplementary Figures**

**Supplementary Figure 1.** The full-length gels for each SlitOBPs presented in Figure 8.

## **Supplementary Tables**

### **Supplementary Table 1.**

A percent identity matrix of the 30 full-length SlitOBPs. The calculations are based on the alignment of amino acid sequence by Vector NTI 10.2. The percentage of identity of each pair is shown.

### **Supplementary Table 2.**

A percent identity matrix of the 78 OBPs in *S. litura*, *S. littoralis* and *S. exigua*. The calculations are based on the alignment of amino acid sequence by Vector NTI 10.2. The percentage of identity of each pair is shown.

### **Supplementary Table 3.**

Gene specific primers used for molecular cloning of *S. litura* OBP genes.

### **Supplementary Table 4.**

The protein names and sequences of the 78 of OBPs from *S. litura*, *S. littoralis* and *S. exigua* used in Figure 5.

### **Supplementary Table 5.**

The protein names and sequences of the 384 OBPs and 225 CSPs used in Figure 6.

### **Supplementary Table 6.**

Primers used in RT-PCR for determination expression level of *S. litura* OBP genes.

### **Supplementary Table 7.**

Primers used in real-time PCR for determination expression level of *S. litura* OBP genes.

### **Supplementary Table 8.**

The protein names and sequences of the 193 Lepidoptera OBPs used in Figure 7.

**Supplementary Figure 1.**

**SlitPBP1**

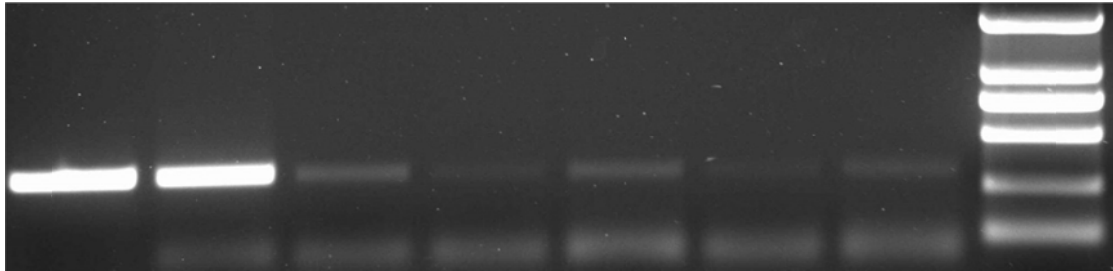

**SlitPBP2**

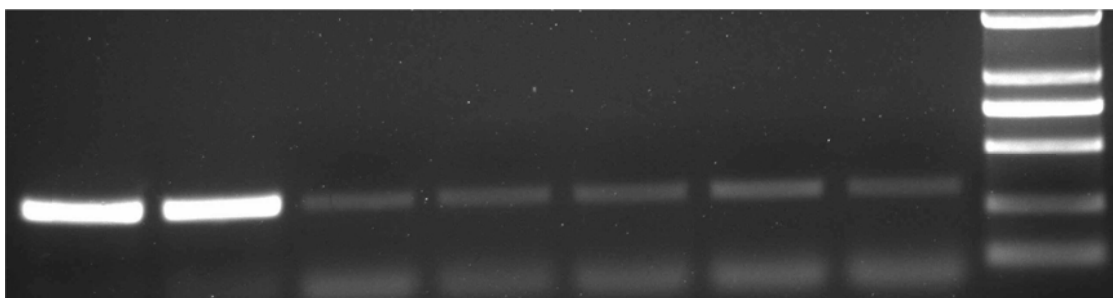

**SlitPBP3**

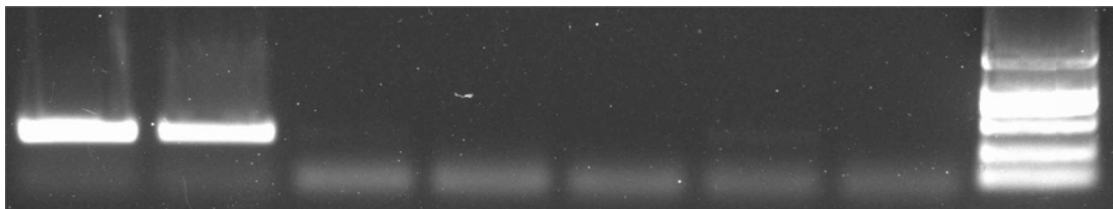

**SlitGOBP1**

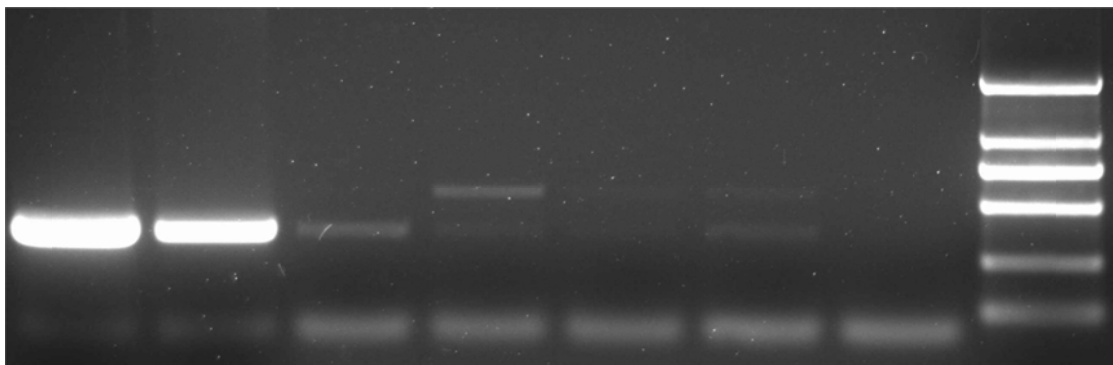

SlitGOBP2

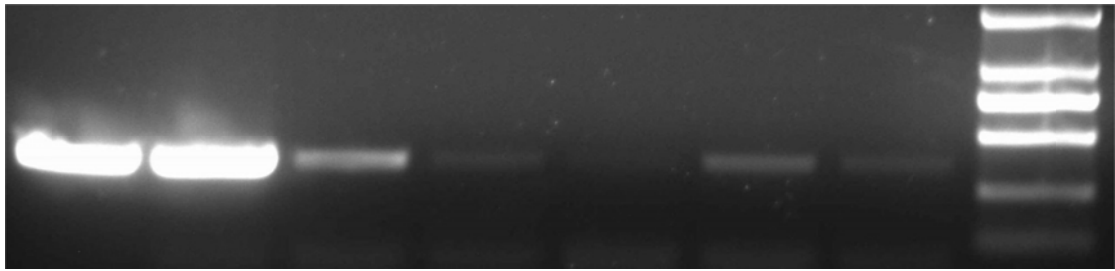

SlitOBP1

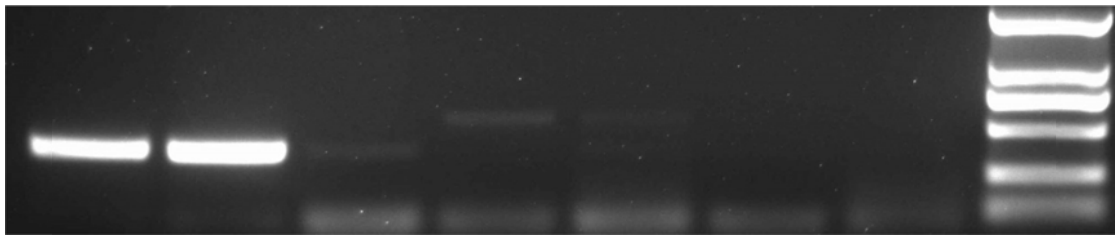

SlitOBP2

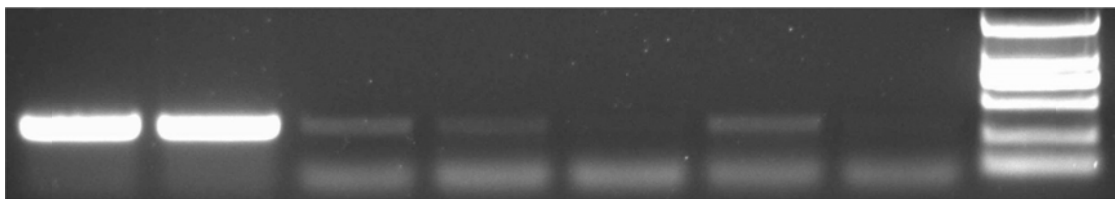

SlitOBP3

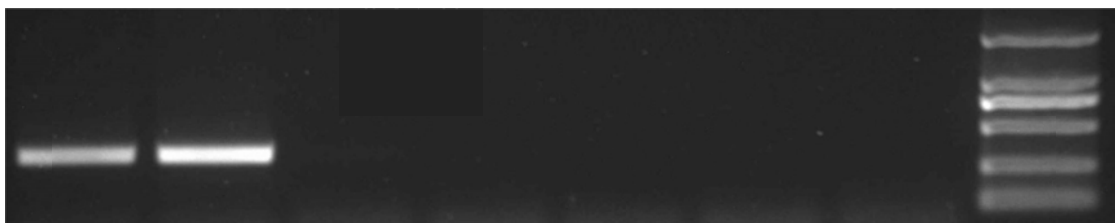

SlitOBP4

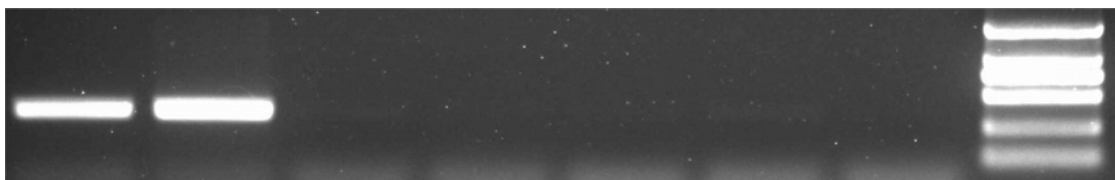

SlitOBP5

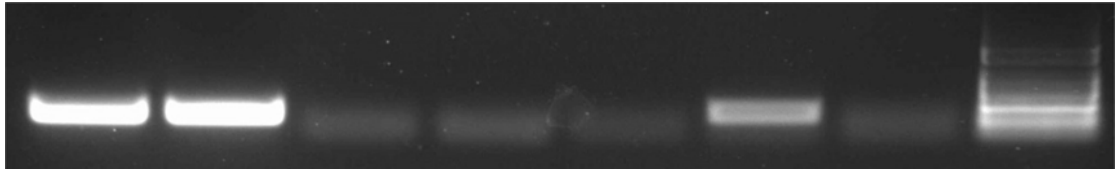

SlitOBP6

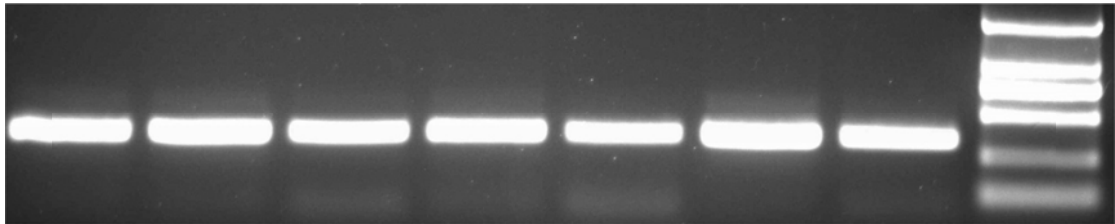

SlitOBP7

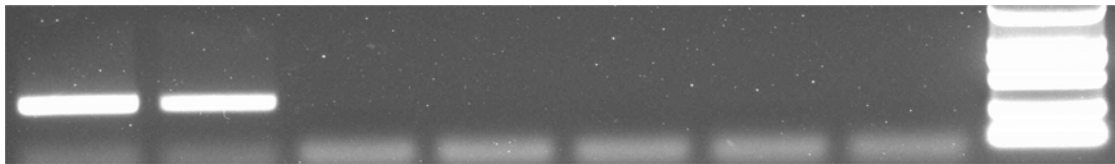

SlitOBP8

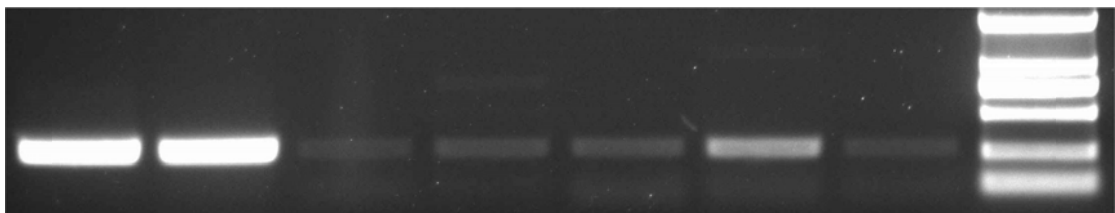

SlitOBP9

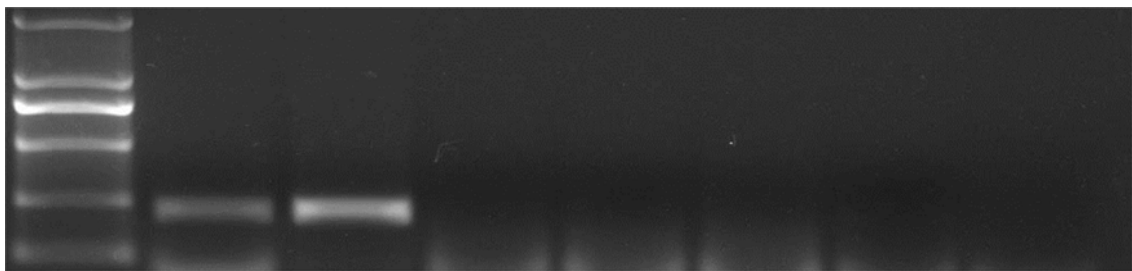

SlitOBP10

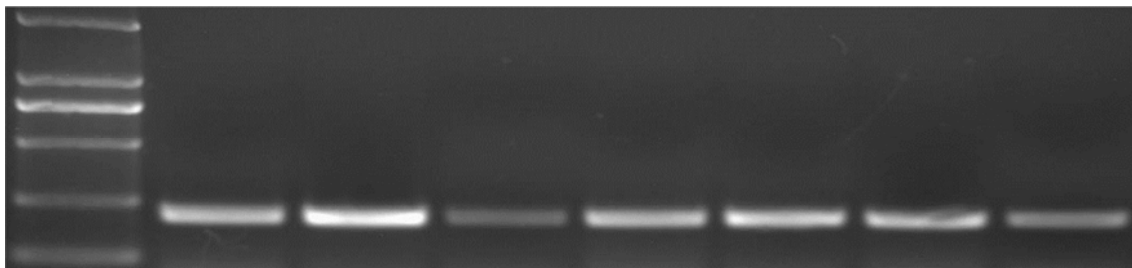

SlitOBP11

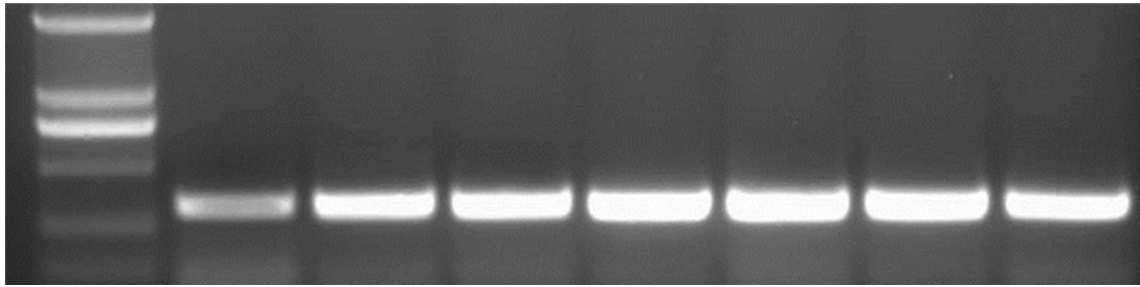

SlitOBP12

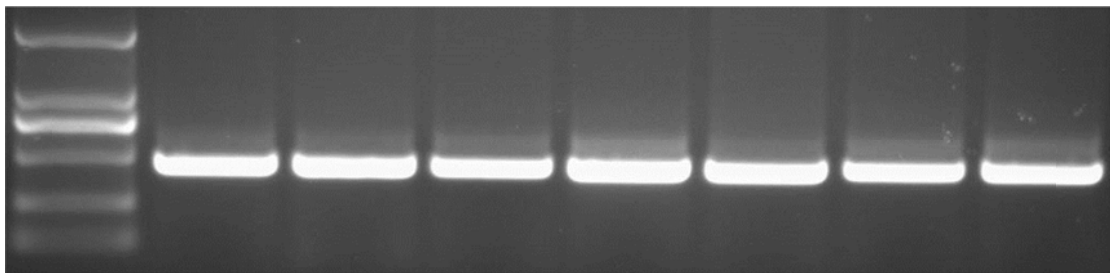

SlitOBP13

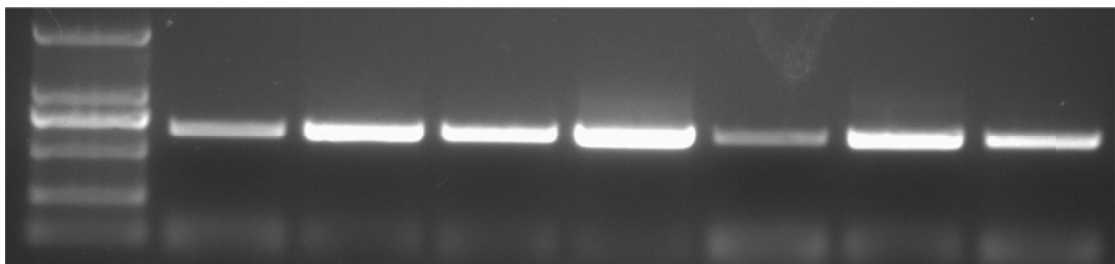

SlitOBP14

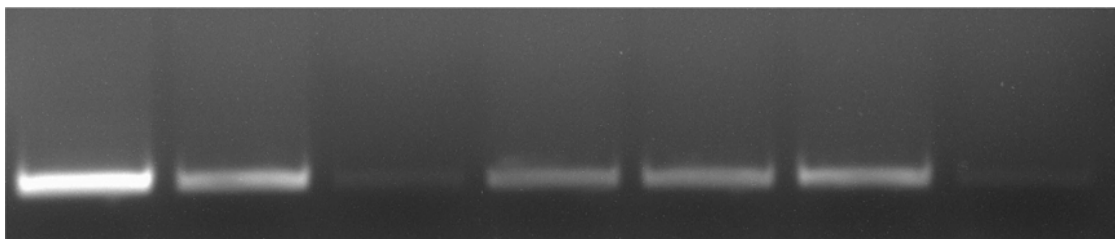

SlitOBP15

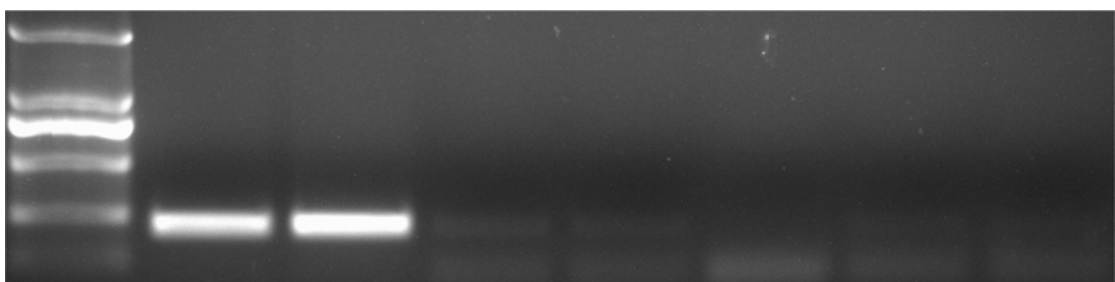

SlitOBP16

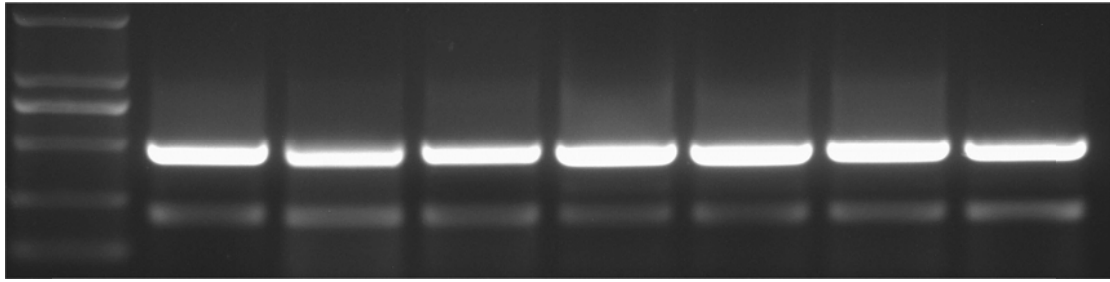

SlitOBP17

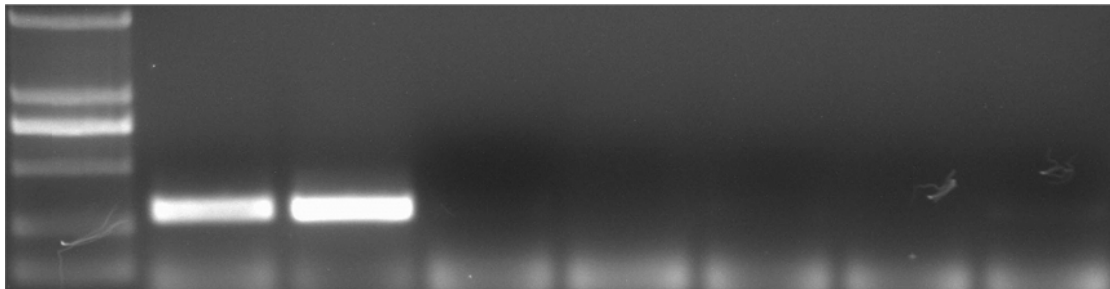

SlitOBP18

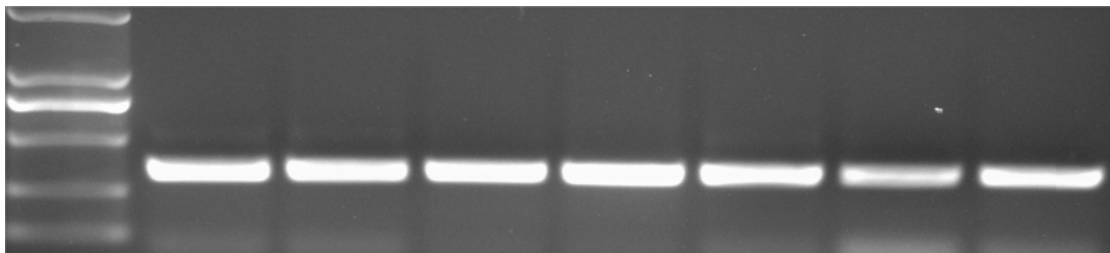

SlitOBP19

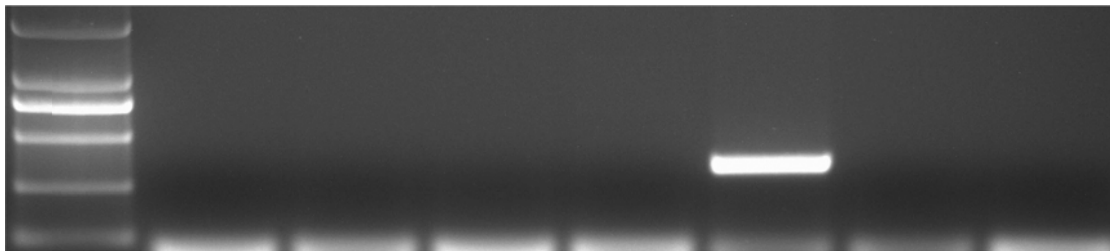

SlitOBP20

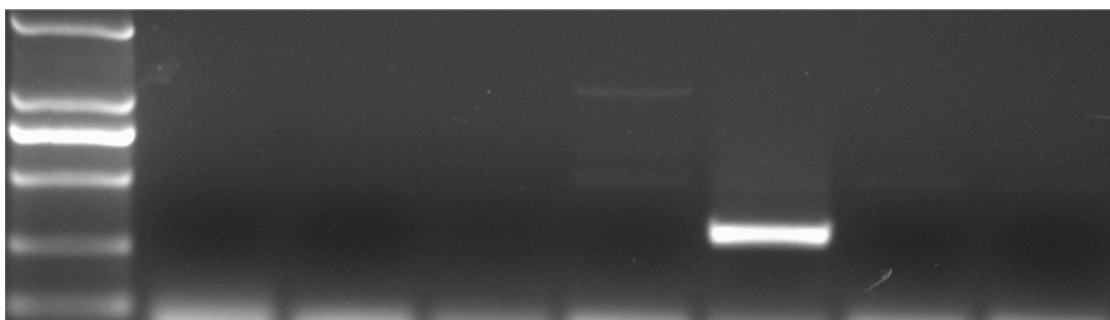

SlitOBP21

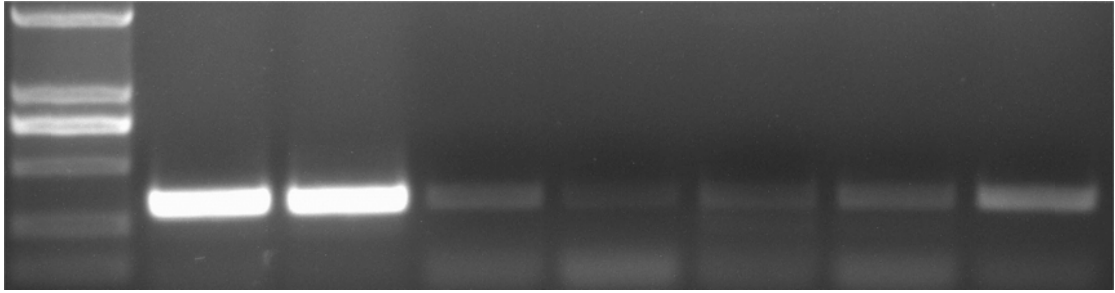

SlitOBP22

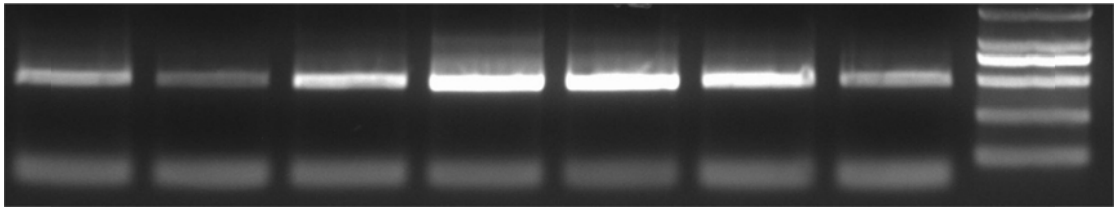

SlitOBP23

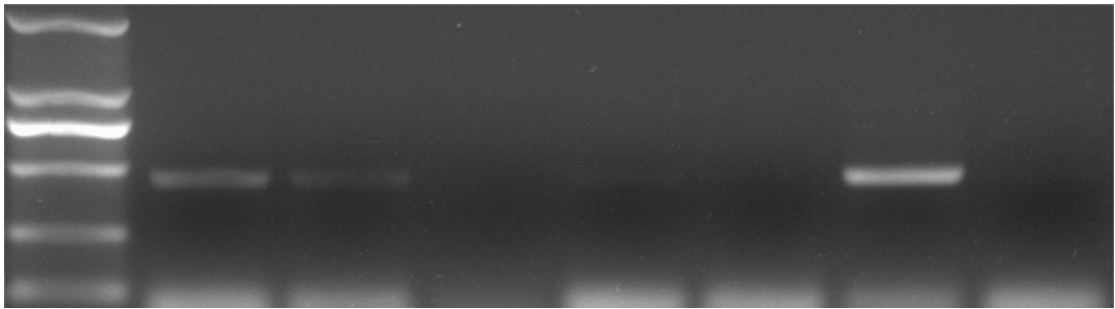

SlitOBP24

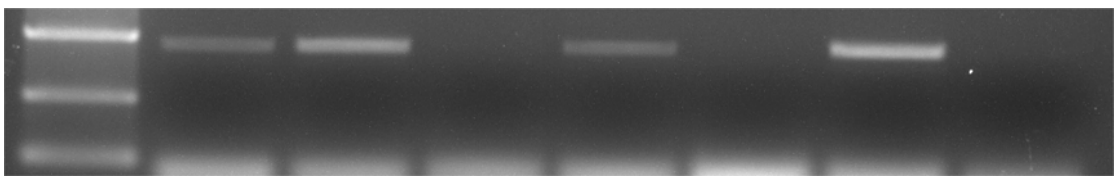

SlitOBP25

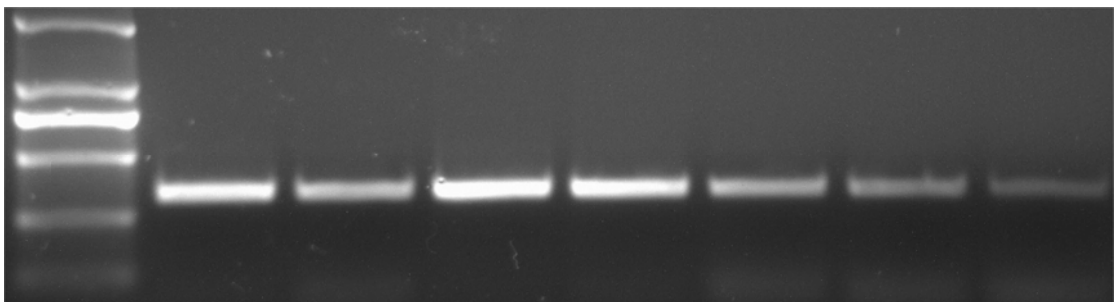



SlitOBP26

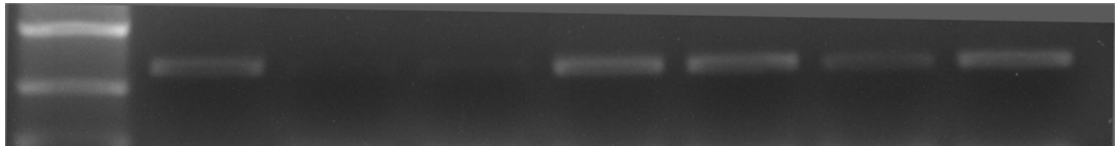

SlitOBP27

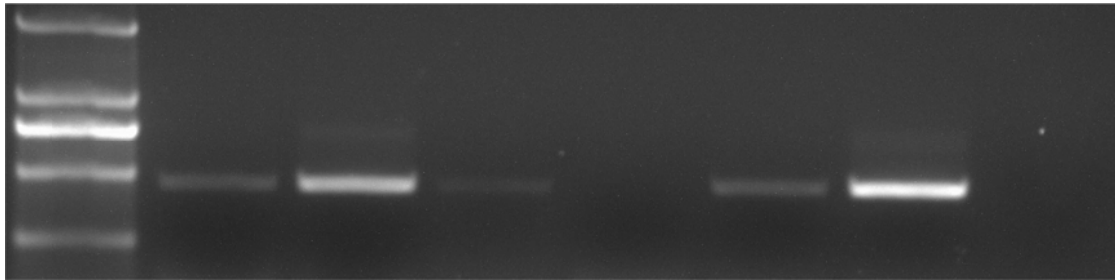

SlitOBP28

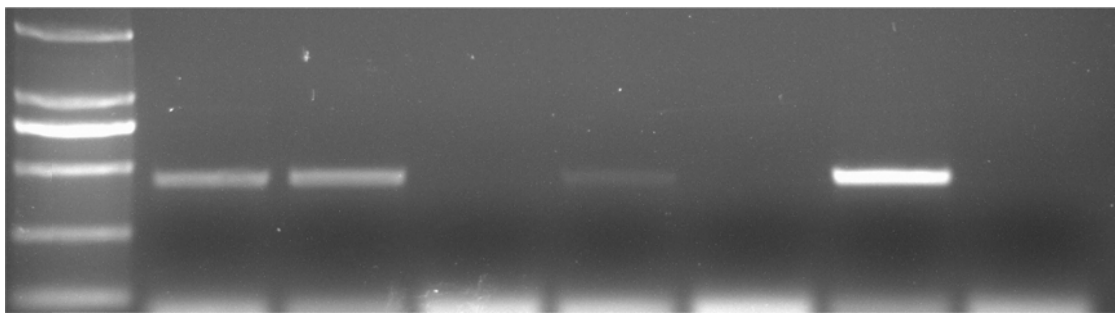

SlitOBP29

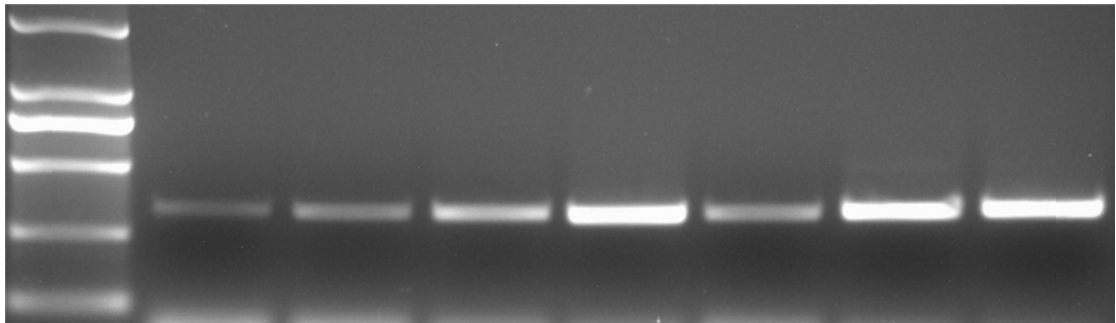

SlitOBP30

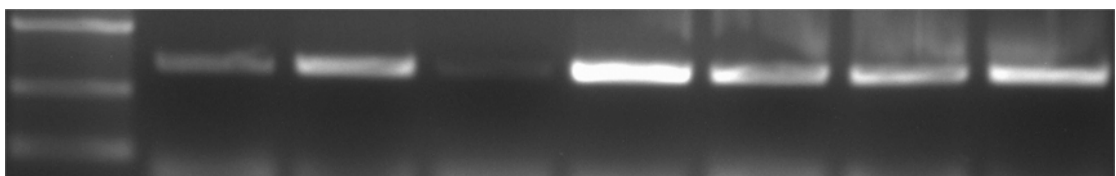

SlitOBP31

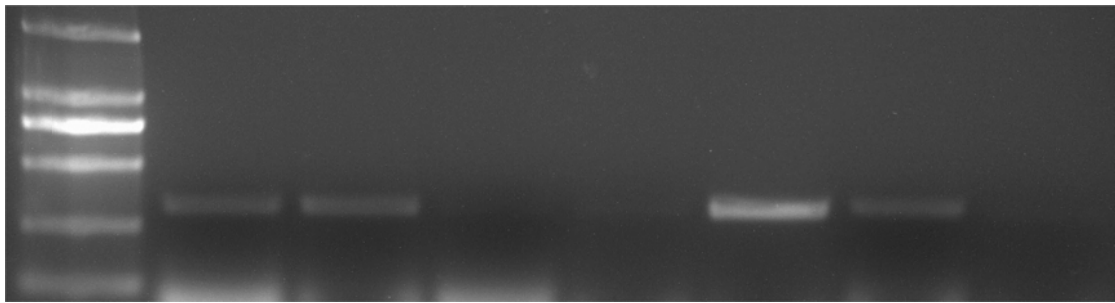

SlitOBP32

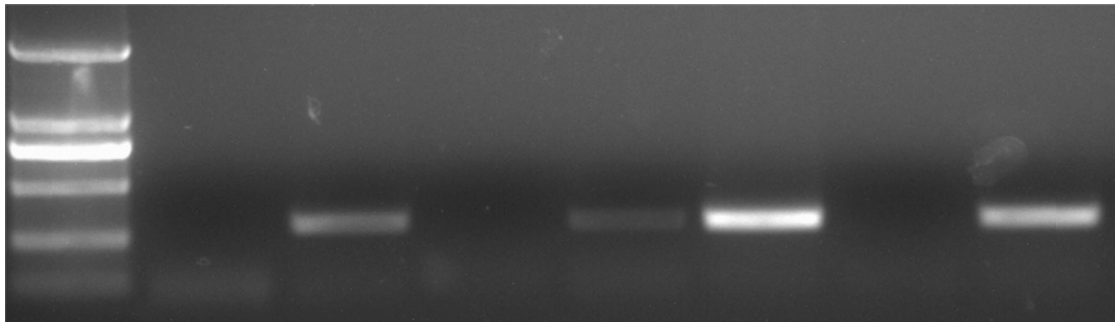

SlitOBP33

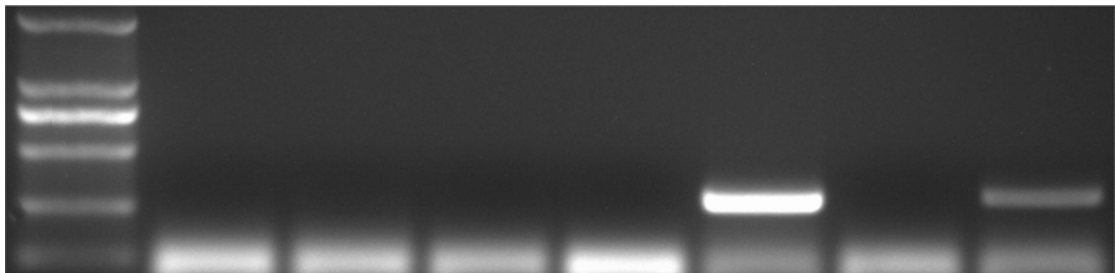

$\beta$ -actin

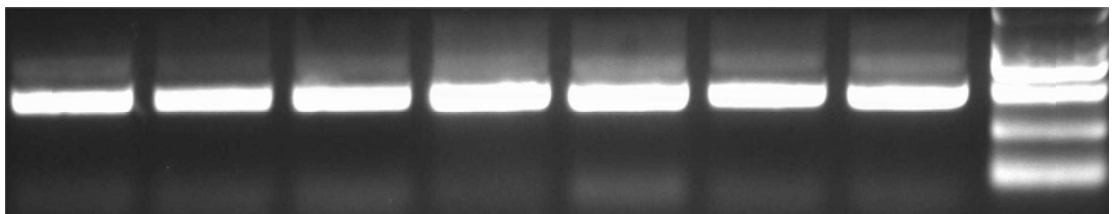





**Supplementary Table 3.**

| <b>Gene</b>  | <b>Forward primers (5'-3')</b>   | <b>Reverse primers (5'-3')</b>  |
|--------------|----------------------------------|---------------------------------|
| <i>PBP1</i>  | ATGGCGAACGCAAGATGG               | TTACACGGCGGTCATGACCT            |
| <i>PBP2</i>  | ATGGCGTTCTGTCCATCGG              | TTACACTTCAGCAAGCACCTCTC         |
| <i>PBP3</i>  | ATGGGATCGCGTAACGTCTTT            | CTATATTTCCGTGAGGACCTCACTC       |
| <i>GOBP1</i> | ATGTTGCTGTTGTTGCGCG              | TCAGCGCGCCTCAGCCT               |
| <i>GOBP2</i> | ATGACGTCTGAAGTGTGTTTGTCT         | TCAGTACTTCTCCATAACAGCTTCAAT     |
| <i>OBP1</i>  | ATGAAAGAAGGGAACCGATACAG          | CTATCCTGTCTGTTCCGTAGAAGATT      |
| <i>OBP2</i>  | ATGACTCGAGCACAAAGTTAAAAAGA       | CTTTTCATACAAACATTTTCGATGC       |
| <i>OBP3</i>  | ATGTGGATGCAGGCGCTAGT             | CTATATGAGGAAGTAGTCCGCCTTG       |
| <i>OBP4</i>  | ATGACTAAAGTACTGTTTGCCATCG        | TTAAGATTTCTCATATCTTTCAATTTCC    |
| <i>OBP5</i>  | ATGTCCGTTGTGCGGTGTTT             | TCACTCCATCTTCTTCTTAGTCTCAG      |
| <i>OBP6</i>  | ATGTCCAAGTTCACTTGTGTTGGTTT       | TTAAGCGGAGATCTCGCTCTTGT         |
| <i>OBP7</i>  | ATGGATCAAAAAGAATATGTTTATTTG      | TTATGCGAAAATAAAAATCTTCTGGC      |
| <i>OBP8</i>  | ATGCTTCTGACAAAAATTGTGAAGTT       | TCAAGGAAAGTAAAATATAACCAGGATT    |
| <i>OBP9</i>  | ATGTGCCTCGTCAAGTACCATG           | CTAGAACGTCAGGTCATCCTTCC         |
| <i>OBP10</i> | ATGGTTCGTAATAATCAGTGGACTC        | TTAGAGGCCGGAGGTTCCAC            |
| <i>OBP11</i> | ATGAAATCGTTTGTGATTCTGTATC        | TTACGAAGCGAACATAATGTGTGAT       |
| <i>OBP12</i> | ATGAAGACTCTGTTTGTGTTTCGCT        | TTACAAAAAATCGCATGCTTG           |
| <i>OBP13</i> | ATGATAACATCATGTTTATTAGTACTAAGTGC | TTAACGAACTTCAAAATCTTTTATTGTT    |
| <i>OBP14</i> | ATGGTTAAAGTTACTTACATAGCCTTGT     | GGGGCAAGTAAACTCGCATC            |
| <i>OBP15</i> | ATGTATTCCATTAAGTGTGTTTATTTTTC    | GGGAACATGAAATTAGCTGGGT          |
| <i>OBP16</i> | ATGTACCGCTTTGTGATCCTCA           | TTATATGACTTTTCGCACATTTTCC       |
| <i>OBP17</i> | ATGAAAACCTTTTCGACTACTCTGTTG      | TCAAGGAAATACAAAATTTTTCG         |
| <i>OBP18</i> | ATGTTTAAAGCTCTGTGTGTTCCCTTG      | TTATACTGTACGTGGTTGTGTGTAGC      |
| <i>OBP19</i> | ATGTTTCGCCGAACGCTG               | TTAATAGTTAACCATTATTTTGTGTTTATTA |
| <i>OBP20</i> | ATGGAAAAATCCTAATTTTACTTTTATAA    | TTACATTAGTAGAATTCTGTATAAATGTGTG |
| <i>OBP21</i> | ATGGCGCGGAGGCAGC                 | TCAGAATAAGAAGTATAAGTCTGGATCCT   |
| <i>OBP22</i> | ATGTCTGAAGTTTACCTGCATTATCC       | TTAGAACGGCATCTCAACTTTGTG        |
| <i>OBP23</i> | ATGGCCAAGTTCTCTTGTCTTGTGTT       | TTAGATGATGATACTAGTCTTATGCTCCAA  |
| <i>OBP24</i> | TGTGTTTATAAAAAGACAGAATTTTGTG     | TTTATGATCCAAAAGCATTGGGTT        |
| <i>OBP25</i> | ATGGCTAAAGTTACGTGCATAGTCC        | TTAATAATCAACACCAAACATATTTGG     |
| <i>OBP26</i> | TGCTTCTTGGCCTGCATGAT             | TTAGATGTCTGAACCCAAACTTAGAAG     |
| <i>OBP27</i> | ATGTATAAATTTGTTATTTTGTGCTCTA     | CTAGCACTTCCACGCTGTGTC           |
| <i>OBP28</i> | ATGATCGTTTCGGTTTTTATTATGTTT      | TTATGGTAATTTTATTCCCAGCTGAG      |
| <i>OBP29</i> | ATGTGGAATTTATTGGTTGTGTTT         | TTATAACTTGAATCCAAACTTGGGT       |
| <i>OBP30</i> | GCTTTATCGATGGACGATCTAAAG         | CCCTGGTCGTTTCATCATTCC           |
| <i>OBP31</i> | CGAAACGAACACCGCGAG               | AGCTCTATTAGCTTCTAATAAATGTTC     |
| <i>OBP32</i> | CGAATTGATAGGAATGATATACCTTGTA     | CTATTTCCATTCATCGGGATCTCT        |
| <i>OBP33</i> | ATGACTTGCTCCAGGCGC               | TTAGGAGTTGTTGTCTCAGTCTCGCT      |

#### Supplementary Table 4.

>SlitPBP1

MANARWRFVVFVYALYLSAVLGSQDLMVKMTKGFTRVDDCKTELNVGDHIMQDMYNYWREDYQLINRD  
MGCMLLCMAKKLDLMDQTMHHGKTEDEFAKSHGADDDVAKKLVSVIHECEQQHAGIADDCMRVLEVAKCF  
RTKIHCLKWAPSIEVIMEEVM TAV

>SlitPBP2

MAFCPSVTMSLRVALVVAASLLVVVQASQDVMKNLAVNFAKPLDDCKEMDLPDSVTTDFYNFWKEGYELTN  
RQTGCAILCLSSKLEILDQELNLHHGRAQEFAMKHGADEAMAKQIVDMIHTCAQSTPDEAADPCM KALNVAK  
CFKLVHELNWAPSVELIVGEVLAEV

>SlitPBP3

MGSRNVFVALVLTVMREIEPSKDPMKYIASGFVKVLEECKHELMNDHLIADLFHYWKLEYTLN RDTGCAI  
ICMGKKLLDLDASGRMHGNAQEFAKKHGAGDEVASQIVQIHDCEKKHERDDDECLRVLEVAKCFRTGIHEL  
NWQPNVEVIVSEVLTEI

>SlitGOBP1

MLLLLRLPLLAVALPLRADVNMKDVTLGFGQALDKCRQESQLTEEKMEEFFHFWREDFKFEHRELGC A IQC  
MSRHFNLLTDSRMHHEENTEQFIQSFPNGEVLARQMVELIHACEKQHDHEEDHCWRILHVAECFKQACVQR  
GIAPSMEIMITEFIMEAEAR

>SlitGOBP2

MTSKCCLLLVMAAATSSVMGTAEVMSHVTAHFGKALEECREESGLSAEVLEEFQHFWRDFEVHRELGC A II  
CMSNKFSLQDDSRMHVNMHDYVKSFPNGHVLSEKLVGLIHNCEKQFDSMTDDCERVVKVAACFKV DAKA  
AGIAPEVAMIEAVMEKY

>SlitOBP1

MKEGNRYSHERRITNDSGDQLMVINATDDDYSGYGSGNMGEKLLTSVPRPATPSNNINKNNTSRTKRNEPLLN  
RPDSDQCLSQC VFANLQVVD SRGIPREAE LWNKVQSSVTSQQSRSALHDQIQACFQELQSEAEDNGCSYSNKL  
ERCLMLRFSDRKVDGKGN AKKSSTEQTG

>SlitOBP3

MWMQALVLT LATLATAAAVEMDEDMAELARMVRDNCAGETGVDVALVEKVNAGAELMPDDK LKCYIKC  
TMETAGMMADGEVDIEAVLALLPPSLAEHNAPALRACGTQRGADHCDTAFRTQQCWQNANKADYFLI

>SlitOBP4

MTKVLFAIVLTMITFAVVL SASTKEAMTTTMSDQVNSIDVDVLAVMDMCNDSYRIDPTYLQALNESG SFIDETD  
KTPKCFIRCVFENVGIVSE DGKQFNPARAAVIFAGERNGKPMEDIADMTALCATDRQETCPCDRSYKFLRCLMS  
MEIEREYKS

>SlitOBP5

MSVVRCSLLVAIFCFVSVNAISGDEEAGIKDALRPFVQECAD EFGITEEQFEEAKK KASAADIDPCFMSCFLKKA  
EFFDSQGKFDVDSTMAFAKEH LTSEPAMKFVEAVGDECVKINDEDVSDGDKGCDRAKLLFECIAETKKKME

>SlitOBP6

MSKFTCLVLCVAVSLSGVHATAEKA AFIEAVKPYVQECSEKHGVTPEDIKSAKAAGNADGINS CFLSCVYKKA  
EVITEKGEYDADKALEK LKKFVSNEDDYAKFANIGKKCASVNEKSVSDGEAGCERAALLTSCFLEHKSEISA

>SlitOBP7

MDQKRICLFVIAMFLASGSDAMSRQQLKNSGKMLKKNCMNKIGVTEDQIGSIDKGFIEDRKM CYIACIYELT  
NVIKNNKLN YEASIKQIDLMYPPDVKESAKAAVECKDVQK KYKDICEASFYAAKCMYEFKPEDFIFA

>SlitOBP8

MLLTKIVKFFILVATCEAMTMKQIKNTGKMMRKT CQPKNNAEDEKIDPISDGVFIDEKEVKCYMACIMKMANT

IKNGKLNDAAMKQADLLFPDDIKEPAKEAITACRKVADAHKDICDASFHVTKCIYNHNPGIFYFP

>SlitOBP9

MCLVKYHVLVLCVILVGSYALNCRSSGGPKEAELKNIYKCLKMQEGKNSSKGNSAQDWKEPRVQIQRNDWDR  
GRVGSKENKNSRDDSRSKDKKGDGSMRDNRNDMMSSRRDDMMSRGDERNDNRKHRTDDRMGNDND  
RSGNRGRGNKNNRNDMNGRDDRFRDDYFNGREDFPQSDYEGGDMGQYNNNYSTTQSSRRYKRERRP  
SNSGQRSQYNPNNHKISGYEDNFRSDERNTTDDNNSKETDNKSCALHCFLENLEMTGEDGMPDRYLVTHAIT  
KDVKNEDLRDLQESIEECFQILDNENTEDKCEFSKNLLICLSEKGRANCDDWKDDLTF

>SlitOBP10

MVRKISGLLCLCVFGISFSDSAISADSESRNPPPTAPQKIERVITLCQDEIKLSILREALDVIKEEHTMPAQRDR  
KREVPFTHDEKRIAGCLLQCVYRKVAVDGYGFPTEGLVGLYSYDGVNERGYFMAVLEASRECLMKNHDKFSRT  
VPMDNGRNCDISDFIFECISDRIGEYCGTSGL

>SlitOBP11

MKSFVVCIVFVVGVCATEKGNKIASCEKESGVKSDVLAEAKKGNLGGDDPAFKEFTYCFKKVGVGEDGKLN  
DVAIAKLPSGVDKAEAEKLLDSCSKTKGDAVETVYEIFKCYQHGTSHIMFAS

>SlitOBP12

MSVVRCSFLVALFCFVSVNAMSGDEEAGIKEALRPFVQECADDFGITEEQFEEAKKASAADIDPCFMSCLFK  
AEFFDSQKGFVDVSTMAFAKEHILTSEPAMKFVEAVGDECVKINDEDVSDGDKGCDRAKLLFECIAETKKKME

>SlitOBP13

MITSCLLVLSAVVQVLLAKQPVFESGPPEPWGPPERTSHPGQFQPRVPKRCWVPPQRINVYNCCPIPTLYPDED  
MQSCGFELSENKPKPVYRPEGTCKEGYCVMGKFDLLANNSVDYVKFREYLDNWAESYEFANAIHIAKEE  
CAQDGGPEVPPICEPKLFLCLTSTIFWNCKLRDGECAALQEHMNECKQYTRVMAPTIKDFEVR

>SlitOBP15

MYSINCFIVSILVIMFDNCFVYSMTREQIKNSGKLIKTKCSAKNDLTEDEVKDVCKGKFIKKDFMCIACVYKM  
GQSVKGSTINHDMMLRQVDMMPNDMKAPVKSIAIEHCRPVAKNYKDLCEASYWTAKCIYDFDPANFMFP

>SlitOBP16

MYRFVILSIVLSALADDIDIRECGRIFHPPPHGCCKANNAVKNKDMLAELKDCFDGSGPKDPMKCEIDL  
KKGATDDGKLDIKKFEVITKEVGSDDKDLLEIKTNCINGDLNNGPPEFCDFMKIKHCVTLHMMNHCEWS  
DDGNCKVVKELVGKCAKVI

>SlitOBP17

MKTFRLLCCILSIFLFFDQSYGMTRQQLKNSGKLMKKSCMPKNDVTEDEVGDIKGFIEIETRNVMCIACVYTM  
SQVVKNNKLSYEAIVKQVDVMFPAEMRDAVKAATHCKETTKYKDLCESSYWTAKCMYDYDAQNFVFP

>SlitOBP18

MFKLCVFLALGFVACHGAPNSSPGTPNANPGTYCGVTPDNIYRCLNNPRVVTPEVSTKCGSQFTECEKMT  
ELKWSKRGAIKAKVRAVFDQYETEHPWAQAVQHVKAFLASELRAQGVFLNCPAYDIMQCVLASF  
SVWSTATDCAYPKAYAADCPVPCSDCYSPQIPFGSCNACYTQPRTV

>SlitOBP19

MFRRTLLLSIIYISACNGQTEAPEKNRMMGIDAVHDNNVKIDKDTIITRNKLEKRSRGPKSVS  
WYANFPKEVSEHVEKFKNMTECLKEVQTSKRPVKRLSPKMESPVHGECLIAVLRNGVIINGKVN  
ALVSKFYKDRMLMKLEKNLDRCIEMSVRAQDDCALALVLDCTNDLMSNKHKIMVNY

>SlitOBP20

MEKILIFTITLSGFAHARISVMAHDKLSDLVAQQCLSEMYPKNKRIEIQESDEPCIIFCVLKKFGIISASGVINLDIY  
RKRQVIAHQDQKTSIMDYGGSCMENAEATQHKQDVCKKAKVFNDCHTLYRILLM

>SlitOBP21

MARRQRGAMFTEALPLFVILVAVTHGGKNKPVFSDEIKEIIQTVHDECVAKTGVAEEDITNCENGIFKEDAKLKC

YMFCLLEEASLVDDDDTVDYDMLVSLIPDEYYERTTKMIFACKHLDTDPDKDRCQRAFEVHKCSYEKDPDLYFLF  
>SlitOBP22

MSKFTCIILCVVAASLTKVSHAAVTEEEKEAFREAMAPIIAECSEEHGVSEADIKAAKESASADNIKPCFLGCVMK  
KIEVLDAKGLYDAETGLGKLRKFVKDDDEFKAFEDIKCKLVNDESVDGEAGCDRAKLVLCGFIEHKVEMPF  
>SlitOBP23

MAKFSCLVLCVVAASLGSIHVASGESLRESLRPVIVACSQEHEGVTDAEIQAADAGSPASIKPCFIACVFKKAGFIN  
EQQLDLETGLKNLRQFVKDDDEQYKKLEEVAKKCSQVKDKAVSDGAAGCERGVLLAGCFLEHKTSIII  
>SlitOBP25

MAKVTCIVLFVVGVSLSIQADDGKNESEVEIDVNQIIDDCCIEEYHIPRRLFLAAAETGSTHALTPCFWSCCFKGV  
GVLNSEQYDIDATLDLSKKIFTDHEYEKVEIIVKCESVNGAPVSNNGNIECEKSVLLADCLFDNAKHFPMFMFG  
VDY  
>SlitOBP27

MYKFVILCSIFVAASNADVAQTLTKRETKASLPLSVCCDIPELADEFQLAKCSPRPPGPCEDVQCIFEVSGFLTDR  
NTLNKAAYRSHLQKWEKNHPGWTDSIYKAITDCVDNDPRQHLEVPCKAYDVFTCTGIAMLKCPDTAWKC  
>SlitOBP28

MIVRFLCLYIVIFYGAHARTDQEIKAWFFREGMDCNIEHPISPKEMLELKENKIPDTNNAKCFVACVFKKTGML  
DSKGMFDAENSIAMTQKDFANDPNRLESSKLLACKKVNDEAVSDGEKGCERSVLLHKCFVETAPQLGIKLP  
>SlitOBP29

MWNLLVFLAICSCVYARRRSGAEINGLTEEELKMEFTKLIMKCNKDGEVDMTELVQLQNYVPTKQSTKCVL  
ACAYKAAEVMNAKGEYDIDHAYKVAEMMKNNGDEKRLVNAKMMADLCVKVNELSVSDGEKGCDDRAAMIFKCT  
VENAPKFGFKL  
>SlitOBP33

MTCSQALALLALVAISQQATTGCKNCIMLGKEEKAMFRAHSDACVAASRVEPRLVDAMLAGELLDEPALRKHV  
YCVLLKCKLISKDGKLGKAAVLGKMAARPDAKNATKVLESCADQTGDTPEDLAWNLFRCGYDKKALLFDYMP  
NVASETDNNS  
>SlittoPBP1

MANARWRFVAVVYALYLSAVLGSQDLMAKMTKGFTRVDDCKTELNVGDHIMQDMYNYWREDYQLINRD  
MGCMLLCMAKKLDLMDQTMHHGKTEDFAKSHGADDVAKKLVSVIHECEQQHTGIADDCMRVLEVAKCF  
RTKIHCLKWAPSMEVIMEEVM TAV  
>SlittoPBP2

MSLRVALVVAASLLVVQASQDVMKNLAINFAKPLDDCKKEMDLPDSVTTDFYNFWKEGYELTNRQTGCAILC  
LSSKLEILDQELNLHHGRAQEFAMKHGADEAMAKQIVDMIHTCAQSTPDVAADPCMKTNLVAKCFKLVHEL  
NWAPSVLIVGEVLAEV  
>SlittoPBP3

MGSRNVFVALVLTVMARETEPSKDPMKYIASGFVKVLEECKHELNMNDHLIADLFHYWKLEYTLNDRDGTCA  
IICMGKKLDLLDANGRMHHGNAQEFAKKHGAGDEVASQIVQIIHECEKKHERDDDECLRVLEVAKCFRTGIHEL  
NWQPNVEVIVSEVLTEI  
>SlittoGOBP1

MLLLLALPLLAAVLPLRADVNVMKDVTLGFGQALDKCRQESQLTEEKMEEFFHFWRDDFKFEHRELGCIAQC  
MSRHFNLLTSSRMHHENTEQFIQSFNGEVLARQMVELIHACEKQHDHEDDHCWRILHVAECFKQACVQR  
GIAPSMEMMITEFIMEAEAR  
>SlittoGOBP2

MATVTSSVMGTAEVMSHVTAHFGKALEECREESGLSAEVLEEFQHFWRDDFEVVHRELGCIAICMSNKFSLQ  
DDSRMHVNMHDYVKSFPNGHVLSKLVGLIHNCEKQFDSMTDDCERVVKVAACFKVDAKAAGIAPEVAMI



EAVMEKY

>SlittoOBP1

MFKLCVFLALGFVACHGASNSNPSTPNANPGTYCGVTPDNIYRCLNNPRVVTPEVSTKCGSQFTECEKMTCIF  
RELKWSKRGAIKAKVRAFDQYETEHPWAQAVQHVKAFLASELRAQGVFLNCPAYDIMQCVLASFIKHAS  
PSVWSTATDCAYPKAYAADCPVCPSCYSPQIPYGSCNACYTQPRTV

>SlittoOBP2

MVRKISGLLCCLVFGISFSDSAISADSESRNPPPTAPQKIERVITLCQDEIKLSILREALDVIKEEHTMPAQRRRD  
KREVPFTHDEKRIAGCLLQCVYRKVKAVDGYGFPTLEGLVGLYSDGVNERGYFMAVLEASRECLMKNHDKFSRT  
VPMDNGRNCDISFDIFECISDRIGEYCGTSGL

>SlittoOBP3

MKSFVVICIVFVVGVCATEKGNKIASECIKESGVKSDVLAEAKKGNLGGDDPAFKEYTYCFFKKVGVGEDGKLNDR  
VAIAKLPSGVDKAEAEKLLDSCSKTGKDAVETVYEIFKCYQHGTKSHIMFAS

>SlittoOBP4

MKTLLVFAACILVAQALTDEQKEKLLKHRTECLTETKVDEQLVNLKGGDYKMDNEALKKYALCMMMSELMT  
KDGFKKDVALAKVNPADKPTVEKLIDACLANKGNTPHQTAWNYVKCYHEKDPKHAIFL

>SlittoOBP5

MTKVLFAIVLTMVTFVAVLSASTKEAMTTTMSDQVNSIDVDVLAVMDMCNDSYRIDPTYLQALNESGSFIDET  
DKTPKCFIRCVFENVGIVSEDGKQFNPARAAVIFAGERNGKPMEDIADMTALCATDRQETPCDRSYKFLRCLM  
SMEIEREYKS

>SlittoOBP7

MFTEALPLFVILVAVTHGGKNKPVFSDEIKEIIQTVHDECVAKTGVAEEDITNCENGIFKEDAKLKYMFCLLEEAS  
LVDDDDTVDYDMLVSLIPDEYERTTKMIFACKHLDTDPKDRQRAFEVHKCSYEKDPDLYFLF

>SlittoOBP8

MFGSKIVFSLFMIVSVCYGAVDIKKYFKVCDRNAIDVNDMAEAVRQGIATMINGIDELGVPPIDPYLQKDFRLE  
YKNNQLAAKLTLNKIYVEGLKEAIVHDARLRADDDKFHLEVDLSGPRVSRSDYYGEGQFNALKIVAYQVNTT  
MTDLVYTWKLAGVPEKNGTETYIRIKDFYMRPDVGSVTHFRNDNPESRELTDLGRFANENWRMLYKEFLPY  
AQANWNRIGVRVANKLFLKVPYDQLFPTSS

>SlittoOBP9

MCLVKYHVLVLCVILVGSYALNCRSSGGPKEAELKNIYKCLKMQEGKNSSKGNLSAQDWKEPRVQIQSNDNDG  
SGNRGRGNKNNRNDMNGRDRDFGRDDYFNGREDFPQSDYEGGDMGQYNNNYSTTQSSRRYKRERRPS  
NSGQRSQYNPNNHKISGYEDNFRSDERNTTDDNSSKETDNKSCALHCFLENLEMTGEDGMPDRYLVTHAITK  
DVKNEDLRDFLQESIEECFQILDNENTEDKCEFSKLLIDLSVRE

>SlittoOBP10

MKEGNRYSHERRITNDSGDQLMVINATDDDYSGYSGNMGKLLTSVPRPATPSNNINKNNINRTKRNEPLL  
RPDSDQCLSQCVFANLQVVDKSGIPREAEWLNKVQSSVTSQQSRSALHDQIQACFQELQSEAEDNGCSYSNKL  
ERCLMLRFSDRKVDGKGNKKSSTEQTG

>SlittoOBP11

MSKFTCLVLCVAVSLNGVHATAEKAFAIEAVKPYVQEQSKEHGVTPEDIKSAKAAGNADGINSCLSCVYKKA  
EVINEKGEYDVKALEKLLKFFVSNEDDYAKFANIGKKCASVNEKSVSDGEAGCERAALLTSCFLEHKSEISA

>SlittoOBP12

MSVVRCSFLVALFCFVSVNAMSGDEEAGIKEALRPFVQECADFEFGITEEQFEEAKKASAADIDPCFMSCLFKK  
AEFFDSQGGKFDVDSTMAFAKEHILTSEPAMKFVEAVGDECVKINDEDVSDGDKGCDRAKLLFECIAETKKKME

>SlittoOBP13

MITSSLLVLTAVVQVLFAQQPVFESGPPPEPWGPPQRPAPHRRQFLPRIPKRCWVPPQRINVYNCCPIPTLYPDED

MQSCGFEEKTSNGNTDQPQKPVFRPEGTCKEGYCVMGKFDLLFANNSVDFVKFREYLDNWAESYPEFANAIRIAK  
QECAQDGGPEVPPICEPKLFLCLTSTIFWNCKLRDGDGCAALQEHMNECKQYYTRQMEPTMKDIEVR

>SlittoOBP14

MDQKRICLFVIAMFLASGSDAMSRQQLKNSGKMLKKNMKNIGVTDDQVGSIDKGFIEDRKVMCIACIYEL  
TNVIKNNKLNIEASIKQIDLMYPPDVKESAKAAVEKCKDVQKQKYKDICEASFYAAKCMYEYKPEDFIFA

>SlittoOBP15

MFNNCFVYSMTREQIKNSGKLIKTCSAKNDLTEDEVKDVDKGFIEKDFMCIACVYKMGQTVKGSTINH  
MMLRQVDMFMFNDMKAPVKAIEHCRPVAKNYKDLCEASYWTAKCIYDFDPANFMFP

>SlittoOBP16

MLAEELKDCFDGSGPKDPMKCEIDLCAKKGKGFATDDGKLDIKKFEEVITKDVGSDDKLLDEIKTNCINGDLNNY  
GPPEFCDFIKIKHCVTLHMMNHCEWSDDGNCVVKELVKGCAKVI

>SlittoOBP17

MRTFRLLCCILSIFIFDQSYGMTRQQLKNSGKLMKSCMPKNDVTEDEVGDIEKGFIESTRNVMCIACVYTM  
SQVVKNKLSYEAVIKQVDVMFPAEMRDAVKAATHCKETTKKYKDLCESSYWTAKCMYDYDAQNFVFP

>SlittoOBP18

MILXYTQKLTNMLLTKIVKFFILVATCEAMTMKQIKNTGKMMRKTQPKNNVEDEKIDPLSDGVFIDEKEVKCY  
MACIMKMANTIKNGKLNDAAMKQADLLFPDDIKEPAKEAITACRQVADAHKDICDASFHVTKCIYHNHNSIFY  
FP

>SlittoOBP19

MYSKICILLFISYTCLVTADSVSFIKCKWDDGKCAKESGQNVVIQKFAAGISEYNVGVSDPLHIEYVDASSPNMKLI  
VTDVVVTGLRNCVKKIQRFEDESSKLVKLLCAAELNGKYDMKQQLFVPIEGNGGLYSKVPKIQINAEVDLNTKQ  
GKDGKDHVIVKSWRHTFELKDKSTVKFENLFPDNEFLRTSTNELIAQNGNDVIEIGANLIKAIVGKIVENIKKFFI  
AVPIEDLSL

>SlittoOBP20

MWVQALVLTATLVTLVAAAVEMDEDMAELARMVRDNCAGETGVDVALVEQVNAGAELMPDDKCLKYIKCT  
METAGMMADGEVDIEAVLALLPPSLAEHNAPALRACGTQRGADHCDTAFRTQQCWQNANKADYFLI

>SlittoOBP22

MNRLLLVYLVLVYAGCSYGMTRAQVKKTMGIIKNQCMKNSVTEEQVGRIEQGVFIEDRNVMCYVACIYKSLQ  
VVKNDKLDMALITKQIDILYPPELKEPVKKSVAACFHSQDNYSDFCEGVFYASKCLYEKDPASFIFP

>SlittoOBP26

MFNSSVFMVCLYFCALTPYLVSAMTAEQKALIEHFETIGKSCNKDSTMITAEDIANLRACKIPTGNAPCFLAC  
MMKQIGVMDDNGMVQKETALEMAKAVFDDPEEIKAIEDYLHSCSHINTESVSDGAAGCERAMLAYKCMTEN  
ASKFGFDI

>SlittoOBP25

MSKLSVFCVAVMRLCVFVASEDANSIFHAPIKPIVIDCAKEYGLSEDDIKNRGLDGLKNLPPCFIRCVLNKLDII  
NDKGQYDADSGIATIKGLMSNNEYLEKISGVLKECESVNEKSVSDGDAGCERALLGAMCYLDHKTIVLA

>SlittoOBP24

MYKIISLVFCIAVCLNRVHGNAEDKIAIMTAVKPFVEECAKKGHVTFEALLTAKASGKIDGVEPCFYSCVYKTEFL  
NSKGEYDVRTALAKLKYISNDDYAKLSQVGKRCASVNSKPVGDGEAGCERGVLLTQCFLDHKGSVPM

>SlittoOBP28

MIVRFLCLYVIFYGVHVQARTDQEIKAFFFREGMDCNIEHPISXKEMLELKENKIPDTNNAKCFVACVFKKTG  
MLDSXGMFDAENSIAMTQKDFANDPNRLESSKKLLETCKKVNDETVDGEKGCERSVLLHKCFVETAPQLGIKL  
P

>SlittoOBP23

MAKLSCLVLCVVAASLGSIHVAKGESLRESLRPVIVACSKEHGVTD AEIQAAKEAGSPASIKPCFIACVFKKAGFIN  
EQGQLDLETGLKNLRQFVKDDEQYKQLEGVANKCSPVKDKAVSDGAAGCDRGMVHLAGCFLDHKTSIII

>SexiPBP1

MAGAKWQFVVCVVFALYLTSAALGSQELMMKMTKGFTKVVD DCKAELNAGEHIMQDMYNYWREDYQLINR  
DLGCMILCMAKKLDLMEDQKMHHGKTEEFAKSHGADDEVAKKLV SIIHECEQQHAGIADDCMRVLEISKCFRT  
KIHCLKWAPNMEVIMEEVMTAV

>SexiPBP2

MAFCRSATMSVRVALVVAASMLVVVQASQDVMKNLAINFAKPLDDCKKEMDLPDSVTTDFYNFWKEGYELT  
NRQTGCAILCLSSKLEILDQELNLHHGRAQEFAMKHGADETM AKQIVDMIHTCAQSTPDVAADPCMKT LNVA  
KCFKLKIHCLNWAPSMELIVGEVLAEV

>SexiPBP3

MGSHNVFVALVLLAVGM RVAEPSKDAMKYITSGFVKVLEECKQELNMNDHIIADLFHFWKLEYALLSRDTGCVI  
ICMSKLDLLDANGRMHHGNAQEFAKRHGAGDDVASKIVQI IHDCEKHERDDDECLRVLEVAKCFRTGIHDL  
DWQPKVEVIVSEVLTEI

>SexiGOBP1

MLFLLRALPLLA AVLPLRADVNMKDVTLGFGQALDKCRQESQLTEEKMEEFFHFWRDDFKFEHRELGC AIQC  
MSRHYNQLT DSSRMHHDNTEQFIKSFNGEV LARQMVELIHSCEKQYDHEDDHCWRILHVADCFKQGC VQR  
GIAPSMEMMMTEFIMEAEAR

>SexiGOBP2

MTAEVMSHVTAHFGKALEECREESGLSAEVLEEFQHFWR EDFEVVHRELGCAIICMSNKFSLQDDTRMHV  
NMHDYVKGFPNGHVLSEKLVLIHNCEKRFDSMTDDCER VVKVAACFKVDAKAAGIAPEVAMIEAVMEKY

>SexiOBP1

MSKFTCLVLCV VAGCLSGVHATAEKAALIEAVKPYIQECSKEHGVTPEDIKSAKEAGNADGINACFLRCVYNKA  
GVINDKGEYDADKALEK LKFVSNEDDYAKFAEIGKKCASVTETSVSDGEAGCERAALLTSCFLEHKSEVHA

>SexiOBP2

MKSFVVFCIVLVV GVCANEKGNKLD RPFASECIKETGVKNELLE EAKKGIISEDPAFKAFTYCFKKIGIVGEDGLL  
NRDVAIAKLP SGVDKSEA EKL DSCSKTGKDAVDTVFEIFKCYQQGTKSHIMFAS

>SexiOBP3

MVKLTCVVFCAVAM ALSV FVAGEDANSVFQGAIKPLIAECAKEYKLSDEELLKNRGLAGLSNLPPCFIGCVLKKF  
DIINDKGLYDAEAGIAKIEKLLPNNEFLDKISGVLKSCESANEK SVGDGDAGCERAVLVATCYLEHKTAVIA

>SexiOBP4

MWNFLVVF LAICSCVYGLTEEELKMEFTKLIMKCNKDGKVD MTELVLQNYVVPTKQTTKCVLACAYKAAEVM  
NAKGEYDIDHAYKVAEMMKNGDEKRLVNAK KMADLCVKVNEQSVSDGEKGCDRAAMIFKCTVENAPKFGFK  
L

>SexiOBP5

MTMKQIRNTGKMMRKT CQPKNNVEDEKIDPIAEGVFIDEKEVKCYMACIMKMANTIKNGKLN YDAAIKQAD  
LLL PDDIKEPAKEAITACKKVADAHKDICDASFHITKCIYNHNP GIFYSP

>SexiOBP6

MLGSLLFVFAFSV FSLGAEALLIDDLKQKYADSI LQCSQQYPLDRADAELLQNKVMPDKESTKCLFACVYKVTGV  
MSDQGELSV EGVNALSQKYLADDPEK LKSEEFTEACRTVNDAPVSDGARGCDRAALIFKCTIEKSPDFSFV

>SexiOBP7

MTKVLFAIVLMMITFAV TLSASTKEAMTTTMTDQVNSIEVDVLAVMDMCNDSYRIDPTYLQALNESGSFIDET  
DKTPKCFIRCVFENVGIVSE DGMQLNPARAAVIFAGERNGKPMEDIADMTALCATDRQETCPCDRSYKFLRCL  
MSMEIEREYKS

>SexiABP1

MSVVRYSSFVVALFCLVSVNAMSGDEEAGVRDALRPVYQECADEYGITEEQFEEAKKKASADDIDPCFMSCFLK  
KAEFFDAQGKFDVDSTMAFAKEHLSSEPAMKFVEAVGDECVKINDEDVSDGDKGCDRAKLLFDCIAETKKKM  
D

>SexiOBP10

MDRKRICLFVIAMFLASGSDAMSRQQLKNSGKMLKKNCMNKIGVTEDQVGSIDKGFIEDRKVMCIACIYEL  
TNVIKNNKLNYEASIKQIDLMYPPDIKESAKAAVEKCKDVQKKYKDICEVSFYAAKCMYEFKPEDFIFA

>SexiOBP8

MARRQQGAMFTETLPLFVILVAVTHGGKDKPVFSDEIKEIIQTVHDECVAKTGVAEEDITNCENGIFKEDAKLKC  
YMFCLLEEASLVDDDDTVDYDMLVSLIPDEYYERTTKMIFACKHLDTDPKDRQRAFEVHKCSYEKDPDLYFLF

>SexiOBP9

MKTLFVFAACILLAQALTDEQKEKLLKHRTECLSETKVDEQLVNKLKGGDYKTESEPLKKYALCMMMKSSELMTK  
EGKFKKDVALAKVNPADKPTVEKLIDACLANKGNTPHQTAWNYVKCYHEKDPKHAIFL

>SexiOBP11

MKEGNRYSHERRITNDSGDQLMVINATDDDYSGYSGNMGEKLLTSVPRPASSNNINKNNTRRRRNEPFL  
NRPDSQCLSQCVFANLQVVDSRGIPREAELWNKVQTSVTSQQSRSALHDQIRACFQELQSEAEDNGCSYFNK  
LERCLMLRFSDRKVDGKGNPKKSSTEQT

**Supplementary Table 5.**

>BmorGOBP1

MWKLVVVLTVNLLQGALTDVYVMKDVTLGFGQALEQCREESQLTEEKMEEFFHFWNDDFKFEHRELGCAIQC  
MSRHFNLLTDSSRMHHENTDKFIKSPNGEILSQKIDMIHTCEKKFDSEPDHCWRILRVAECFKDACNKSGLA  
PSMELILAEFIMSEADK

>BmorGOBP2

MFSFLILVVASVADSVIGTAEVMSHVTAHFGKTLSEECREESGLSVDILDEFKHFWSDDFDVVHRELGCAIICMS  
NKFSLMDDDVRMHVNMDEYIKGFPNGQVLAEKMVKLIHNCEKQFDTETDDCTR/VVKAACFKKDSRKEGI  
APEVAMIEAVIEKY

>BmorPBP1

MSIQGQIALALMVYMAVGSVDASQEVMMKNLSLNFQKALDECKKEMTLTDAINEDFYNFVWKEGYEIKNRETGC  
AIMCLSTKLNMLDPEGNLHHGNAMEFAKKHGADETMQQQLIDIVHGCEKSTPANDDKCIWTLGVATCFKAEI  
HKLNWAPSMDEVAVGEILAEV

>BmorPBP2

MKLQVVVLTVEMVCGSRDVMNLSIQFAKPLEACKKEMGLTETVLKDFYNFWIEDYFTDRNTGCAILCMS  
KKLELMDGDYNLHHGKAHEFARKHGADETMKQLVDLIHGCSQSVATMPDECERTLKVAKCFIAEIHKLKWAP  
DVELLAEVLNEVSWKS

>BmorPBP3

MARYNIVVAVLVGVVGARGSSSEAMRHATGFIRVLDECKQELGLTDHILDMYHFWKLDYSMMTRETGCAIIC  
MSKKLDLIDGDGKLHHGNAQAYALKHGAATEVAAKLVEVIHGCEKLHESIDQCSR/VLEVAKCFRTGVHELHW  
APKLDVIVGEMTEI

>BmorOBP5

MKQRLRVLLLRFILQTVLSESGVDVVKNLSLSFARFFLECDEERHFQPEVRLKVMTFWYSESSTWDRDVGCAF  
LCIFKKMEIDNPQDPSYRTHLELLSFANSEDNKIANQMVEIFYACGENTETDPCLWALEQVKCYKNRINQLGLTP  
TF

>BmorOBP8

MLRVVVICVCFVLIAPYGINASSLDDLKMYVKNVIKECVGDYPITAADLKLKARQIPNDDIKCVFACAYKKTGM  
MTEEGMLSVEGIKMSQKYLSDNPEQLRKSKEFAEACSSVNDQQVSDGTGKCERAAIFKCFSTEKITNFGFEL

>BmorOBP9

MLRVVVICVCFVAVPYGINAVSYEQKIKIRDQLDRAGFECKFDHKITEDDIKNLRANKPATGENVPCFIACVMKK  
TGVMNDQGVIRKGPVLELAKKVLADDKDIKKLQDYIHSCSHVNSKTVHDKGKGCEFAMQAYTCMSANASKFG  
FNI

>BmorOBP10

MLRVVVICVCFVLIAPYGINAVSDEQKIKIREQIDKSGFECFKDHKITEDDIKNLRANKPATGENVPCFIACVMKKT  
GVMNDQGVIHTEPVLQAKKVLTDKDIKKLQDYIHSCSHVNSKTVHDKGQGCFAIQTYTCMSANASKFGFD  
V

>BmorOBP11

MSANSFVVLAFCALAVGVNALTEEQKAEITKSSLPKIAECSKEFSVNQGDIDAAKLGDPSSGLNSCFVGC FMKKA  
GIINASGLFDVAATIEKSKKYLTSEEDLKA FEKLTETCAPENDKPVSDSDKGCERAKLLLD CFVANKGSFSV FSL

>BmorOBP12

MTSFMVFFVLSVLTLYSDALTDEQKNKIQSKFIEIGAECIVEHPISIDDINSFKNKKFSPGVNAGCFVACIFNKIGL  
FDDKGNLSHNSALEKAKGIFNADEEVKNLEEFNRCAKVNGEAVGDGVKGCERAKLAYNCLIENSLEFGFNIDF

>BmorOBP13

MLKIHVLLCFGMAILYFGSAKAVTPEESKAFAFAKPVIEQCQKDFGMDKESFAQKNLDEIDECLIACVVEKFGIT  
NDEKIDGDALKALVTKFVGNNEERNKINKIVEECTEDANKSGDGT CNTSTILFLCLLNGKDLWGF

>BmorOBP14

MSRQQLKNSGKMLKKQCMGKNDVTEEEIGDIEKGFIEQKNVMCIACIYQMTQIIKNNKISYEASIKQIDL MY  
PPELKESAKASAGRCKDVSKKYKDICEASYWTAKCMYEDNPKDFIFA

>BmorOBP15

MFLKNIFIECVLLYFVMLNTSFVNTMTKQQIKNSGKILKKACISKNDVTEQISDIDKGFIEDKNVMCIACVYS  
MSQVVKNKNFVHDAMVKQVDMMPTEMRDAVKASIANCRGVAKNYKDICEASFWTAKCMYEFDPANFV F  
A

>BmorOBP16

MRISFLFLISVTIITFDSVFAMTRAQVKKMTIMKNQCMPKNGVTEDQVGKIEEGIFLENHNVMCIACVYKTI  
QVVKNDRLDKDLISKQIDVLPQEIRESTKKAVGDCINLQEKYDDWCEGIFRSTKCLYEKDPANFIFP

>BmorOBP17

MTRQQLKNSGKIMKKT CMPKNDVTEEEIGQIEQGFLEQRNVMCYACIYTVTQVVKNKLSYDAVIKQVDV  
MFPAEMRPAVAAAENCKDISKTFKDICEASYWTAKCMYDFDPKNFVFP

>BmorOBP18

MILIVIAKFLILISLCETMTMKQIKNTGKMMRKSCQPKNNVDDEKINPINDGVFIEENEVKYCIACIMKMANTM  
KNGKLNFEAAMKQADLLLPDEMKEPTKEAIVACRKVADSYKDVCDASFHVTKCIYNHNPSVFFFP

>BmorOBP19

MTSAKTDVEIKAWFLGQAVECSKDHPVTTEELRMHKHELPDSKNAKCLMKCVFRKCNWLDSKGM YDINAAY  
ASSTKDFSDDKTKQENANKLFDTCVNEENVGDGEEGCDRSLLLAKCLTKAAPQVSIYYS

>BmorOBP20

MAVHIFLILASYMALAAHGQLDDEIAELAAMVRENCADESSVDLNLVEKVNAGTDLATITDGKLCYIKCTMET  
AGMMSDGVVDVEAVLSLLPDSLTKNEASLKKCDTQKGSDDCDTAYLTQICWQAANKADYFLI

>BmorOBP21

MITASLHVIFALLAFVYGGKDKPVLSEEIKEIQTVHDECVGKTGVSEEDITNCESGIFKEDVKLKYMFCLLEEAGL  
VNDDGTVDYEMFTSLIPEEYFDRATKMIFCKELDTPDKDKCERAFEVHKCSYEKDPDFYFLF

>BmorOBP22

MLKVFFFFVCTLGASQLCAALYTQKVAVSFPKDKTTIVVEAMKSCIAKTGANPNVIEVISSGKVSEDEKFEFFYC  
ACNDIGVVNPDGHIVKECIELFPKETQPLVEPVIKNCDKEGVNKYDTLKFYKCFQETSPVRVTLA

>BmorOBP23

MTSKVLLSCVVLAVLATTVLAEDSRKLVSAPEVAKKLVLIQECLNENGLGEDAIEVIRAGEYREDEPFQNLVYCA  
YKFGALDENNRISQVAAASFPKDIDVVTVIESCGKEDGNTPVEQVFKYFKCFQKNSPVRMQLY

>BmorOBP25

MKSVVLICLAFVFNCGADNVHLNEDEREKANWYTAECGVETGVSTEVINA AKIGKYSKDKAFKKFVLCFFKKS  
AILNSDGT LNMDVALAKLPSGVNKSEAQSVLEQCKNKTGQDAADKAFAILQCFHKGTKTHILF

>BmorOBP26

MKSVVLICLAFVFNCGADNVHLAETQKEKAKQYTSECVRESGVSTEAINAAKIGKYSKDKAFKNFVLCFFNKSA  
IFNSDGT LNMDVALAKLPPGVNKSEAQSVLQCKNKTGQGAADKAFEIFRCYKGT KTHILF

>BmorOBP27

MKSVVLICLAFVFNCGADNVHLTETQKEKAKQYTSECVKESGVSTEVINA AKTGQYSEDKAFKKFVLCFFNKSA  
ILNSDGT LNMDVALAKLPPGVNKSEAQSVLEQCKDKTGQDAADKAFEIFQCYKGT KTHILF

>BmorOBP28

MLKVFI VTFFAFQLSAIARLQANGCVAVPFPKDKTIIIVEAMKSCIAKTGANPNFIDVIRSGKVSEDEKFEFFYCT

CNDTGFVNPDPGHKIVKECIELFPKETQPLVEPVIKNCDKEEGVNKYDTLFLKFLKCFQETSPVRVALA

>BmorOBP29

MTGPAAAAVLLALLAAAGQATTGCKNCVILGKEERAMFRSHSDACLAQSRVEPRLLESMMNGELIDDAALRK  
HVYCVLLSCKMIGKDGKLLKAAILGKLAARPAGRDVTKVLEACAEQPGASPEDVAWNIFRCGYNRKAVLFDYM  
PAGGASSGNTENHP

>BmorOBP30

MRSFVILLNYGLCCGQFMAEDYYYDIVTRDPDDLREKENEVRALRAFQADCAEDVQVKPDLVNLKSGDW  
QTEDVSLKKWALCVLMKLGMLTAQGVFKMNEAMSKIPDMNDKIIAEKLIDDCLSLQATTPHDAAWNLIKCHH  
QKDPEGNFSSLNIF

>BmorOBP31

MKTFIVFVVCVLAQALTDEQKENLKKHRADCLSETKADEQLVNLKKTGDFKTENEPLKKYALCMLIKSQLMTK  
DGKFKKDALAKVPNAEDKLVKELIDACLANKGNPHQTAWNVVKCYHEKDPKHALFL

>BmorOBP32

MYSKYLNDFTNPEILILLSSVALMSYGYNTKLFHSLGSEPSLSILYARDKKSVDKVTNECLMEMYPKNLYKYPLR  
IDRNDIPCIHCVLKKFGIISNDGFINIKNYRRVQAIHRYDPRILISDVGETCAQNINGMNLHDHVCCKAKVFND  
CTQLYAIYREPEDW

>BmorOBP33

MYAHDKLSDMIADQCLNEMYPRSKRLEIEESDEPCIIFCVLKKFGIMSPTGVINLEAYRKRVLPEQLAQRNSIN  
DFGSACLESAEATQHKQDVCKKAKVFNECTHLYKILLK

>BmorOBP34

MEKMILLNVFAVVLPCVLASRTRGSSGLVDFTDPKVQGHLDALVRMAQSCVIKVRATPKDVRAVFTNSSPVS  
SGQCFATCMLEQSDIINHGVNRDLLVHLAGLVNGKNSRVVRKLNVSRLCLDSISGMTDRCQLASTYNDCLNE  
NMIEFAPFLDIAEEAVRKMPPFHLIQPK

>BmorOBP36

MAVSEISRILFTIVSFIYIVYSFKPLTKDEHIERYNKMNEDIEPFRKNLTECARQVKASMADVEKFLKRIPQSNME  
GKCFVACILKRNLIKNNKLSQENLLEVNRAVYGGDSEVMRSRLKTAILECSKIVEDIFEICEYASVFNDCMHMKM  
EHILDKITMERRMEALGQMSSNPDEWSEEEDEMLKLVKDEL

>BmorOBP37

MFYPFRFTLLFYGLFVIYLVRAEPEKENHFTLALKKTLFSTARSCMSHVNANETDLEYLRKDPFPDKAACIIKCLLE  
KIGVVKNKYSKMGFLTAVSPLVFTNKKKLDHYKSVSENCEKEINHDQTTECELGNEVVSCIFKYAPELHFKT

>BmorOBP38

MANLVLLLTFLVMTLSMARLKSTEAPKSKTALFNDQDNMGYEELDMEEIMSACNESFRIEYAYLESNDSGSFP  
DETDKTPKCYIRCVLEKTEILSENGVLNPATAALVFAGERNGKPMSDLLEEMAVACADRHEKCKCEKAYNFVKCL  
MYMEIDKYEKKN

>BmorOBP39

MVRKISALLCCFCVLGISMCDISAISTDNEQRCKNPPTAPQKIERVITLCQDEIKLSILREALDVIKEEHTMPAERKR  
NKREVPFTHDEKRIAGCLLQCVYRKVKAVDGFGFPTLEGLVGLYSDGVNERGYFMAVLEASRECLMKNHDKFS  
RTTPMDNGRNCVDFIFECISDRIGEYCGTSGL

>BmorOBP40

MSEFIQPSWRTQC�FRLNWDNRNRLSIDISHGAATTQTPVPTTKPKALRDFMVVPPQSCDKTTCVFKLNLIVSD  
KGVVDVKSFIKLLDKFTNSYPVWNSAKARVITCLRKSLIAYDGGCELNNILACTFDVLSENCPLNGNNQTC

>BmorOBP41

MLTILFLLPIVVGVLSGNIPEQPRVYCGELPNTIYSCLGNPKIIQPEVSEKCNKPISECDKTRCIFKESGWAKNNVID  
KKKVSDYFEQFAKDNPDWSAAVQNFKTTCLSDSLKPGQVDTNCPAYDIIHCALISFIKASPSQWSTSEQCVYPR

QYAGACPVCPERCFAPSVPNGSCNAACLALLRTP

>BmorOBP42

MMGYACVFVILAVLQAI SAEDPPGLPPFLKDAPEKCKSPPRVKNPNECCISEPFFKEADFI ECGIEKPGSERGPPD  
CSKQNCLLKKYNLLKNDETPDIEAIKSLDKYIEKNPSFKSSVEKAKECLREDLPGPPQICLANRMTLCIGTVLLME  
CPDEKWNTTDDCKAFKDHMTECQKYFPK

>BmorOBP43

MKVCVLF AIFTVAQA AKATLKPISACCNIP ELGNPEPLAEC SNPKLPGPCKDIQCVFEKSGFLTENKTLIKEAYKTH  
LRQWAKEHEGWSVAVEKAISDCV DKLDRQYLEFPCSAYDVFTCTGIAMLK KCPNEHWTC

>BmorOBP44

MSRLVFF TILVVLQEFII NLYFN FITEIDSCCVKYPKLF DSEFITECYNTQRKANDK CERDMCVARKL NLLTEEDSI  
NKDALLRFVEEGFKTEIDL VNAIKKKCFEEDISNIGKPEMCEVAKYKICITSRMAEDCPKWDSKGICSSAQQKVEN  
FMKMLS

>HarmPBP1

MEFHRSTMM SVRLALVVAVCLFIRVDASQDV IKNLSMNF AKPLEDCCKEMDLPDSVTTDFY NFWKEGYEFTN  
RQTGCAILCLSSKLELLDQELKLH HGKAQEF AKKHGADDAMAKQLVDLIHGCAQSTPDVADDPCM KTLNVAKC  
FKAKIHELNWAPSMELVVGEVLA EV

>HarmPBP2

MAASRWLFARAFCLV LMMG SAMSSKELLTKMTGGFTKVVDACKTELSVGDHIMQDMY NFWREYQLVNRD  
LGCMI MCMTAKLDLIGDDQKMHHGKAEEFAKSHGADDALAKQLVGLIHGCETQHQAIEDHCSRALEIAKCFRT  
KIH ELKWAPSMEVIMEEIMTAA

>HarmPBP3

MGSRHVFFALVVLAVSVRKA EPSKDAMQYITSGFVKVLEECKHELNLNEQILADL FHFWKLEYSLLGRDTGCAII  
CMSKKL DLDANGRMH HGNAAEFAKKHGAGDEVASKIVTIIHECEKKHEQDGDDECLRVLEVAKCFRTGIHEL N  
WQPKVEVIVSEVLTEI

>HarmGOBP1

MPGVL RALLV LAAAAPLLADINVMKDVT LGFGQALDKCREESQLTEEKMEEFFHFWRDDFKFEHRELGC AIQC  
MSRHFNL LTTSSRMHHDNTEKFIQSFPNGEVLARQMVELIHSCEKQFDHEDDHCWRILHVAECFKGSCVQRG  
IAPSMELMMTEFIMEAEAR

>HarmGOBP2

MTSKSCLLLVAMATLTASVMGTA EVM SHVTAHFGKALEECREESGLSAEVLEEFQHFWR EDFEVVHRELGC AI  
CMSNKFSLLQDDSRMH HVMHDYVKSFPNGHVLSEKLVLIHNCEKKYDTMTDDCDRVVKVAACFKV DAKA  
AGIAPEVAMIEAVMEKY

>HarmOBP1

MSKFTFFVLCVAVSLSKVYASDEDKAKLHEALKPLVEECMKDHEVSLDDLKAAKEAKSADGVKPCFLACVYKK  
AEVLNDKGEFDADHALEKLKEFVSEDEV LAKVAEVGNTCKAVNDKAVSDGDAGCERAALLTACFLEHKAEILV

>HarmOBP2

MMDRKRLCLLIAMFLAQGSDAMSRQQLKNSGKMLKKNCMNKNQVTE DQIGSIDKGKFVEDKKVMCIYACI  
FEMTNVVKNNKLN YDASIKQIDL MYPPDLKESAKAAVEKCKDVQKKYKDICEASYWTAKCMYDFKPEDFIFA

>HarmOBP3

MSKFTCFVLCVAVSLGEVRSNALEKAAIRAAVYPLIVDCAKEHAVTLEQLKAAKASHSAEGINPCFQSCVYKKT  
GIFNDNGEYDVANAKTKLQKFV TDEDEYARIAEVGKTCASVNDKSVSDGAAGCERAALLTACFLEHRAQIII

>HarmOBP4

MSKLT CVVFAAVAVVFSNVNADDETRASFRQVLG PLVMECRNEFGITEDDLKKAQQERSPDALKPCFIACVFKK  
FGIITSAGKYDSDASISRIKDVVKNDLLAKLKS VGEKCNVNDASVSDGDAGCERAALLAKCFIENKSEL SI



>HarmOBP5

MSKFTCLVLCVVAASLSQAYASEEEKAAFREAIKPIVEECSKEHGVSHDELKSAKDNQADNIKPCFLGCVYKKA  
VFNSKGEYDVKALEKLLKQFVSNDEAYAKFAEVGKKCASVNDKAVSDGDAGCERGALLTACFLEHKAEPPL

>HarmOBP6

MSKFTCLLLCVAVSLSKVHATEEEKEAIRAAVRPIMQECGKEHGVTLDDLKAAKAAHSADGIKPCFQSCVYKKA  
GIFNDNGEYDIANAKTLLQKFVTNDEEYARIAEVGKMCASVNDKPVTDGAAGCDRAALLTACFLEHRAQIII

>HarmOBP7

MFRFGVLSFVLLFCMESSYALSSEEELSIKEALHPFVVECAEEYGMTEEMFEEAKKKGSAEDIDPCFMSCFLKKT  
GFFDDSGKFDAEKISFAKEHITSESAIKFLEAGAGECVKINDEDVSDGENGCDRAKLLFDCLTELKKKMSSE

>HarmOBP7.2

MSRFGVLSFVLLVFCMENIYALSSEEELSIKEALHPFVVECAEEYGMTEEMFEEAKKKGSAEDIDPCFMSCFLKKT  
GFFDDAGKFDAEKISFAKEHITSETAIKFLEAGAGECVKINDEDVSDGDKGCDRAKLLFDCLTLKKKMSSE

>HarmOBP8

MLLIEIVKFLTLVAMCEAMTMKQIRNTGKMMRKCQPKNNVADEQIDPIAEGVFNEDKEVKCYMACIMKMA  
NTIKNGKLNIEAAIKQADLLLPPDDIKEPAKEAITACRQVADAYKIDICDASFHITKCIYTQNPQIFYFP

>HarmOBP9

MCKFSVFLYSAVMAVNIWSASCISEEDKAAIITAIAPLAQNCGSECGLDNDDFEYKEDGSDMDPCFKACLMT  
QMGVLDKEGKYDGKGLHKAMEEADYPGDKDDAQKFLDELDRCFDAKGDNSGSDEEAKMKRADVLFRCMQ  
DMKEK

>HarmOBP9.2

MCKCSVFLYLAVMAINIWRASCLSEEDKAAIITAIAPLAQNCGSECGLDNDDFEYKEDGSDMDPCFKACLMT  
QMGVLDKEGKYDGKGLHKAMEEADYPGDKDDAQKFLDELDRCFDAKGDNSGSDEEAKMKRADVLFQCMQ  
DMKEN

>HarmOBP13

MFTGTLPVFLATFAYGGKEKPVFSEIIEIQTVHDECVAKTGVAEEDITNCENGIFKEDPKLKYMFCLMEEA  
SLVDDDDAVDYDMLVSLIPEEYVDRTTKMIFSCKHLDTDPDKQRAFEVHKCSYEKDPDLYFLF

>HarmOBP18

MKSFVFCVLVAGAFANVSLPPKQNEKANQIATECMKESGLKPEVLAEAKKGHISDDEHLKFTFCFFKAGIV  
SEDGKLNTEVALAKLPPGVDKAEAEKLETTCKGKTGKDVTDVFEIFKCYHHGKTHILLGF

>HarmOBP15

MGRSRHVFFALVLAHSVKKKPSKHPMPYITSRFVKVLEECQHELKLNHILEHLFHFVKLEYSLLGKDPGCAIIC  
MSTKLDLLDLYGRMHRGNAAEFAKKHAAGDEVPSKIVTIIHFCQKKHEQDGDDECLQVLEVATCCRTGLHDLNW  
QHQVEVIVPDVLTETI

>HarmOBP16

MFKLCVVLAFIVATCHGGTLERTSSTCGQIPRELTACLDLQPAVSPEIQEKRRANECERLTCVFREYNLLDGAEV  
NKERTAFLDNFVKQYPSWEVAIDVAKTSCLRSSGLKPGVFLDCPAYDIIQCVFANLVKNALPSQWSSMSQCN  
HAREFAAACPICPDACFAPLPIGTCNACSAARRSS

>HarmOBP17

MRAWSVTLVALLGALGAARAVAMDEDMAELARMVRENCAEETGADVALVERVNAGADLMPDDKLCYIKC  
TMETAGMMADGEVDIEAVLALLPPELAEHNAPSLRACGTVRGADHCDTAFRTQQCWQNANKADYFLI

>HarmOBP18a

MTRQQLKNSGKLMKKSCMPKNDVTEEEVGDIEKGFIESRNVMCYVACIYTMQVVKNNKLSYEAVIKQVDM  
MFPAEMRDAVKAATSKDITKSKDLCEAYWTAKCMYDYDAENFVFP

>HarmOBP22

MTREQIKNSGKLIKTCMAKNDLSEDQVKDVKDKGFIEEKPFCYIACVYKMGQTIKNTVNHDMMIKQVE  
MMFPNEMKAPMKAIEHCRPVVKKYKDVCEVSYWTAKCIYEFDPNFMFP

>AipsPBP1

MAPHPVMTMYVRLALVIIAGLFITVECSQEIIKNLSLQFAKPLEDCCKEMDLSDTVITDFYNFWKEGYEFTNRQFG  
CAILCLSSKLELLDQDLKLHHGKAQEFAKKHGADEAMAKQLVDMIHSCTQSTPDVADDPCMKTLLNVAKCFVAK  
IHDLKWAPSMDLIMGEVLAEV

>AipsPBP2

MAASRWCIACLVCLFAARSVMTSQEVVASFSKGFNTVVEHCKAEVNAGEHIMQDIYNFWREYQLVNRDLG  
CMVLCMANKLGLIGEDQKMHHAKAEFAKSHGADEAVAKQLVAILYECETKHAAVEDECMALEIAKCFRTK  
MHELKWAPSMEVAMEEIMTAV

>AipsPBP3

MGTYNVFFAFVLMAGVREIEPSKDAMKYITSGFVKVLEECKQELNMNDRIIADLFHYWKLDYTLNLRDTGCAI  
ICMSKLDLLDDTGRMHGNAQEFALKHGAGEEVASKIVTIIHDCEKKFERDDDECLRVLEVAKCFRTGIHDL  
WQPKVEVIVSEVFTDM

>AipsGOBP1

MTQPGQVLVLLAAAAADVNVMKDVTLFGGQALDKCRQESDLTEEKMEEFFHFWRDDFKFEHRELGCAIQ  
CMSRHFNLLTSSRMHHVNTEEFIQSFPNGEVLARQMVALIHGCEKQFDHEDDHCWRILHVAECFKHACVAH  
GVAPSMEMMMTEFIMEAEAR

>AipsGOBP2

MTLRCCLLVVAAVTRSVVGTAEVMSHVTAHFGKALEECRDEGLSAEVLEEFQHFWRDFEVVHRELGCAII  
CMSNKFSLQDDSRMHVNMHDYVKGFPNGEVLGKLVLIHNCEKQYDTLTDDCDRVVKAACFKVDAKA  
AGIAPEVAMIEAVMEKY

>AipsOBP1

MDISKRRSKNAFRLLVNTWLRVQIFTCLSAPPVVSADVTSKCQSKYENECDKLTCVFRKAKWLDGNAVDAKA  
KLITYFEQFEKDHPEWAPAMQNVKTSCLGAELKTQGVFLNCPAYDVMHCVLGSFIKHATPTQWSTSASCSYPR  
AYAAACPICPEDCFSAQVPFGSCNACYLPPRTP

>AipsOBP2

MSKFTCLVLCVVAASISRVHADDANKAAFREAFKILDECSKEHGVSNDDIDAACKAGSADAIKPCFFGCIYKK  
AEVFNAGEYDVSALSCLKKFPDEAKFAKYAEIGKKCASVNEKPVTDGDAGCERGAMLTACFLENRAEMLI

>AipsOBP3

MIRSCRCLVFAAVFQVVLGQGLTGTDSGPPGFQRQPQSYVPKHCFAPPPGVDLHTCCPIQLPDEDMESCGIQK  
LTKEQYENPSPARIPCQESICLLRNANLLKQNSIDYKMGDFVDNWAQMDPDTIPITNAKKVCLIEGGPPAPP  
VCEPDRIFTCLTSYVLWNCKLRLDSGEGCKILKEHMDGCRPFLAGP

>AipsOBP4

MFGYQFLSFAAALICFGSSYALTSEEEANIKEAFHPFIMKCAEEYGITEEQFEEAKEKHSAGIDPCFMSCFMKES  
GFFDSAGKFDADKTKEFVDAHLTSERAITFMEAVGSECAKVNDDEEVDGDKGCDRAKLMWGCIQDLKEKMEG  
SE

>AipsOBP5

MKYFVLFVALVAGIHANVTLPPEQSEKALKTASECIKETGVSKEVLAEAKKGHIADDEGLKFTLCFFKAGIVDN  
DGKLNLETALAKLPPGVDAEAKKVLGECQAKSGKTPQDTAFIYKCYHAGAKTHIALAGI

>AipsOBP7

MSKFTCVLCVVALSLSVYVTRAHKPNLRDAWRSELDECAKEYPVTNDEIDTAVRSGDSSNLNPFNFCVFNKT  
GFFTENGEYDLKNGLIKLRKAIRDDEEYTKFEEVATECTEDKNTSCDEKAKCDSANRLSLCFLRFKDKVRI

>AipsOBP8

MYLRSTNGGVRSPFLGESAYTTKIVEICSKETGLKKQVPPEEKEIKFSQRKGLREFNDCYLAKTGVTSDGKLNIDE  
ALEKLPPGFAKPFVEHCQANIILGYIEENVNDFSTCFHQEVQNHLLSFYGFENYVWMLVLGTSFDKTRFTTLFFD  
KHDFDWAERAGFVNL

>AipsOBP12

MYSGTIFLFSFILLIVSNVTFVSSQMTREQVKNSGKLVKKTCSAKNDLTEDEVKDVDKGFIEEKKFMCYVACVYK  
MGQAVKGNLSLHDMIRQVDMFLPADMKAPVKAIEHCRPVAKKYKDICEASYWTAKCVYEFDPNFMFP

>AipsOBP13

MVLIYIVKFLILVAMCEAMTKQIRNTGKMMRKCQPKNNVEDEKIDPIAEGIFIDEPEVKCYMACIMKMANT  
LKNGLNFDAALKQADLLLPDDIKEPAKEAIIACKKAAEGHKDIDCVSFHVTKCIYNQNP GIFYFP

>AipsOBP15

MDHNRLCLLVIAMFLATGSDAMTRQQKNSGKILKKNMKNKHQVTEHQIGTIEKGFVEDKKVMCIACIYEL  
TSVIKNNKLNYESLRQIDIMYPADLKESAKAAVENCKDVQKKYKDICEASFHTAKCMYDFKPEDFIFA

>AipsOBP16

MFPGSIPFISGCVHLGVSNYFRSTQSNLVVHYEDDQIVDAIYNCQDENGDFEVLNSTNLEENFPEKEGLKSN  
DCFLKKTGFVTS DGKLNIDKTLEKLPPSFVKPIVEHCQANIALNYTTESVENFSSCYHDGILNHIFAATEVGIFPFIQ  
TWKFFVPGTSFADTILILN

>AipsOBP17

MNQLLVFVLIVACVRISNGMTREQVKKMTVIKQKCMKNSVTEHQIGKIEQGVFNEDRNVMCYVACVYKSL  
QVVKNERLDLGLISKQIDALYPPELKEPTKKAQVQCINIQDSYNLCEAVFHSVKCLYEKDPATFIFP

>AipsOBP18

MKTLFVFAACILLAQALTDEQKEKLLKHRTECLTETKVEEALVNKLKGGDYKTESEPLKKYALCMMTKSELMTKD  
GKFKKDALAKVPNAADKPSVEKLIDACLANKGNTPHQTAWNYVKYHEKDPKHAIFL

>AipsOBP19

MFTGTVPFVCLVAVAFGGKDKPVFSEEIIEIQTVHDECVANTGVAEEDITNCENGIFKEDPKLKCYMFCLMEE  
ASLVDDDGTVDYDMLVSLIPDEYYERTTKMIFACKHLDTDPDKCQRAFEVHRCSYEKDPDLYFLF

>AipsOBP21

MLKFSVVCLYFSVAAVNFVNVHCISEDEKKAFFIEMKPMVEECGSDCGLTEEDYKHKSGEDMDPCFKKMM  
QKGLFDEDEGKYNRKQLHESISEYTGDKDEAKRVQEQLDSCFDANGDNDGDDEESQMKRVDVLFKCLKEIKE

>AipsOBP22

MSMWFRAMVVVGALAAARCGVVMDEDMAELARMVRESCVDETGADVKLVEAVNGGADLMEDDKLKYI  
KCTMETAGMMSDGEVDIEAVMALLPPEMAEHNGPALKSCGTQRGADDCDTAWKTQVCWQNANKAEYFLI

>AipsOBP23

MSKFTYLVLCFVAVSRVYANEDERAAFHEAAKPILVECSKENGVSFDKLAKEAGSADGIDPCFFSCVFKKTGVF  
NSKGFDFLDNSLTKLKEFVSNDEYAKVAEVGKKCESVNEKDVSDGEAGCERASLLTACFLEHRAEIPV

>AipsOBP24

MAKLLLAMILVMTFALTMSATTKDAGTKEAIMTTTANQDSSIDSNDVDVLAVMNVCNESFRIEMSYIQALN  
ESGSFVDETDKTPKCFIRCVFENVGIVSEDGRMFNPARAAVIFAGERNGKPMDDIADMTALCAADRKETCPCD  
RSYQFLRCLMSMEIEREYKS

>AipsOBP26

MSKFTCIVLFVVAASLTKVTQAVSEEEKAVAREAMAPILAECSKAEGVSDIEDIEAKKNPSVDAVNCSFIRCVMR  
KTDALNEKGLFSDAALAKIRPFVKSDEDFAKFEEIGKACMSVNDKEVSDGEAGCDRAKLLACFLEHKAEMLY

>SlitPBP1

MANARWRFVFFVYALYLSAVLGSQDLMVKMTKGFTRVDDCKTELNVGDHIMQDMYNYWREYQLINRD  
MGCMLLCMAKKLDLMDDDQTMHHGKTEDFAKSHGADDDVAKKLVSVIHECEQQHAGIADDCMRVLEVAKCF

RTKIHCLKWAPSIEVIMEEVMTAV

>SlitPBP2

MAFCPSVTMSLRVALVVAASLLVVVQASQDVMKNLAVNFAKPLDDCKKEMDLPDSVTTDFYNFWKEGYELTN  
RQTGCAILCLSSKLEILDQELNLHHGRAQEFAMKHGADEAMAKQIVDMIHTCAQSTPDEAADPCMKALNVAK  
CFKLVHELNWAPSVELIVGEVLAEV

>SlitPBP3

MGSRNVFVALVVLTVGMREIEPSKDPMKYIASGFVKVLEECKHELMNDHLIADLFHYWKLEYTLLNRDTGCAI  
ICMGKKLLDLDASGRMHGNAQEFAKKHGAGDEVASQIVQIHDCEKHERDDDECLRVLEVAKCFRTGIHEL  
NWQPNVEVIVSEVLTEI

>SlitGOBP1

MLLLLRALPLLAAVLPLRADVNVMKDVTLGFGQALDKCRQESQLTEEKMEEFFHFWREDFKFEHRELGCAIQC  
MSRHFNLLDTSRMHHENTEQFIQSFPNGEVLARQMVELIHACEKQHDHEEDHCWRILHVAECFKQACVQR  
GIAPSMEMITEFIMEAEAR

>SlitGOBP2

MTSKCCLLLVLMAAATSSVMGTAEVMSHVTAHFGKALEECREESGLSAEVLEEFQHFWRDEFVHRELGCAII  
CMSNKFSLQDDSRMHVNMHDYVKSFPNGHVLSEKLVGLIHNCEKQFDSMTDDCERVVKAACFKVDAKA  
AGIAPEVAMIEAVMEKY

>SlitOBP3

MWMQALVLTATLATLAAAEMDEDEMAELARMVRDNCAGETGVDVALVEKVNAGAELMPDDKLKCYIKC  
TMETAGMMADGEVDIEAVLALLPPSLAEHNAPALRACGTQRGADHCDTAFRTQQCWQNANKADYFLI

>SlitOBP4

MTKVLFAIVLTMITFAVVLASTKEAMTTTMSDQVNSIDVDVLAVMDMCNDSYRIDPTYLQALNESGSFIDETD  
KTPKCFIRCVFENVGIVSEGDGKQFNPARAAVIFAGERNGKPMEDIADMTALCATDRQETCPCDRSYKFLRCLMS  
MEIERYEKS

>SlitOBP5

MSVVRCSLLVAIFCFVSVNAISGDEEAGIKDALRPFVQECADFEFGITEEQFEEAKKASAADIDPCFMSCFLKKA  
EFFDSQGKFDVDSTMAFAKEHLTSEPAMKFVEAVGDECVKINDEDVSDGDKGCDRAKLLFECIAETKKKME

>SlitOBP6

MSKFTCLVLCVAVSLSGVHATAEKEAAEFIEAVKPYVQECSEKHGVTPEDIKSAKAAGNADGINSFLSCVYKKA  
EVITEKGEYDADKALEKLLKFVSNEDDYAKFANIGKKCASVNEKSVSDGEAGCERAALLTSCFLEHKSEISA

>SlitOBP7

MDQKRICLFVIAMFLASGSDAMSRQQLKNSGKMLKKNCMNKIGVTEDQIGSIDKGFIEDRKVMCYIACIYELT  
NVIKNNKLNYEASIKQIDLMPDPVKESAKAAVEKCKDVQKQKDYDICEASFYAAKCMYEFKPEDFIFA

>SlitOBP8

MLLTKIVKFFILVATCEAMTMKQIKNTGKMMRKTQPKNNAEDEKIDPISDGVFIDEKEVKCYMACIMKMANT  
IKNGKLNDAAMKQADLLFPDDIKEPAKEAITACRKVADAHKDICDASFHVTKCIYNHNPGIFYFP

>SlitOBP10

MVRKISGLLCLCVFGISFSDSAISADSESRNPPPTAPQKIERVITLCQDEIKLSILREALDVIKEHTMPAQRRRD  
KREVPFTHDEKRIAGCLLQCVYRKVAVDGYGFPTLEGLVGLYSDGVNERGYFMAVLEASRECLMKNHDKFSRT  
VPMDNGRNCDISFDIFECISDRIGEYCGTSGL

>SlitOBP12

MKTLFVFAACILLAQALTDEQKEKLLKHRTECLTETKVDEELVNKLKGGDYKMDNEALKKYALCMMMKSSELMT  
KDGFKKDVALAKVNPADKPTVEKLIDACLANKGNTPHQTAWNYVKCYHEKDPKHAIFL

>SlitOBP13

MITSCLLVLSAVVQVLLAKQPVFESGPPPEWGPPERTSHPGQFQPRVPKRCWVPPQRINVYNCCPIPTLYPDED  
MQSCGFELSENKPQKPVYRPEGTCKEGYCVMGKFDLLANNSVDYVKFREYLDNWAESYPEFANAIIHIAKEE  
CAQDGGPEVPPICEPKLFLCLTSTIFWNCKLRDGECAALQEHMNECKQYYTRVMAPTIKDFEVR

>SlitOBP15

MYSINCFIFSIVLIVMFDNCFVYSMTREQIKNSGKLIKKTCSAKNDLTEDEVKDVDKGFIEKKDFMCIACVYKM  
GQSVKGSTINHDMMLRQVDMMPNDMKAPVKSIEHCRPVAKNYKDLCEASYWTAKCIYDFDPANFMFP

>SlitOBP16

MYRFVILSIVLVSALADDIDIRECGRIFHPPPHGCCKANNAVKNKDMLAELKDCFDGSGPKDPMKCEIDLCAIK  
KKGATDDGKLDIKKFEEVITKEVGSDDKLLDEIKTNCINGDLNNYGPPEFCDFMKIKHCVTLHMMNHCSSEWS  
DDGNCKVVKELVGKCAKVI

>SlitOBP17

MKTRFLLCCILSIFLFFDQSYGMTRQQLKNSGKLMKKSCMPKNDVTEDEVGDIEKGFIESTRNVMCIACVYTM  
SQVVKNNKLSYEAIVKQVDVMFPAEMRDAVAAAATHCKETTKYKDLCESSYWTAKCMYDYDAQNFVFP

>SlitOBP18

MFKLCVFLALGFVACHGAPNSSPGTPNANPGTYCGVTPDNIYRCLNNPRVVTPEVSTKCGSQFTECEKMTICIFR  
ELKWSKRGAIDKAKVRAVFDQYETEHPWAQAVQHVKAFCLASELRAQGVFLNCPAYDIMQCVLASFIKHASP  
SVWSTATDCAYPKAYAADCPVPCSDCYSPQIPFGSCNACYTQPRTV

>SlitOBP20

MEKILIFTITLSGFAHARISVMYAHDKLSDLVAQQCLSEMYPKNKRIEIQESDEPCIIFCVLKKFGIISASGVINLDIY  
RKRVRQIAHQLDQKTSIMDYGGSCMENAEATQHKQDVCKKAKVFNDCTHLYRILLM

>SlitOBP21

MARRQRGAMFTEALPLFVILVAVTHGGKNKPVFSDEIKEIQTVHDECVAKTGVAEEDITNCENGIFKEDAKLKC  
YMFCLLEEASLVDDDDTVDYDMLVSLIPDEYERTTKMIFACKHLDTPDKDRCQRAFEVHKCSYEKDPDLYLFF

>SlitOBP22

MSKFTCIILCVVAASLTKVSHAAVTEEEKEAFREAMAIIAECSEEHGVSEADIKAAKESASADNIKPCFLGCVMK  
KIEVLDAKGLYDAETGLGKLRKFVKDDDEFKAFEDIAKCKLVNDESVDGEAGCDRAKLVLCGFIEHKVEMPF

>SlitOBP23

MAKFSCLVLCVVAASLSIHVASGESLRESLRPVIVACSQEHEGVTDAEIQAAKDAGSPASIKPCFIACVFKAGFIN  
EQGQLDLETGLKNLRQFVKDDEQYKLEEVAKKCSQVKDKAVSDGAAGCERGVLLAGCFLEHKTSIII

>SlitOBP25

MAKVTCIVLVVGVSLSSIQADDGKNESEVEIDVNQIIDDCEEYHIPRRLFLAAAETGSTHALTPCFWSCCFKGV  
GVLNSEGQYDIDATLDSKKIFTDHEYEKVEIIVKKCESVNGAPVSNNGNIECEKSVLLADCLFDNAKHFPMFVG  
VDY

>SlitOBP27

MYKFVILCSIFVAASNADVAQTLTKRETASLKLPLSVCCDIPELADEFQLAKCSPRPPGPCEDVQCIFEVSGFLTDR  
NTLNKAAYRSHLQKWEKNHPGWTDSEYKAITDCVDNDPRQHLEVPCKAYDVFTCTGIAMLLKCPDTAWKC

>SlitOBP28

MIVRFLCLYIVEFYGAHARTDQEIKAFFFREGMDCNIEHPISPKEMLELKENKIPDTNNAKCFVACVFKKTGML  
DSKGMFDAENSIAMTQKDFANDPNRLESSKLLACKKVNDEAVSDGEKGCERSVLLHKCFVETAPQLGIKLP

>SlitOBP29

MWNLLVFLAICSCVYARRRSSGAEINGLTEEELKMEFTKLIMKCNKDGEVDMTELVQLQNYVVPTKQSTKCVL  
ACAYKAAEVMNAKGEYDIDHAYKVAEMMKNGDEKRLVNAKMMADLCVKVNELSVSDGEKGCDDRAAMIFKCT  
VENAPKFGFKL

>SlitOBP33

MTCSQALALLALVAISQQATTGCKNCIMLGKEEKAMFRAHSDACVAASRVEPRLVDAMLAGELLDEPALRKHV  
YCVLLKCKLISKDGLKQAAVLGKMAARPDANKATKVLESCADQGTGDPEDLAWNLFRCGYDKKALLFDYMP  
NVASETDNNS

>SlittoPBP1

MANARWRFVFFVYALYLSAVLGSQDLMAKMTKGFTRVDDCKTELNVGDHIMQDMYNYWREDYQLINRD  
MGCMLLCMAKKLDLMDQTMHHGKTEDFAKSHGADDDVAKKLVSVIHECEQQHTGIADDCMRVLEVAKCF  
RTKIHCLKWAPSMEVIMEEVM TAV

>SlittoPBP2

MSLRVALVVAASLLVVVQASQDVMKNLAINFAKPLDDCKKEMDLPDSVTTDFYNFWKEGYELTNRQTGCAILC  
LSSKLEILDQELNLHHGRAQEFAMKHGADEAMAKQIVDMIHTCAQSTPDVAADPCMKTNLVAKCFKLVHEL  
NWAPSVELIVGEVLAEV

>SlittoPBP3

MGRNVFVALVLTAMRETEPSKDPMKYIASGFVKVLEECKHELMNDHLIADLFHYWKLEYTLLNRDTGCA  
IICMGKLLDLLDANGRMHHGNAQEFAKKHGAGDEVASQIVQIIHECEKKHERDDDECLRVLEVAKCFRTGIHEL  
NWQPNVEVIVSEVLTEI

>SlittoGOBP1

MLLLLALPLLAAVLPLRADVNVMKDVTLGFGQALDKCRQESQLTEEKMEEFFHFWRDDFKFEHRELGCAIQ  
MSRHFNLLTSSRMHHENTEQFIQSFNGEVLARQMVELIHACEKQHDHEDDHCWRILHVAECFKQACVQR  
GIAPSMEMMITEFIMEAEAR

>SlittoGOBP2

MATVTSSVMGTAEVMSHVTAHFGKALEECREESGLSAEVLLEEFQHFWRDDFEVVHRELGCAIICMSNKFSLQ  
DDSRMHVNMHDYVKSFPNGHVLSKLVGLIHNCEKQFDSMTDDCERVVKAACFKVDAKAAGIAPEVAMI  
EAVMEKY

>SlittoOBP1

MFKLCVFLALGFVACHGASNSNPGTPNANPGTYCGVTPDNIYRCLNNPRVVTPEVSTKCGSQFTECEKMT  
RELKWSKRGAIKAKVRAFDQYETEHPEWAQAVQHVKAFLASELRAQGVFLNCPAYDIMQCVLASFIKHAS  
PSVWSTATDCAYPKAYAADCPVCPDCYSPQIPYGCNACYTQPRTV

>SlittoOBP2

MVRKISGLLCLCVFGISFSDSAISADSESRNPPPTAPQKIERVITLCQDEIKLSILREALDVIKEEHTMPAQRRR  
KREVPFTHDEKRIAGCLLQCVYRKVKAVDGYGFPTLEGLVGLYSYDGVNERGYFMAVLEASRECLMKNHDKFSRT  
VPMDNGRNCDISDFIFECISDRIGEYCGTSGL

>SlittoOBP3

MKSFVVICIVFVVGVCATEKGNKIASCEIKESGVKSDVLAEAKKGNLGGDDPAFKEFTYCFKKGIVGEDGKLN  
VAIAKLPSGVDKAEAEKLLDSCSKTGKDAVETVYEIFKCYQHGTSHIMFAS

>SlittoOBP4

MKTLVFAACILVAQALTDEQKEKLRTECLTETKVDEQLVNKLKGGDYKMDNEALKKYALCMMMKS  
KDGKFKKDALAKVNPADKPTVEKLIDACLANKGNTPHQTAWNYVKCYHEKDPKHAIFL

>SlittoOBP5

MTKVLFAIVLTMVTFVAVLSASTKEAMTTTMSDQVNSIDVDVLAVMDMCNDSYRIDPTYLQALNESGSFID  
DKTPKCFIRCVFENVGIVSEGDGKQFNPARAAVIFAGERNKPMEDIADMTALCATDRQETPCDRSYKFLRCLM  
SMEIEREYKS

>SlittoOBP7

MFTEALPLFVILVAVTHGGKKNPVFSDEIKEIQTVHDECVAKTGVAEEDITNCENGIFKEDAKLKYMFCLLEAS  
LVDDDDTVDYDMLVSLIPDEYYERTTKMIFACKHLDTDPDKRCQRAFEVHKCSYEKDPDLYFLF

>SlittoOBP10

MKEGNRYSHERRITNDSGDQLMVINATDDDDYSGYGSGNMGEKLLTSVPRPATPSNNINKNNINRTRKNEPLL  
RPDSDQCLSQCVFANLQVVDKGPVREAEELWNVQSSVTSQQSRSALHDQIQACFQELQSEAEDNGCSYSNKL  
ERCLMLRFSRDKVDGKGNNAKKSSTEQTG

>SlittoOBP11

MSKFTCLVLCVAVSLNGVHATAEKEAAFIEAVKPYVQEQSKEHGVTPEDIKSAKAAGNADGINSFLSCVYKKA  
EVINEKGEYDVKALEKLLKFFVSNEDDYAKFANIGKKCASVNEKSVSDGEAGCERAALLTSCFLEHKSEISA

>SlittoOBP12

MSVVRCSFLVALFCFVSVNAMSGDEEAGIKEALRPFVQECADFEFGITEEQFEEAKKASAADIDPCFMSCLFKK  
AEFFDSQGGKFDVDSTMAFAKEHILTSEPAMKFVEAVGDECVKINDEDVSDGDKGCDRAKLLFECIAETKKKME

>SlittoOBP13

MITSSLLVLTAVVQVLFQAQQPVFESGPPPEWGPQRPAHRRQFLPRIPKRCWVPPQRINVYNCCPIPTLYPDED  
MQSCGFECTSGNTDQPQKPVFRPEGTCKEGYCVMGKFDLLFANNSVDFVKFREYLDNWAESYPEFANAIRIAK  
QECAQDGGPEVPPICEPDKLFLCLTSTIFWNCKLRDGDGCAALQEHEMNECKQYYTRQMEPTMKDIEVR

>SlittoOBP14

MDQKRICLFVIAMFLASGSDAMSRQQLKNSGKMLKKNKCMNKIGVTDDQVGSIDKGFIEDRKVMCYIACIYEL  
TNVIKNNKLNIEASIKQIDLMYPPDVKESAKAAVEKCKDVQKYYKDICEASFYAAKCMYEEKPEDFIFA

>SlittoOBP15

MFNNCFVYSMTREQIKNSGKLIKTCASAKNDLTEDEVKDVDKGFIEKKDFMCYIACVYKMGQTVKGSTINHD  
MMLRQVDMFMFNDMKAPVKAIEHCRPVAKNYKDLCEASYWTAKCIYDFDPANFMFP

>SlittoOBP16

MLAEELKDCFDGSGPKDPMKCEIDLCAKKGKGFATDDGKLDIKKFEEVITKDVGSDKDLLDEIKTNCINGDLNNY  
GPPEFCDFIKIKHCVTLHMMNHCEWSDDGNCVVKELVGKCAKVI

>SlittoOBP17

MRTFRLLCCILSIFIFDQSYGMTRQQLKNSGKMLKKSMPKNDVTEDEVGDIEKGFIEKTRNVVMCYIACVYTM  
SQVVKNNKLSYEAVIKQVDVMFPAEMRDAVAAAATHCKETTKYKDLCESSYWTAKCMYDYDAQNFVFP

>SlittoOBP18

MILXYTQKLTNMLLTIVKFFILVATCEAMTMKQIKNTGKMMRKTQCPKNNVEDEKIDPLSDGVFIDEKEVKCY  
MACIMKMANTIKNGKLNDAAMKQADLLFPDDIKEPAKEAITACRQVADAHKIDICDASFHVTKCIYHNHNSIFY  
FP

>SlittoOBP20

MWVQALVLTATLVTLVAAVEMDEDMAELARMVRDNCAGETGVDVALVEQVNAGAELMPDDKLCYIKCT  
METAGMMADGEVDIEAVLALLPPSLAEHNAPALRACGTQRGADHCDTAFRTQQCWQNANKADYFLI

>SlittoOBP22

MNRLLLVYLVLYAGCSYGMTRAQVKKTMGIIKNCMPKNSVTEEQVGRIEQGVFIEDRNVVMCYIACIYKSLQ  
VVKNDKLDMALITKQIDILYPPELKEPVKKSVAACFHSQDNYSDFCEGVFYASKCLYEKDPASFIFP

>SlittoOBP26

MFNSSVFMVCLYFCALTPYLVSAMTAEQKALIEHEHFETIGKSCNKDSTMITAEDIANLRAKKIPTGNAPCFLAC  
MMKQIGVMDDNGMVQKETALEMAKAVFDDPEEIKAIEDYLHSCSHINTESVSDGAAGCERAMLAYKCMTEN  
ASKFGFDI

>SlittoOBP25

MSKLSIVFCAMRLCVFVASEDANSIFHAPIKPIVIDCAKEYGLSEDDIKNRGLDGLKNLPPCFIRCVLNKLDI  
NDKGQYDADSGIATIKGLMSNNEYLEKISGVLKECESVNEKSVSDGDAGCERALLGAMCYLDHKTIVLA

>SlittoOBP24

MYKIISLVFCIAVCLNRVHGNAEDKIAIMTAVKPFVEECAKKGVTFEALLTAKASGKIDGVEPCFYSCVYKKEFL  
NSKGEYDVRTALAKLKKYISNDDYAKLSQVGKRCASVNSKPVGDGEAGCERGVLLTQCFLDHKGSVPM

>SlittoOBP28

MIVRFLLCYIVIFYGVHVQARTDQEIKAWFFREGMDCNIEHPISXKEMLELKENKIPDTNNAKCFVACVFKKTG  
MLDSXGMFDAENSIAMTQKDFANDPNRLESSKKLETCCKVNDVSDGEKGCERSVLLHKCFVETAPQLGIKL  
P

>SlittoOBP23

MAKLSCLVLCVVAASLSIHAVKGESLRESLRPVIVACSKEHGVTDAEIQAAKEAGSPASIKPCFIACVFKKAGFIN  
EQGQLDLETGLKNLRQFVKDDEQYKQLEGVANKCSPVKDKAVSDGAAGCDRGVHLAGCFLDHKTSIII

>SexiPBP1

MAGAKWQFVCVVFALYLTSAALGSQELMMKMTGKFTKVVDDCKAELNAGEHIMQDMYNYWREDYQLINR  
DLGCMILCMAKKLDLDMEDQKMHHGKTEEFAKSHGADDEVAKKLVSIHECEQQHAGIADDCMRVLEISKCFRT  
KIHCLKWAPNMEVIMEEVMTAV

>SexiPBP2

MAFCRSATMSVRVALVVAASMLVVVQASQDVMKNLAINFAKPLDDCKKEMDLPDSVTDDFYNFVWKEGYELT  
NRQTGCALCLSSKLEILDQELNLHHGRAQEFAMKHGADEMAKQIVDMIHTCAQSTPDVAADPCMKTNLVA  
KCFKLKIHNLWAPSMELIVGEVLAEV

>SexiPBP3

MGSHNVFVALVLLAVGMRVAEPSKDAMKYITSGFVKVLEECKQELNMNDHIIADLFHFWKLEYALLSRDTGCVI  
ICMSKLDLLDANGRMHHGNAQEFAKRHGAGDDVASKIVQIIHDCEKKHERDDDECLRVLEVAKCFRTGIHDL  
DWQPKVEVIVSEVLTEI

>SexiGOBP1

MLFLLRALPLLAAVLPLRADVNVMKDVTLGFGQALDKCRQESQLTEEKMEEFFHWRDDFKFEHRELGCALQC  
MSRHYNQLTSSRMHHDNTEQFIKSPNGEVLARQMVELIHSCEKQYDHEDDHCWRILHVADCFKQGCQVR  
GIAPSMEMMMTEFIMEAEAR

>SexiGOBP2

MTAEVMShVTAHFGKALEECREESGLSAEVLEEFQHFWRDFEVVHRELGCAIICMSNKFSLQDDTRMHV  
NMHDYVKGFPNGHVLSEKLVLIHNCEKRFDSMTDDCERVVKAACFKVDAKAAGIAPEVAMIEAVMEKY

>SexiOBP1

MSKFTCLVLCVAGCLSGVHATAEKAALIEAVKPYIQECSKEHGVTPEDIKSAKEAGNADGINACFLRCVYNKA  
GVINDKGEYDADKALEKLFVSNEDDYAKFAEIGKCASVTETSVDGEAGCERAALLTSCFLEHKSEVHA

>SexiOBP2

MKSFFVFCIVLVGVCANEKGNKLDPRFASECIKETGVKNELLEAAKGIISEDPAFKAFTYCFKKIGIVGEDGLL  
NRDVAIAKLPSGVDKSEAEKLLDSCSKTGKDAVDTVFEIFKCYQQGTKSHIMFAS

>SexiOBP3

MVKLTCVVFCAMALSVMFVAGEDANSVFQGAIKPLIAECAKEYKLSDEELLKNRGLAGLSNLPPCFIGCVLKKF  
DIINDKGLYDAEAGIAKIEKLLPNEFLDKISGVLKSCESANEKSVGDGDAGCERAVLVATCYLEHKTAVIA

>SexiOBP4

MWNFLVFLAICSCVYGLTEELKMEFTKLIMKCNKDGKVDMTLVQLQNYVPTKQTTKCVLACAYKAAEVM  
NAKGEYDIDHAYKVAEMMKNGDEKRLVNAKMMADLCVKVNEQSVSDGEKGCRAAMIFKCTVENAPKFGFK  
L

>SexiOBP5

MTMKQIRNTGKMMRKTCPKNNVEDEKIDPIAEGVFIDEKEVKCYMACIMKMANTIKNGKLNDAAIKQAD  
LLLDDIKEPAKEAITACKKVADAHKDICDASFHITKCIYNHNP GIFYSP



>SexiOBP6

MLGSLLFVFAFSVFLGAEALLIDDLKQKYADSIHQCSQQYPLDRADAELLQNKVMPDKESTKCLFACVYKVTGV  
MSDQGELSVVEGNALSQKYLADDPEKLLKSEEFTEACRTVNDAPVSDGARGCDRAALFKCTIEKSPDFSV

>SexiABP1

MSVVRYSSFVVALFCLVSVNAMSGDEEAGVRDALRPYVQECADYEGITEEQFEEAKKASADDIDPCFMSCLK  
KAEFFDAQGKFDVSTMAFAKEHLSSEPAMKFVEAVGDECVKINDEDVSDGDKGCDRAKLLFDCIAETKMKM  
D

>SexiOBP10

MDRKRICLFVIAMFLASGSDAMSRQQLKNSGKMLKKNMKNKIGVTEQVGSIDKGFIEDRKVMCIACIYEL  
TNVIKNNKLNIEASIKQIDLMYPPDIKESAKAAVEKCKDVQKKYKDICEVSFYAAKCMYEFKPEDFIFA

>SexiOBP8

MARRQQGAMFTETLPLFVILVAVTHGGKDKPVFSDEIKEIQTVHDECVAKTGVAEEDITNCENGIFKEDAKLKC  
YMFCLLEEASLVDDDDTVDYDMLVSLIPDEYERTTKMIFACKHLDTDPDKRCQRAFEVHKCSYEKDPDLYFLF

>SexiOBP9

MKTLFVFAACILLAQALTDEQKEKLLKHRTECLSETKVDEQLVNLKGGDYKTESEPLKKYALCMMMKSSELMTK  
EGKFKKDVAKVPNPADKPTVEKLIDACLANKGNTPHQTAWNVYKCYHEKDPKHAIFL

>BmanPBP1

MSIKGQIALALMVYMAVGSVDASQEVMMKNLSLNFVKALDECKKEMTLTDAINEDFYFWKEGYEIKNRETGC  
AIMCLSTKLNMLDPEGNLHGHNAMEFAKKHGADETMAQQIDIVHGCEKSTPANDDKCIWTLGVATCFKAEI  
HKLNWAPSMDEVAVGEILAEV

>BmanPBP3

MARYNIVVAVLVLGVVGARGSSSEAMRHIAATGFRVLDECKQELGLTDHILTDMYHFWKLDYSMMTRETGCAIIC  
MSKKLDLIDGDGKLLHGHNAQAYALKHGAATEVAAKLVEVIHGCEKLVHESIDQCSRVLVAKCFRTGVHELHW  
APKLDVIVGEVMTEI

>HassPBP1

MNFAKPLEDCCKEMDLPDSVTTDFYFWKEGYEFTNRQTGCAILCLSSKLELLDQEMKLLHGHGAQEFKKGH  
ADDAMAKQLVDLIHGCSRSTPDVTDPCMKALNVAKCFKAKIHELWAPSMDLVVGEVLAEV

>HassPBP2

MMGSAMSSKELLTKMSEGFTKVVDACTQLNVGDHITQDMYFWREEYQLVNRDLGCMIMCMVAKLDLIG  
DDQKMHHGKAEFAKSHGADDVLAKQLVSLIHSCEQHQAIEDHCSRVLVIAKCFRTKIHELKWAPSMVEVME  
EIMTAA

>HassPBP3

MGSRHVFFAFVAVLAVSVRKAEPSKDAMQYITSGFVKVLEECKHELNLNEQILADLFHFWKLEYSLLGRDTGCAII  
CMSKKLDDLIDANGRMHGHNAAEFAKKGAGDEVASKIVTIIHECEKKHEQDGDDECLRVLEVAKCFRTGIHED  
WQPKVEVIVSEVLTEI

>HassGOBP1

MDINVMKDVTLGFQALDKREESQLTEEKMEFFHFWSDDFKFEYRELGCAIQCMSRHFNLLTDSSRMHHD  
NTEKFIQSPNGEVRLARQMVLIHSCEKQFDHEDDHCWRILHVAECFKGSCVQRGIAPSMELMMAEFIMEAE  
SL

>HassGOBP2

MTSKSCLLLVAMATLTASVMGTAEVMSHVTAHFGKALEECREESGLSAEVLEEFQHFWRDFEVVHRELGCAII  
CMSNKFSLQDDSRMHVNMHDYIKSFPNGHVLSEKLVLIHNCEKDYDTMTDDCDRVVKAACFKVDAKA  
AGIAPEVAMIEAVMEKY

>HassOBP3a

MSKFTCFVLCVLAVSLAEVRSNALEKAAIRAALYPLIVDCAKEHSVTLEQLKAAKAAHSAQGINPCFQSCVYKKT  
GIFNDNGEYDIANA KTKLQKFVTD EDEYARIAE VGTKCASVNDKSVSDGAAGCERA ALLTACFLEHRAQIII  
>HassOBP17

MKTFVILAACV MLVQASGLTDEQKEK LKKHRSECLTETKVDEQLVNK LKGGDYKTESEPLRKYALCMMM KSEL  
MTKD GKFKKDVALAKVPNAADKPTVEKLIDACLANKGNTPHQ TAWNYVKCYHEKDPKHAIFL  
>HassOBP7

MSRFCVLSFV VLLFCMENIYALSSEEELSIKEALHPFVVECAEEYGMTEEMFEEAKKKGSAEDIDPCFMSCFLKKT  
GFFDDAGKFDAEK SISFAKEHITSESAIKFLVAGAGECVQINDEDVSDGDKGCDRAKLLFDCLTDLKKK LSE  
>HassOBP13

MFTGTLPLV VFLATFAYGGKEKPVFSEIKEI IQTVHDECVAKTGVAEEDITNCENGIFKEDPKLKCYMFCLMEEA  
SLVDDDDAVDYDMLVSLIPEEYVDRTTKMIF SCKHLDTPEKDR CQRAFEVHKCSYEKDPDLYFLF  
>HassOBP1

MCKLTCLVLA AVVFSNVNADDEPRASFRQMLGPFVMECKKEFDITEDDLKKAQ QEHS PDALKPCFIACVFK  
KFGIITSAGKYDSDASISRIKDVVKNDDLFAK LKSVTEKCNVNDASVSDDDAGCERA ALLAKCFIENKSEISFN  
>HassOBP2

MLNLFIVV LALCSSLVAVYALTEEEELK LKFTKLIMKCNKDSEVDMQELVQLQSYVVP TKTATKCVLACAYKAASVM  
NAQGLYDIDHAYKVAEMMKNGDEKRLTNAK KMTDICVKVNDIKVSDGEKGC DRAALIFKCTVDNAPKFGFKL  
>HassOBP3

MSRQQLKNSG KMLKKNCMSKNQVTE DQIGSIEKGFVEDKKVMCYIACIFEMTNVIKNNK LNYDASIKQIDL  
MYPPDLKESAKAAAECKD VQKKYKDICEASYW TAKCLYDFKPEDFIFA  
>HassOBP4

MSKFTCLLL CVVAVSLSKVHATEEEKEAIRA AAVRPI MEACGKEHGVTLDDLKAAKAAHSADGIKPCFQSCVYKKA  
GIFNDNGEYDIANA KTKLQKFVTNDEEYARIAAVGKTCASVNDKPVTDGAAGCDRA ALLTACFLEHRAEIII  
>HassOBP5

MSKFSCLVLCVVAASLSQAYASEEEKAAFREAIKPIVEECSKEHGVSHDELKSAKDNQ NADNIKPCFLGCVYKAE  
VFNSKGEYD VDKALEK LKKFVSNDEAYAKFAE VGGK CASVNDKAVSDGDAGCERGALLTACFLEHKA EVPL  
>HassOBP9

MCKFSVLF LYSAVMAVNIWSASCISEEDKAAIITAIAPLAQNCGSEGLDND DFEKYKEDGSDMDPCFKACLMT  
QMGVLDKEGKYDGKGLHKAMEEADY PGDKDDAQKFLDELDRCFDAKGDNSGSDEEAKMKRADVLFQCMQ  
DMKEK  
>HassOBP16

MFKSIVFCALVIVASHADV LKKRDSKGASL KPLSVCCDIPELGD PKNLEKCSNPKMPGPCDDIQCISEASGFLIDR  
NTLNVDAYKAHLTKWEEEHKSWKVAVDRAIEECANNQTRQYLDFPCKAYDVFTCTGIAMLKKCEAAWKC  
>MsexPBP1

MKVAVVAIVVYLAVGNVDSSPEVMKNLCLNFGKALDECKAEMNLSDSIKDDFANFWVEGYEVSNRDTGCAIL  
CLSKKLD MIDPDGKLHHGNAM EFAKKHGADEAMAKQLLDIIHNCENSTPPNDACLKTL DIAKCFKKEIHKLN  
WAPNMDLVVGEVLAEV  
>MsexPBP2

MVSTKWRLLVVTIAVLTMEMVSASQEV LKQMSVGF SKVLQTCKTELSVGDHIIQDFYNYWRE DYDLLNRDFGC  
MVICMAVKHDLINDQLTMH HGNAHAFAKTHGADDDTAQQLVTILRECEAKHQSVEDVCNRALEMAKCFRTK  
IHELKWAPAMEVVLEEIMTSV  
>MsexPBP3

MAIIPFTVLLMMTAVKEIAPSSDAMRHIANGFLKVL DQCKHELGLTDQIVVDLYQFWKLQYALLNRDTGCAIIC  
MSKKLDLLDSTGRMHGNTQEFVSHGATDEVASKVVVIIRDCEKQ QEGEEDDCVRVLEVAKCFRTAIHELNW

APNMEVVVDELLTER

>MsexGOBP1

MGQDTRSLVLVVLVGLVAVSADVQVMKDVTLGFGQALEQCREESQLTEEKMEEFFHFWREDFKFEHRELGC  
ALQCMSRHFNLLTDSSRMHHENTDKFIKSPNGAVLSKTMVELIHNCQLQHDAAEDHCWRILRVAECFKISCTK  
AGIAPSMSEVMMAEFIMELKQ

>MsexGOBP2

MVNRILMLVVVVFITDSVMGTAEVMSHVTAHFGKALEECREESGLPVEVMDEFKHFWRDEFVHRELGCAL  
CMSNKFELLQDDTRIHHVKMHDYIKSPNGQVLSEKMOVLIHNCEKQYDDIADDCDRVVKVAACFKKDAKKE  
GIAPEVAMIEAVIEKY

>MsexABP1

MSVISFFVLCFVGLAVSVGAVSENERNQISQSILPHIVKCSQEYGVSEGQIKDAKESVNPLGLNPCFLGCVLKSAGI  
IDKNGLFDVEATKEKSKKYISSEKDVTFNFDKIIKDCTEVNQKNVSDGNKGCRAKELVTCFLAKRGDFSFTF

>MsexABP2

MDRKDLCLLIIFILADGVDSMSKQQLKNSGKMFKKQCMGKNKVTEDEIGEIDKGRFVEQQNVMCIACIYQ  
MSQVVKNKLNLYEASLKQIDIMYPPELKDTAKGALEACKDIAKKNKDLCEASFKTAKCMYEYSPKDFLFP

>MsexABP3

MITATLHVVFALLGFVYGAKNKPVFSEEIKEIIQTVHDECVGKTGVSEEDIANCENGIFKEDVKLKYMFCLEVA  
GLADEDGTVDYDMLVSLIPEEYSERASKMIFACNHLDTPEKDKQRSFDVHKCTYEKDFEYFLF

>MsexABP4

MFRYIFCAICLILIFDASYAMSRQQLKNSGKMMKSCIPKNDVTEDEVGQIEQGKFIEDRRVMCIACIYTMQ  
VVKNNKLSYDAIVKQVDMMPPEMRTAVKTAENCKDIAKKYKDICEASYWTAKCMYDFDSKNFVFP

>MsexABP6

MKVVTNGLFLVFLSVLACGIAASPKIYRIPPQASEKIVEEVKCVQKMGDSTVVNLLKEGKYTEDDRVIETLMC  
SNQNVGNVNGDGKVNIDKVMNDIFSINKPEIRSALVACEKDGKSPLETFFKNFILCFKEKVPVKVML

>MsexABP7

MQACLFTLVAVVGLNAHNVHLTDGQKEKANEPAAICIKETGKPEVIAEAKKGHYSEDEAMKKFILCFFHKAGI  
VNADGKLNLDVAIAKLPPGVDKTEATKTEGCKDNGGKDAADPAFAIFKCYKDATKTHVLF

>MsexABP8

MKALLVLAACLVAQALTDEQKEKLLKHKSECLSETKVEEQVLNKLKAGDYKAENDNLKKYALCMMMKSSELMT  
KEGKFKDVALSKVNPADKPMVEKLIDTCLANKGNTPHQTAWNYVKYHEKDPKHAIFL

>MsexABPX

MISSLVHVLTLAAGALALDEEQAEELARMVRENCVDEIGVDEGLLAKVDDGADLMPDPKLCYLKCTMEMAG  
MISDGVVDVEAVLGLLPDDVKLRRTDIVRACDTQKGADDCDTAFLTQTCWQQANRADIYFI

>MsexOBP10

MIRAVVFCCCMVALMPFSANAMTDEQKEKIHEHFEKLGCLKEYTITEDDIKDLRAKKVPSGENAGCFLACM  
MKEIGVLNDEGMLEKGRAMELAKEVFDAAEELKKIEESMHSCSSVNSESVGDGEKGCERAMLAYKCMVENAS  
KGFDFI

>HvirPBP1

MMSVRLMLVVAVWLCLRVASQDVMKNLSMNFAPLEDCCKEMDLPDSVTTDFYNFWKEGYEFTNRHTGC  
AILCLSSKLELLDQEMKLHHGKAQEFKKGHADDAMAKQLVDMIHGCSQSTPDATDDPCMKALNVAKCFKAK  
IHELNWAPSMELVVGEVLAEV

>HvirPBP2

MMGSAMSSKELLTKMTGGFTKVVDHCKTELNVGDHIMQDMYNFWREEYQLVNRDLGCMIMCMTAKLDLV  
GDDQKMHHGKAEEFAKSHGADDALAKQLVGLIHGCETQHQAIEDHCSRTLEVAKCFRTKIHELKWAPSMIEVI

MEEIMTAA

>HvirGOBP1

MPGVLRALLLLAAAAPLADVNMKDVTLGFGQALDKCREESQLTEEKMEEFFHFWRDDFKFEHRELGCALQC  
MSRHFNLLTSSRMHHDNTEKFIQSFPNGEVLARQMVLIHSCEKQFDHEEDHCWRISHLADCFKSSCVQRGI  
APSMELMMTEFIMEAEAR

>HvirGOBP2

MTSKSCLLVAMVTLTTSVMGTAEVMSHVTAHFGKALEECREESGLSAEVLEEFQHFWRDFEVVHRELGCALC  
CMSNKFSLQDDSRMHVNMHDYVKSFPNGHVLSEKLVLIHNCEKKYDTMTDDCDRVVKAACFKVDAKA  
AGIAPEVTMIEAVMEKY

>HvirABP1

MSKFSCLVLCVVAASFQAFASEEEKTAFREAIRPIVEECSKEHGVSHDELKSAQENQNADNIKPCFLGCVYKKE  
VFNSKGEYDVKALEKLGKGFVSNEAAYAKFAEVGKKCVTVNDKPVSDGAGCERGAMLTACFLEHKAEVPL

>HvirABP2

MSRFLLSFVVMIIYLSIHALSSDEESSIKEALHPFVVECAEYGITEEMFEEAKKGSAAEDIDPCFMSCLKKA  
FDGAGKFDVEKTMSFAKSHITSEPAIKFLEAAGGACVKINDEDVSDGDQGCRAKLLFDCLMELKKKISE

>HvirABPX

MCARSLTLVTLAALGAARAVAMDEDMaelarmvrencaetgADVAlvervNAGADLMPDDKLKCYIKCT  
METAGMMADGEVDIEAVLALLPPELAEHNAPSLRACGTVRGADHCDTAFRTQQCWQNANKADYFLI

>HvirOBP2

MMGSAMSSKELLTKMTGGFTKVVDHCKTELNVGDHIMQDMYNFWREEYQLVNRDLGCMIMCMTAKLDLV  
GDDQKMHHGKAEFAKSHGADDALAKQLVGLIHGCETQHQAIEDHCSRTLEVAKCFRTKIHELKWAPSMEVI  
MEEIMTAA

>HvirOBP0021

MDRKKMCLLIAMFLAIGCDAMSRQQLKNSGKMLKKNCMNKNQVTEdqIGTIDKGFVEDKKVMCYIACIYE  
MTNVIKNNKLNyDASMKQIDLMyPPDVKDSAKAAVEKCKDVQKkyKDICEASFWTAKCMYDFKPEDFIFA

>MbraPBP1

MTYSKWRLSCLVCVIFVASSVMASKELITKMSSGFTKVVDQCKNELNVGEHIMQDMYNFWREEYELLNRDLG  
CMVMCMANKLDLIGEDQKMHHGKAADFAKSHGADDQAKQLVGVHDCENTHQGVEDACSRALVAKCF  
RSKMHELKWAPSMEVIMEEIMTAV

>MbraPBP2

MALHRSTTMSVRLALVAIASLFIveCSQEIMKNLSMNFakPLEdCKKEMDLpDSVTTDFYNFWKEGYEFTNR  
QTGCAILCLSSKLELLDQELKLHHGKAQEFaQKHGADEAMAKQLVDLIHGCTQSTPDVAADPCMkALNVAMC  
SKTKVHELNWAPSVELIVGEVLAEV

>MbraGOBP2

MTSKSSLFLVVLATVTSVMGTAEVMSHVTAHFGKALEECREESGLSAEVLEEFQHFWRDFEVVHRELGCALC  
MSNKFSLQDDSRMHVNMHDYVKSFPNGEVLsgTLVELIHNCekkyDGMtDDCDRVVKAACFKVDAKAA  
GIAPEVAMIEAVMEKY

>AperPBP1

MLGKISLLLLPVFAINLVHSSPEIKNLSQNFCKAMDQCKQELNIPDSVIADLYNFWKDDYVMTDRLAGCAINC  
MATKLDVVDPDGNLHHGNAKEFAMKHGADASMAQQLVDIHGCEKSAPPNDKCMKTIDVAMCFKKEIHKL  
NWVPDMDVVLGEVLAEV

>AperPBP2

MIRKVLVLLAVLMTINLGQASPEVMKNLCMNYGKAMDQCKQELNLPDSVIADLYNFWKDDYVMTDRLAG  
CAINCLSTKLDIVDPGNLHHGNAKEFAMKHGADDGMAHELVDIIHGCEKSSPPNDKCIKTMDIAMCFKKEI

HKLNWVPNMDLVVGEVLAEV

>AperPBP3

MIAKTFNLLVIVYLSTNTAVDSSQDVMKSMTLTFTKGLDACKKEMDLPDTIDVDFNFWKEDYVVTNRNAGCA  
IMCLASKVDLVDSMGILIHGSSHEFAKQHGADDNMAKQLSDTLHSCEKTIGTLNDECLRALNVANCFKVEIHKL  
DWAPSMDLIIGEILAEI

>AperGOBP1

MAHTLQTVVLLLGTSILHPILADVNVMKDVTLGFGQALEKCREESQLTEEKMEEFFHFWSEDFKFEHRELGCAIL  
CMSRHFNLLTSSRMHHTNDKFIKSPNNEVLSKHMVNLIHSCEQQHDADLDHCWRILVAECFKRSCQEA  
GVAPSMELLMMAEFIMESEIN

>AperGOBP2

MGYKLLMYIAIVDSVIGTAEVMSHVTAHFGKALEECRDESGLSPEILNEFKHFWSEDFDVVHRELGCIIICMS  
NKFSLLKDDTRIIHVNMDHYVKSFPNGEVLSAKMVNLIHNCEKQYDDITDECDRVVVAACFKVDKKEGIAP  
EVAMIEAVIEKY

>ApoIPBP1

MLRKISLLLLPVFVAINLVHSSPEIMKNLSNFGKAMDQCKDELSPDSVVADLYNFWKDDYVMTDRLAGCAI  
NCLATKLDVDPDGNLHHGNAKDFAMKHGADETMAQQLVDIIHGCEKSAPPNDKCMKTIDVAMCFKKEIH  
KLNWVPNMDLVIGEVLAEV

>ApoIPBP2

MSLSLFLAMLVTINLVQASPEIMKNLCMNYGKTMDQCKQELGPLDSVINDLYNFWKDDYVMTDRLAGCAINC  
LSTKLDIVDPDGNLHHGNAKEFAMKHGADDGMAQQLVDIIHRCEKSTPPNDKCTKTMDIAMCFKKEIHKLN  
WVPNMDLVVCEVLAVV

>ApoIPBP3

MIAKTFNLLVIVYLSTNTGVDASQEIMKTMTLTFTKGLDACKKEMDLPDTVDVDFNFWKEDYVVTNRDAGC  
AIVCLASKINLVDSMGILIHGSAHEFAKQHGADDNMAKQLSDTLHTCETIIGTGNDECTRALHVANCFKVEMHK  
LDWAPSMDLIIGELLAEI

>AsegGOBP1

MTHPGQALVLLVLLAAAALADVSMKDVTLGFGQALDKCRQESDLTEEKMEEFFHFWRDDFKFEHRELGCIIQ  
CMSRHFNLLTSSRMHHDNTEQFIQSFPNGEVRLQMVSLIHGCEKQFDHEEDHCWRILHVAECFKHACVAT  
GVAPSMEMMMTEFIMEAEAR

>AsegGOBP2

MTLKCCLLVVVAAVTRSAVGTAEVMSHVTAHFGKALEECRDESGLSAEVLEEFQHFWRDFEVVHRELGCII  
CMSNKFSLQDDSRMHVNMDHYVKGFPNGEVLSGKLVLEIHNCEKQYDTLTDDCDRVVVAACFKVDAKA  
AGIAPEVAMIEAVMEKY

>AsegPBP1

MSVRLALFMIAGVFITVECSQEIMKNLSLQFAKPLEDCKKEMELSETVITDFYNFWKEGYEFTNRQFGCAILCLS  
SKLELLDQDLKLHHGKAQEFKKGGADEAMAKQLVDMIHGCSQSTPDVADDPCMKTNLVAKCFVAKIHDLK  
WAPSMDLIMGEVLAEV

>AsegPBP2

SQKVVASFSGFKDVVDHCKAELNMGEHIMQDVYNFWREEYQLVNRDFGCMVLCTANKLGLLKEDQKMHH  
DKAEYAKKHGADDATAKQVVAIFECENNSGMDDECNRALIAKCFRTKMHELKWAPSVEDAIEEIMTAVM

>AsegPBP3

MGTYNVFFAFVLMAGVREIEPSKDAMKYITSGFVKVLEECKQELNMNDRIIADLFHYWKLDYTLNDRDTGCAI  
ICMSKLLDLLDDTGRMHGNAQEFALKHGAGEEVASKIVTIIHDCEKKFERDDDECLRVLEVAKCFRTGIHDL  
WQPRVEVIVSEVLTD

>AsegOBP2

MSKFTCLVLCLVAASISRVYADEDANKAAAFREAIKPIIDECSKEHGVSNDDIDAACKAGSADAIKPCFFGCIYKKA  
VFNAKGEYDVDNALSCLKKFFVPDEAKFAKYAEIGKKCASVNEKPVTDGEAGCERGAMLTACFLENRAEILI

>AsegOBP3

MIRSCRCLVFAAVFQVVLGQGLTGTDSGPPGFQRPOQSYVPKHCFAPPPVDLHSCCPIPQLFPDEDMESCGIQK  
LTKEQYDNPSPARVPCKESFCLLRNANLLKANNSIDYAKMEDFVDSWAKMDPDFTMPITNAKKVCLIEGGPP  
SPPVCEPDRVFTCLTSYVLWNCKLKLEKGEGCKILKEHMDGCRPFLAGP

>AsegOBP4

MCSCYSPCFMFGFQVCGILFFHHSPPSIFSLRSCIQPHINFALSHPLSPSLTSSSFTLAHSEPTASMNAIARSLVKW  
ASTNSLVLSTSNLPALSKNPDSFIKQLMKQGSIPSALCFSSASSNCSSVIPYSSAHFTTNG

>AsegOBP5

MKFLVICVALVAGIHANVTLPPEQSEKALKTASECIKETEVSSEVLAEAKKGNIPEDDGLKKFALCFFKAGIVDND  
GKLIETAVAKLPPGVDKVEAKKVLGECQSKSGKTPQETA FEIYKCYHAGAKTHIALAGI

>AsegOBP6

MFKYSVFVLFVVASTQADVLSQRENKGASLKPLSVCCDIPELGDPKHLAKCSNPKLPGPCNDVQCVFEESGFLTD  
KNTLNKEYRHHHLKQWEENKGWIAVDKAIKECVSDSPRQHLDFPCKAYDVFTCTGIAMLLKCPDPAWKC

>AsegOBP8

MYLRSASKGVHSPYGESTYTTKIVEFCSETGITREVPPEEKGVKFSERKGLREFNDCYLEKTGFVTCDDGLNIDE  
SLAKLPPGFAKPFVEHCQANIILKYIQDNVNDFSTCFHQEVQNHFLSYGFTNYWVMLVLGTSFEKTRFTTLFYD  
KNDFFWLAERAGFVEL

>AsegOBP9

MFHLYFYVFCIGVLSFNVKAASLDELKMKYVEMIIECSDTYPITAADTLQLKTKTMPDNESIRCLFACVYKAGM  
MNEQGELSVGVNEMTRRYLSDDDPKIKKSEQFTEACKSVNDVPVSDGTRGCDRAALIFKCTVEKSPDFDL

>AsegOBP13

MVLIDIVKFLILVAMCEAMTMKQIRNTGKMMRKSQPKNNVEDEKIDPIAEGIFIDEVEVKCYMACIMKMANT  
LKNGLNFDAAALKQADLLLPDEVKEPAKEAIIACKKAAEGHKDIDCVSFHVTKCIYNQNP GIFYFP

>HzeaPBP

MMSVKLALVAAWLFIRVDASQDVIKNSMNFAPLEDCCKEMDLPDSVTTDFYNFWKEGYEFTNRQTGCAI  
LCLSSKLELLDQELKLHHGKAQEFKAKKHGADDAMAKQLVDLIHGCAQSTPEVVDDPCMKTNLVAKCFKAKIHEL  
NWAPSMDLVVEVLAEV

>HzeaGOBP2

MTSKSCLLLVAMATLTASVMGTAEVMSHVTAHFGKALEECREESGLSAEVLEEFQHFWRDFEVVHRELGCII  
CMSNKFSLQDSDRMHHVNMHDYVKSFPNGHVLSEKLVLIHNCEKKYDTMTDDCDRVVKAACFKVDAKA  
AGIAPEVAMIEAVMEKY

>OnubPBP1

MGLSLRLLVVAAAIFGAESSQDVMKQMTINFGKALDTCRKELDLPDSINADFYNFVWKEGYELSNRQTGCAIM  
CLSSKLDLVDPEGLHGHNTHEFAKKGHADDMAKQLVELIHKCEGSVADDPDACMKVLDIKCFKAEIHKLN  
WAPSMDLVIAEVLAEV

>OnubPBP2

MWLSKTPVVIAMCSMSVVHSSQAVMKDMTKNFIKAYEVCAKEYNLPEAAGAELMNFVWKEGYVVSREA  
GCAILCLSSKLNLLDPEGLHRGNTVEFAKQHGSDDAMAHQLVDIVHACEKSVPPNEDNCLMALGISMCFKTEI  
HKLNWAPNHELMLEEMMAEMKQ

>OnubPBP3

MWLPKTLVVMAMSSMSVVHSSQTMREMTRNFIKAYEVCAKEYNLPEATGSELINFWKEGHETTREAG

CAILCMSTKLNLLDVQGSVHRGNTVEFAKHHGSDDAMAHQVVDILHACEKATPNEDKCMLALSIAMCFKAEI  
HKLDWAPNHELMFEELVSDMWNS

>OnubPBP4

MADATKWRVAAILVICFAVKLNTVMSSEEVMTKMGVTFNVL EECKKELKVTTNINEGLVRFWSQGAAPEREL  
GCVFLCMAHKKDLLEDQKRLHHENAHQFARGHGADDDKATEIVSLLRECEQQFITITDDCSR ALEV ARCFQAH  
MQRLQWAPSMEVMVEEILAGMA

>OnubPBP5

MKGFAGIPVTLMLVLIGVSEIEMVPEAMKQLTGGFLKVL DQCKKELNLS DGVISDLYHLWKEEYDQISR DAGCVI  
HCMSQKLELVGGDGKMHHVNIKDFALKHGAGDEIATQLVTLAHECEKQKASIEDDCERTLEMSKCFRSDVKQV  
DWTPKMEVIITEVIEV

>OfurPBP1

MGLSLRLLVVAAAIFGAESSQDVMKQMTINFGKALDTCR KELDLPDSINADFYNFWKEGYELSNRHTGCAIM  
CLSSKLDLVDPEGKLLHGNTHFAKKGADDSMAKQLVELIHKCEG SVADDPDACMKVLNIAKCFKAEIHKLN  
WAPSMDLIVAEVLAEV

>OfurPBP2

MWLSKTLVVIAMC SMSV VVHSSQAVMKDMTKNFIKAYE VCAKEYNLPEAAGAEVMNFWKEGYVLT SREAG  
CAILCLSSKLNLLDPEGTLHRGNTVEFAKQHGSDDAMAHQLVDIVHACEKSVPPNEDNCLMALGISMCFKTEIH  
KLNWAPDHELLLEEMMAEMKQ

>OfurPBP3

MWLPKTLVVMSSMSV VVHSSQTVMGEMTKNFIKAYE VCAKELNLSEATGLQLINFWKEGHELT TRETGC  
AILCMSTELNLLDVQGSVHRGNTVEFAKHHGSDDAMAHQVVDILHACEKATPNEDKCMLALS IAMCFKAEIH  
KLDWAPNNELMFEELVLDMWNS

>OfurPBP4

MADATKWRVAAILVICFTVNLNTVMSSEELMTKMGVTFN VL EECKKELKVTTNINEGLVRFWSQGAAPEREL  
GCVFLCMAHKKDLLEDQKRIHHENAHQFARGHGAEDDKATEIVSLLRECEQQFITITDDCLRALEV ARCFQAH  
MQRLQWAPSMEVMVEEILAGMA

>OfurPBP5

MKGFAGVPVTLMLVLIGVSEIEMVPEAMKQLTGGFLKVL DQCKKELNLS DGVISDLYHLWKEEYDQISR DAGCVI  
IHCMSQKLELLGGDGRMHVNIKDFALKHGAGDEIATQLVTLAHECEKQKAAIEDDCERTLEMSKCFRSDVKQ  
VDWTPKMEVIITEVIEV

>OfurGOBP2

MVCSGFYLGLVVM AAVTSVKGTAEVMSHVTAHFGKALEE CRTESGLSPEILEEFQHFWS EDFEVVHRELGCALI  
CMSNKL SLLQDDTRIHHVNMHDYVKGFNPGEVLSEK MVNLLHNCEKQFDDITDDCQRTVKVAACFKVDAKKE  
GIAPEVAMIEAVMERY

>PxyIABP

MKFLVVFAICLVAAQALTDEQKEK LKKHKTECLAETKPEVEHVDKLNKGDYTTENEALKKYAH CMMIKSELMTK  
DGKFRK DVALAKVPNPADKPMVEKLIDTCLANKGDTPQQTAWNYVKCYHEKDPKHAIFL

>PxyIPBP1

MWFPVRLSAVLLITLAVMDTQGSKETMKDITSGFFKVLNECKHELNLDPHLVGD FVHYWRQEYALLDRDLGCA  
ILCMSRKLELIDASGKLHGN TQFAEKHGADNSMASKLVEVLHSC EKQHEAVSDECQRALEVAKCFRSSVHEL  
GWAPTIDVIIIEVLTDM

>PxyIGOBP1

MERRWCLLVAAAAAGLPGVVRGTVEVMKDVT LGFGEALEQCREQSQLTEEMMEEFYHFWREDFKFEARAV  
GCAIHCMSRYFNLLGEQQRMHHDNTHKFIQSPNGEVL SHQMVGIIHTCEQQHDAETDHCWRILRVAECFKR

ESQAQGLAPSMEMLMMAEFIMEADV

>PxyIGOBP2

MASVWSLVVCGLMMAALPAARGTAEVMSHVTAHFGKTLLEECREESGLSGEIMEEFHHFWREDFEVHRELG  
CAIICMSNKFQLMQDDARMHHENMHDYIKSFPKGDLLSETMVRLIHNCEKKYDDIDDECSRVRVKTAAACFKKD  
AQAEGIAPELTMIEAVLEKY

>DindPBP1

MWVVKMILITVAVVMMMSVKVDLSQTLLKDMTKNFKAYEQCQQLSLPESTAKELMFFWKDGYEVSSREAGCT  
ILCLSKKMDLIDPEGKHLHGKSADFVKQHGTDDETANKVVDILHTCESNAAPNDDHCMVALAVALCFKKEIHNL  
NWAPDPEVILEELMAEMS

>MsepPBP

MVLHRSATMSAHLALVVIASFLIAVECSQEIMKNLSINFAKPLEDCRKEMDLPDSVLTDFNNFWKEGYEFTNRQ  
TGCAILCLSSKLELLDPEMKLHHGRAQEFAQKHGADEAMAKQLVDMLHSCMQTTPDDANDPCLKTLKVVTCF  
KTKIHELKWAPSMDLIVGEVLAEV

>EposPBP1

MMNHKELVLFVAVVCLSLYQAVEPSQDVVKDMSLNFVKGLDACKKELNLPDTINADFNRFWNDDHVVTNRDT  
GCAIMCLSSKLELVTDGLHHGNTLEYAKQHGADETVAAQIVDLLHTCAQAVPDLQDTCMKVLEWAKCFKAEI  
HKLNWAPSAEVMAAEMLAEV

>EposPBP2

MATVSKWRMLVLTCLTGWVQVESSADVMKKLTGFATALEKCRDELNLPDAVMQDFFNFWRDYELVNRD  
MGCAIMCMATKFDLVTEEQLHHGNAHEFAKSHGADDSMAKQLVTMLHECETQTASISDDCGRTLAIKCFR  
TKIHGLKWAPSMETILEEVMTEV

>EposGOBP1

MATVSKWRMLVLTCLTGWVQVESSADVMKKLTGFATALEKCRDELNLPDAVMQDFFNFWRDYELVNRD  
MGCAIMCMATKFDLVTEEQLHHGNAHEFAKSHGADDSMAKQLVTMLHECETQTASISDDCGRTLAIKCFR  
TKIHGLKWAPSMETILEEVMTEV

>EposGOBP2

MASYWAVCVVLVAGSHLVAGTAEVMSHVTAHFGKALEQCREESGLSTAVLEEFQHFWRDDFEVHRELGCAIL  
CMSNKFSLMQDDARMHHENMHDYVKSFPQGEVLSAKMVELIHNCEKPYDDIKDDCERVVKVAACFKVDAK  
KAGIAPEVAMIEAVMEKY

>CfumPBP

MLKQKELLFAXVCLSLTQMVEPSQDVIKGMCLNFGKGLEECKEMNLPDVTADFYNFWKDXYVLTNRDTG  
CAIMCLSNKLELVSDGKHLHGNTLDFAKQHGADETVAAQLVDLIHTCEKALPDLEDPCLVLEWAKCFKIEIHL  
NWAPTMDVLAGEMLAEI

>LdisPBP1

MSAKLLLVLAVCLVMRVDCSKEVMKQMTINFAPMEACKQELNVPDAVMQDFFNFWRDYELVNRD  
LCLAKKLELLDQDMNLHHGKAMEFAMKHGADEAMAKQLLDIKHSCEKVITIVADDPCQTMLNLAMCFKAEIH  
KLDWAPTLDVAVGELLADT

>LdisPBP2

MMWLRILAVAVCLVIPVEPSKDVMMHQMALKFGKPIKLCQQLGADDSVVKEFLDFWKDGYVMKDRQTGC  
MLICMAMKLELLDSAMEIHHGSTFAFAKAHGADEAMAQQIIDIVHGCTTTYPAETNDPCQRAVNVAMCFK  
AHVHKLNWAPDVELLVADFLAESQ

>CsupGOBP1

MEAAKVIMAGLLVGVVPSMRADMVVMKDITLGFGAALHCREESGLTQENMEEFFDFWRDFKFEHRELG  
CALRCMSRYFNLTDTNRMHHENTENFIKSFNGEKLSKVLVQVIHECEKKFDHEEDHCWRILHIGECFRDMCR



SQNIAPAMEMLLAEFIMQAESDTNPVAL

>CsupGOBP2

MVCSGFYLVVMAAVTSVKGTAEVMSHVTAHFGKALDECREESSLSTEVLLEEFKHFVSEDFEVVHRELGCALI  
CMSNKLSELLHDDTRVHQVNMHDYVKSFPNGEALSEMMVKLIKNCERQYDNIKDDCDRTVKVAACFKADAKK  
EGVAPEITMIEAVMEKY

>CsupPBP

MSLYMRIVLALVYLFNGVESSQEIMKQLSLNFGKAYDSCKKELELPNEVDTDFFNFWKDDYAVTNRLTGCAIM  
CMSNKLDLLDPDGKMHGHNAREFAKKHGADDSMAQQLIDILHNCEKGASPGPDGDACVQVLEISKCFKVEIH  
KLNWAPSMDLIMAEVLADV

>CsupPBP3

MKCCLFGLVCFNVMVSDVESSQELIKMSISFLKVLQECKLELSVPEEVLQSLMTFWNQDSDLHRELGCVILC  
VVKSLDLIELETYKLPDANANEYVKKHGADDETASQIMNLRGCEIKNEAITDHCDRVREIAKCFHGHMHKELKW  
APNMEVIIINELVATKAI

>CsupPBP1

MVRDTMMLKLVVVMCLTMTVVVDSSQTVMKSMTKNFKAYEVCAGEKEYSLKEGTAGILIGFWKDDFSTTSRDV  
GCAILCLSTKLDLIDPEGKLLHGGKATEFAMQHGSGEEMAKKLVEILHNCEQVTPNEDKCMRALDIAMCFKKEK  
HTLGWAPDPELLFEELIAEMR

>CsupOBP

MRCCAFLVFLAFIGCIYAEQEIHLPEKVAQILPVAMQCVGESSVPEVIFQYASGKSLGNDKKYQKFIHCVFTK  
TGYAETGHINIDKAMEVFPKGTDKAEVKKIMEECSKERGEDPPETSFKFAKCFRKKAPVRIAL

>CsupOBP1

MASFHFVNCFLYFVLLSSYFVYSMTRQQLKNSGKLLKACIPKTNVSEEQIRDIDKGGKFIGEKKIMCYIACIYMS  
QAIKNNKIQHDMVIKQVETMFPNDIKESAKFAIQCRGIAKQHKDICEAAFWTCKLYDADPATFIFP

>CsupOBP2

MGTVSTEHPAHVHINMKAFLVAVCIVAAQALTEQKEKLLKHKSECLAETKVDEQLVNLKAGDYKSDNEAL  
KKYALCMLIKSELMTKEGKFKKDVAKVANPADKPQVEKLIDTCSANKGNTPHQTAWNYVKCYHEKDPKHAIF  
L

>CsupOBP3a

MFLKLLMLTVLFCAIHAMTRQQLKNSGKMLKKNKCMGKNQVTEQIGSIEKGFIEDKNVMCYIACIYQMTQVI  
KNNKLNYEASLKQVDIMYPAELKESAKSIENCKHISKYKDICEASYWTAKCMYEDNPKDFVFA

>CsupOBP11

MGFSRAVLLAAFVAGAWAMDEEMAELAKMLHDNCGEETGADLSLVKVNAGADLMPDPKLCYLCIMET  
AGMMTEGVVDVEAVLALLPDDMRKNEQNLRGCGTQKGADHCDTAFLTQLCWQKANKADYFLI

>CsupOBP5a

MLLIIIAKFLVLVAICEAMTMKQIKNTGKMLRKTQPKNNAADEKIDPLNEGVFIDEKEVKCYIACIMKMANTM  
KNGRPNIEVAMKQADLLLPEELKEPAKEALTACRKVPDAHKDVCDAAFHLTQCVYNQNPDIYFYP

>CsupOBP6

MAKFVVLCLGLLAAALSVAKLTKEELDHKEATLMHFNECNKDFNVSEDDIKAAETQKNMDKIDACLIGCMMK  
RSHLLDGEGKFDTEKAIELSKSFMKSEDDQKKFAEVVAECAKVNDPEVSDGANGCERSKMVLVCLAKHKAIEV  
PARR

>CsupOBP5

MKLTLPAPALLFTSILGLKDEHEENLKRWHMECFQETKVNPDVLVLLKMGNWQIKNKLKEWILCVFNKYDLM  
SKEGVFKLDTAMSLVPSADRMIEDYIDACLPHIAEPLDIKAWKYAKCYHVGAKDPINKNKRHLHYMTLFY

>CsupOBP7

MTSGSEQDIIKTPEETDTNPDLMAIMGECNETFRIETSYLESLSNESGSPDES DKTPKCYIRCVLMKTGVTTEDG  
KFIPDVTSQVFASQNIKEQMDGIQNMATACAVDRNESCKCDRSYMFMKCLMESEIKSFMKIM  
>CsupOBP8  
MGFSRAVLLAAFVAGAWAMDEEMAELAKMLHDNCGEETGADLSLVDKVNAGADLMPDPKLCYLK CIMET  
AGMMTEGVVDVEAVLALLPDDMRADHCDTAFALTQLCWQKANKADYFLI  
>CsupOBP9  
MNCSVIAIIFAFSLTSAEELSDEIKEIQHVHNECVAKTGVAEEDIKNCENGIFKEDEKLKCYMFCLMEEANLAD  
DDGVVDYEMMVSIIEPEQYTDRTVMIFACRHLDTPEKSKCQRAFDVHKCSYSKDP EYFLF  
>CsupOBP4  
MFRLFLCLVVFVTTSYGDLTQERSGATLKPISACCGIPELGD SKPLTECSKPKLLGPCNDIQCVFEKSGFLVDRNT  
LNKD VYKHLRQWAEAHDSWTEAVERAIADCVDKELRQYLDYPCRAYDVFTCTGIAMLKKCPQEA WKC  
>LstiPBP  
MGFSVRLLVVAVTIYGVNSSQDIKQMTINFGKALDSCRKELDLPDSINADFYNFWKEGYELSNRQTGCAIMC  
LSSKLDLVDPEGKLLHGHNTHEFAKKGHADDAMAKQLVDLIHKESDVPDDPDPCLKVLNIAKCFKAEIHKLNW  
APSMDLIMAEVLAEV  
>LstiGOBP2  
MSSAWILLGLVMAAVSSVRGTAEVMSHVTAHFGKALEECRTESGLSPEILEEFQHFWS EDFEVVHRELGCAIIC  
MSNKFSLLQDDTRIHHVNMHDYVKSFPNGEVLSEKMSVLLHNCETQYNDMTDDCDRTVKVAACFKADAKKE  
GIAPEVAMIEAVMEKY  
>AtraPBP1  
MKMHLFVQVIAASVMLMAGVDSSPEIMKDL SINFGKALDTCCKELDLPDSINEDFYKFWKEDYEITNRLTGCAI  
KCLSEKLEMVDADGKLHGHGNAREFAMKHGADDAMAKQLVDLIHGCEKSIPPND DRCMEVLSIAMCFKKEIHN  
LKWAPNMEVVVGEVLAEV  
>DpleGOBP1  
MKDVTLGFG EALKCREESQLTEEKMEEFFHFWRDDFKFDDRAVGC AIKCMSSHFDLLTDSHRMHHRNMDN  
FIKSPNGEVLSQQMVTLIHECEQQHDSEEDHCWRILRVAECFKSSCKKHGIAPT MELLMAEFVMESEAN  
>DpleOBP1  
MTRQQIKNSSKMLKKNKCMGKNDVTE DMVGEIDKGFIEDKNVMCYIACIYQMSQLVKNNKLN YEASIKQVDL  
MFPPDMKEAMKASIENCKDISK KYKDICEASYWTAKCIYDDNPKNFIFA  
>DpleOBP  
MYILAVVKFLAALTICEAMTMKQIKSTGKMMRKT CQPKNNVADDKIDDIGTG VFIEREVMCYVACIMKMAN  
AIKNNKLN YEAAIKQADLLL PDEIKEPTKEAITACRKVADSYKDICEASFHVTKCIYNHNPSIFFFP  
>DpleGOBP1a  
MKKLTTFVKAMEECKAELNLGDHIIQDFMNYWRE EYELLNRDTGCAIMCMASKHDLITEDMKIHHENAHEF  
AKSHGADDDLAKQLVQMIHDCEKQFTDITDDCSK TLEISKCFRTKIHELKWAPSMETILEELMTET  
>DpleOBP4  
MKKWFL ELTVECSKEHPVTKEEQMLKDHKIPDNKNVKCLMGCVFRKIGW LDDNGMFSFN NAYKTSEEEYPD  
DKTKLEKAKNLYSLCEKVNTAEVSDGKEGCERS SLLAKCLIENSSKMGFVVQ  
>DpleOBP2  
MAVRGLLLLSAVLAATSVTVDGTAEVMSHVTAHYGKSLEECRKETGLSKEILEEFKHFWSDDFEIVHRSPTVRL  
HPHLHDDARMHHINMNDYVKGFP EGDVLADKLVQMIHKCEKEYDDIKDDCDRVVKVAACFRADAKKEGIAP  
EVAMIEAVMEQY  
>DpleOBP1a  
MTAEQKQMVHQHF EQVGMCEIKTHEITAEDVTNLRTRKIPTGENASCFLSCIFKHV GIMDDNGLLQKESAIELA

KKVFDDEEELKLIEDYLHSCSSVNTATVSDGEGKGCERSLLAYKCMIENASQFGIDL

>DpleOBP4a

MRIMCVVFLVSGYVYGLTDEEVKKEFIKEMTCTKDITVDMFDLMELEQLKVPTKTNVKCVLACAYKRVGTM  
NKEGKYDIKEAYKISSETMMKGGDKRIENGGKLDLCSKVNEADVRDGNKGCERAALLFKCVIENAPKLGFKV

>DpleOBP5

MECSKDYPLTDEDIAQLKDKQFPDKDDVRCLFACAYKKTGMMDDQGKLSVDGVNNLAKKYFSDQDKLQKS  
QKFTEACAGVNDEAVTDGEGKGCERAALIYKCSIEQASQITIGYQTCCKILAKRPRIGVLAQAQEQDRLNRDLFLHL  
GNTMQQ

>DpleOBP6

MLNLLRIALFIVAVNADLLNHRTKGTATLKPISVCCDIPELGDPKPLAECNSMKLQGPCSDVQCVFEKSGFLDKQ  
TLNKEGYRNHLMKWLEGHKEWKDIEKAISDCVDVLDLRQYLDYPCAYDVFTCTGIAMLKKCPKDSWKC

>SinfPBP1

MADSRWWLASFICVMIMTSSVMSSKELVSKMSSGFSKGLDQCKAELNVGEHIMQDMYNFWREEYELVNRD  
LGCMVMCMASKLDLVGEDQKMHHGKAEEFAKSHGADDELAQKLVGIVHACETQHQAIDDDPCSRTEVAKCF  
RSKMHELKWAPTMEVAIEEIMTAV

>SinfPBP2

MALHRSPTMSARSVLVLIASLFFVIVKCSQEVMMKNLTHNFSKPLEDCKKEMDLPDSVFTDFLNFVKEGYEFTSRH  
TGCAIVCLSSKLELLDPLKLLHHGKAQEFQAQKHGADEAMAKQLVGLIHGCMEDIAIREPADDPCMRALNVAKCFK  
AKIHELNWAPSLDLIVGEVLAEV

>SinfPBP3

MRSNNIIFSVLLMSVGVREIEPSKDAMKYITSGFVKVLEECKELNMNDHIIADLFHYWKLDYTLNLRDTGCAIIC  
MSKKLDLLDVNGRMHHGNAREFALKHGAGDEVAGKIVDIIHDCEKKFERDDDECLRVLEVAKCFRTGIHELDW  
QPKVEVIMSEVFTEI

>DtabPBP1

MTKTYTFLAVAVILLAIASRVDSQDVMKDLVSKFGESMNQCIKEMDLPDVSADFYNYWKEDFVITRRETGCLF  
SCLAKKVSQMHSDDLHKDNTNHFATKHGADDEMAAKLVETIHACENSISESDDCVRVLSIANCFKEMHKLN  
WAPSAELVTQELMTIL

>DtabGOBP2

MLVYLVPLVIGLVMPEVVGTAEVMSHVTAHFGKALQECRDESGLSPEILEEFQHFWSDFEVVHRELGCAIICM  
SNKFSLLQEDTRMHHVNMHDYVKSFPNGQVLSEKLVQLIHNCEKQYDSITDDCERVVKAACFKVDAKKEGIA  
PEVAMIEAVMEKY

>DtabGOBP1

MRWTQLALLALCCLMQARGDQTVMKDVTLGFGQALEKCREESGLTDEKMEEFFHFWHDDFKFVHRELGCAI  
LCMSRHFNLLTETSRMHENTDNFIKSPNGEILAAKMEIHTCELRFENEADHRCARILRIAECFRDTCVSDLA  
PTMEILIAEFILQAESGKR

>GmolPBP3

MARFSILFSLVIIAVTVKEIELSSDAMKAITSGFLKVLQCKQELNLQGHVISDLYHYWKEDYSLNLRDTGCAIICM  
SKKLDLIDASGLLHHGNTAEFAAKHGAASEVASKLVEILHACEKTHDAIEDDCMRALIAKCFRTDINQLNWP  
MDVIIIEVLTEM

>GmolPBP2

MAASGRWRMLLAVFVLSVCVNRVTPSADIMKLLTTGFATALDKCKNELNVQENVMQDCYNFWREDYELLNR  
DTGCVILCMALKFDLIDEDAKLHHKNAHEFAKTHGADDDLAKQLVAMIHDCEKQNSDADDCIRTLGIAKCFRTK  
IHGLKWAPSMETVLEEVMTVEVKPS

>GmolGOBP1

MSKNLVRLLALTAVAVAQATQEVLDVTLGFGEALEHCRESTGLTTEKMEEFFHFWSDDFKFELREVGCAIQC  
MSKYFNLLTDGERMHENTDKFIKSPNGEVLAKQMVTLIHTCEQQFDDMEDHCWRILRIAGCFKTGCQERG  
IAPSMELIMAEFIMEADA

>GmolGOBP2

MALYWMVTVLLVVGGRMVDGTAEVMSLVTAHFGKALEQCREESQLSPEVLDEFHNFWRDEFVHRELGCA  
IICMSNKFSLQDDARMHHDNMHDYILSFPKGDVLSAKMVELIHNCEKQYDDISDDCSRVRVVAACFKVGATQ  
AGIAPEVAMIEAVLEKY

>CpomPBP2

MAAAAKWRTLVAAFILTCVNRVTPSAEIMKKLTTGFATALDKCKTELNVQENVMQDFYNFWREDYELNDRD  
GCVIICMALKFDLIDEDAKLHHKNAHEFAKTHGADDDLAKQLVGMIIHECEKATTEADDCIRTLIAKCFRTKIHG  
LKWAPSMETVLEEVMTVEVKPS

>CpomGOBP2

MALYWLVLGLVVGGMVDGTAEVMSHVTAHFGKALEQCREESQLSPEVLDEFHNFWRDEFVHRELGCAI  
MCMSNKFSLQDDARMHHDNMHDYVKSFPQGDVLSAKMVELIHNCEKQYDDIPDDCSRVRVVAACFKVDA  
KKAGIAPEVAMIEAVLEKY

>CpomGOBP1

MSHIARLVLSLAVALAHATVEVMKDVTLGFGALEHCRESSGLTEEKMEEFFHFWHDDFKFEHRELGCAIQC  
MSRHFNLLTDGQRMHENTDKFIKSPNGEVLKTMVTLIHSCEQKFDDMEDHCWRILRIAECFKSGCQERGL  
APSMEMMMAEFIMESEV

>HevirPBP

MVFHRSTMMSVRLVLVAVGLLIRVDASQDVIKNLSMNFAPLEDCKKEMDLPDSVTTDFYNFWKEGYEFTN  
RQTGCAILCLSSKLELLDQELKLHHGRAQEFAKKHGADDAMAKQLVDLIHGCAQSTPDVADDCMKTNLVAKC  
FKAKIHELWAPSMELVVGEVLAEV

>HevirGOBP1

MRGELRALLLLAAAAPLLADVNVMKDVTLGFGQALDKCREESQLTEEKMEEFFHFWRDDFKFEHRELGCAIQC  
MSRHFNLLTDSSRMHHDNTEKFIQSFPNGEVLARQMVELIHSCEKQFDHEDDHCWRILHVAACFKGACVQRG  
IAPSMELMMTEFIMEAEAR

>HevirGOBP2

MTSKSCLLLVAMATLTTVMGTAEVMSHVTAHFGKALEECREESGLSAEVLEEFQHFWRDEFVHRELGCAII  
CMSNKFSLQDDSRMHHDNMHDYVKSFPNGHVLSEKLVLIHNCEKQYDTMTDDCDRVVVAACFKVDAKA  
AGIAPEVAMIEAVMEKY

>CmedOBP1

MDGKNLPSGVFLIILVILLSSDFSGMTRQQLKNSGKIMKKSCMPKNDVTEDQIGEIEQGKFIERNVMCYVAC  
VYTMTQVVKNKLSYEAVVKQVDMMFPEMRDAVAAAAHCKDVAKKHKDLCEASYWTAKCMYDFDPKN  
FVFP

>CmedOBP2

MLLVILAKFLMVLAMCNAMTMKQIKNTGKMMRKSCQPKNNVADEKIDPLGDGVFIDEKEVKCYMACIMKM  
ANTMKNKPNYEAQVQVLLPEEIKQPAKEALAACKKVPDAHKDPDAAAFHVTKCIYNHNPSIFFFP

>CmedPBP1

MGFLVKLVLLAMVVGQSSQDVMKKVTVHFSKALETCKKELDLPDAINTDFFNFWKEDYELQNRLTGCALMC  
MSSKLDLVDPEGKLHHGNAHEYAKSHGADDSVAKQLVDLLHGCSSTAQSDDDCSRVLGIAKCFKAEIHKLKW  
APDME

>CmedPBP2

MWAKTLMVVVTVVMMSVNVESSQTLTKDMTKNFKAYGQCQKELGLPDSTATELMNFWKEGYEIKSREAGC

AIMCLSKKLEVIDPEGKHLHGKTTTEFIVAHTDEATAHKLIDILHACMQSVTPSEDHCLMSLQVAMCFKAEIHKL  
GWAPDTELLFEEMVAEMQ

>CmedPBP4

MEVEMLPEGMKQLTGGFIKVFACKTELGLKDGMLTDMYHLWREEYDQVSPDAGCMFGCMSKKLDDLDAS  
GKIHHGNTKEYVMQNGGGEDLAAQLLSISQECEKQHEGVEAECARMLEMAKCFRSGIKRVQWSPKMEVVIT  
EIIADV

>CmedGOBP2

MLSSWVLLGLMMAAVASVKGTAEVMSHVTAHFGKALEECREESGLSPEILEEFKHFVNEDFEVVHRELGCALI  
CMSNKFSLQEDTRIHVNMHDYVKSFPNGEVLSDKMVELLHNCEKQYDAITDDCDRTVKVAACFKKDCQKE  
GIAPEITMIEAVIERY

>CmedGOBP1

MRLEAALLCALAAAALVEGSHKIMSDVTLGFGQALEHCREESGLTEDKMEEFFHIWSKDFKFQDRELGCALRC  
MSKHFNLT DANELH HENTENFIKSFNGEQLAKELVLIHNCEKQFEGVEEHCMRTL RVGECIRDACLSDLAP  
TMELLAEFIMQTEA

>DpunPBP1

MTKTYTFLAVAIVLLAIDSRVDSSQDVMKDLVSKFGESMNQCIKEMDLPDVSADFYNYWKEDFVITRRETGCLF  
SCLAKKVMQHSDDLHKDNTNHFATKHGADDEMAAKLVETIHACENSISESDDCVRVLSIANCFKKEMHKLN  
WAPSAELVTQELMAIL

>DpunGOBP2

MLVYLVPLVIGLVMPEVVGTAEVMSHVTAHFGKALQECRDEESGLSPEILEEFQHFVSED FEVVHRELGCAIICM  
SNKFSLLQEDTRMHVNMHDYVKSFPNGQVLSEKLVQLIHNCEKQYDSITDDCERVVKVAACFKVDAKKEGIA  
PEVAMIEAVMEKY

>DpunGOBP1

MRWTQLTLLALCCLMQARGDQTMKDVT LGFGQALEKCREESGLTDEKMEEFFHFWHEDFKFVHRELGCAIL  
CMSRHFNLLTETSRMH HENTDNFIKSFNGEILAAKMVEIHTCELRFENEADHCARILRIAECFRDTCKSVDLAP  
TMEILMAEFILQAESGKR

>DsupPBP1

MTKTYTFLAVAIVLLAIDSRVDSSQDVMKDLVSKFGQSMNECIKEMDLPDVSDFYNYWKEDFVITRRETGCLF  
SCLAKKQSMHSDGELHKDNTNHFATIHGADDEMAAKLVETIHTCENSISESDDCVRVLGIANCFKKEMHKLN  
WAPSAELVTQELMAIL

>DsupGOBP2

MLVFLVPLVIGLVMPEVVGTAEVMSHVTAHFGKALQECRDEESGLSPEILEEFQHFVSED FEVVHRELGCAIICM  
SNKFSLLQEDTRMHVNMHDYVKSFPNGQVLSEKLVQLIHNCEKQYDSITDDCERVVKVAACFKVDAKKEGIA  
PEVTMIEAVMEKY

>DsupGOBP1

MRWTHLTLALCCLMQARGDQTMKDVT LGFGQALEKCREESGLTDEKMEEFFHFWHDDFKFVHRELGCAIL  
CMSRHFNLLTDTSRMH HENTDNFIRSFNGEILAKKMVEIHTCELRFEDPHCARILRIAECFRDTCKSADLAP  
TMEILMAEFILQAESGKR

>DhouPBP2

MAVLTKWRMFVVIYLNLNQSSQDIKSMTSSFGKLVTECQTELELGDEIIQEFVNYWSEDYQLVNRDIGCM  
ILCMASRLDLVNFTDMLHGHNAHEFAKSHGADDATAGQIVIIHDCEKANIDEGDLCTRIMKVAKCFKVN MH  
DLKWAPSIEVILEEVMISV

>DkikPBP2

MAVLTKWRMFVVLVFLNLNQSSQDIKSMASFFGKLVTECQTELELGNEIIQEFVSYWREDYQLVNRDMGC

MILCMASRMDLIEFGDMTLHHGNAHEFAKSHGADDATAGQIVTIIHDCEKANMDEGDLCTRVMKVAKCFKV  
KMHDLKWAPSIEVILEEVMISV

>DhouOBP17

MKTFILIAVCLVAVQALTDEQKEKLLKHKTECLAETKPDEQLVAKLNGDYKTESEPLKKYALCMMVKSELMTKD  
GKFKKDALAKVPDAADKPMVEKHIDACLANKGSTPQETAWRVVKCYEKDPKHAIFL

>DhouOBP10

MFRPLFIYFTFIYFLFCDVQAQSNLDELQKNYLNFILECAVENPVTSDDEELKNQKMPDKENVKCLFACAYKKA  
GMMNDKGDLEFIEGVQEINKKYFGDNPEKMNKSEQFIQACKSVNDSPVSDGNKGCRAALIFQCSVEKAPDFE  
LVV

>DhouOBP13

MGAYLFMCLMLTAVGLEAHTIHLTHTQKDKAHLTMECMKESNVKPEVITEAKKGHYADDEKLLKFTLCFFQK  
AGILTPDAKLNVDTALEKLPVGDVKAETKVLEECKNKTGDKADTAFEIFKCYHHGKTKHILF

>DhouOBP6

MSRTSVVIFWTLYLMGLFCPNNAAVTAEQKSKIHEKLEGILLCVKDNAITEDDITSLRARKVPGGPNAPCFAC  
MMKEIGVMDSGKIQKESALEIAKTIFEDSEDLKNIEDYLHSCAHINTEEVSDGDKGCDRAMLAYKCMTENS  
SSKFGFDNV

>DhouOBP11

MVRSASLIVVALAVLSKYSLALSDEKKTQVYGLLFAKAVECGKEFPISDDEVLALKNKKIETDNAKCFAACTLKKAG  
ALDEAGKLSAGAVKAIQDTLTDPAIDKNLEDFFAHCSSVNDEAVNDDKGCRAKLIFFCFRDNADAYGFNLDF

>DhouOBP4

MLGIRVGHIALFVLAQYCFDDEVLELAKMVRESCAETNVDISLVEKINTGAGLTPDPVLKCYIKCTMETAGMMS  
DGVMDLEVVMTLMPDDLKNKHGAGLEACGTQKGADDCDTAYLTQVCWQKTCKSDYFLI

>DhouOBP9

MFSITLSTAFLYLIAIIQAGKEKPIFSDEIKEIIQIVHDECVEKTGVTEEDITNCENGIFKEDVKLKYMFCLLEEASLV  
DDEGVVDYDMLISLIPDAYHDRASHMLLSCKHLDTDPDKCERAFDVHKCSYEKDPDLYFLF

>DhouOBP3

MYFQVILCFMVGACYARTDTEIRAWFFRQGVESKDHPVTEEMKLMHQHQFPESRNSKIGACVFRAN  
WLDKSGMFDLEQGIASFSEKEYADNPTKLEAGKLFQFCTKVNEEPVTDGEDGCDRALLSKCLIGNAKEYGFVEI  
PTDGPEE

>DhouOBP1

MLFKVIIHLFVYWFCEAMTMKQMKNSGKMMRKTQPKNNVEDEKLDGIMKGEFLDDTNLKYMACIMKM  
ANAVKNGKINYEQSLKQADLLLPEEIKEEAKAAITCKNAANGHKDICDASFHMTKCVYEANPSIFYFP

>DhouOBP16

MKIQIVVLFVLSILVVVRAERTPYHLPEKETENLLQVGSQCLTETNVPTETWDAIKDKYEHDDIYKFLFCMMTKL  
EFVDDQGHPIKNKLYGTFKEDDLKVIDKCGADPKGDTVPDVTYSFYKCCIDNTNIRIAI

>DhouOBP7

MNLDLLVTVLMSFNMLCVWSVTRQQLKNSGKLLKACMPKHDVTEEQVGNIDKGTFIEDRNVMCYIACIYS  
VGQAVKNDKIIHDAMIKQVNQMFPKMKDAVKAAIENCRGVGKSTIRNKLTVFVWRLCHI

>DhouOBP2

MSIKYVCVALLAFTAYAIALTQEDKQAFILTSIAPLIGESKEYGVNPEEIEAAKAAHSGESLKPCFVACFFKLGVIN  
DNGDFDPEASKAKGKQFFKDVEDQNKVSEIADICTSINAETVSDKTQGCDRSKLLMECYSKNKGGFSPFV

>DhouOBP14

MQIHSSVSFVVCAILFNGQTNCARTVAKAPPELAGPILETISACGEETKNNPERIMAAMKDNKVFEDDAFLKFI  
DCTFQKSGYAKPDGTLDIEKSVKIFPKNVDMKTVFENCNKDKGSTRVETTFKIYKCYQQTSPVQLVF

>DkikOBP14

MCLGTLVANTFGITQEDIRKFREVMRPIVSSCANQYGITLQVIEARKAGTMEQLDPCLECVFKKTGVINDKGL  
YDPDTAIEKSKKYVTPADVEKFNNIHKACIPVNDAPVGDSDKDCERAKLLSCLVKHKGEFSTLAL

>DkikOBP7

MFRPVFIYFTFIYFLCDVQAQMNLDLQKAYLNYVLECAVENSVPDDLEELKNLKMPPDKENVRCLFACAYKK  
AGMMNDKGELFIEGVQEITKKYFSDNPEKMKYSEQFIQACESVNDAPVSDSKKGCRAALIFKCGVENVPDFE  
FIV

>DkikOBP20

MKAFILIAVCLVAVQALTDEQKEKLLKHKTECLAETKPDEQLVAKLNGDYKTESEPLKKYALCMMVKSELMTKD  
GKFKKDALAKVPDAADKPMVEKHIDACLAANKGSTPQETAWRYVKCYEKDPKHAIFL

>DkikOBP6

MCSAELCVLRDLFADKLEYDNDFNVLVPAIRECTSEMGYTEDDLDTARKNQQLDDCMFICVFHKMGLMKDD  
KMDLDETYALTEKFFKPDTKEDIRKVSVDICYKVSADKSENDKCCDRARLIFDCLKNIM

>DkikOBP13

MFSITLSTAFLYLIAIIQAGNEKPIFSDEIKEIIQIVHDECVEKTGVTEEDITNCENGIFKEDVKLKYMFCLLEEASLV  
DDEGVVDYDMLISLVPDAYHDRASHMLLSCKHLDTDPDKKCQRAFDVHKCSYEKDPDLYFLF

>DkikOBP13a

MKNLIFIITFALITFSLTNPIRAEDDKNKQTDQASKAIKEIDLNEVMAECNKSFTIQMSYVDALNKTGSFPDES  
DKT  
PKCYVRCMLEKTGIMSSDGVFDLKRIPVVFANQHDGDFLVKDEVIASLCAERKEKQCEKAYNFMKCFRTTEIN  
YYEKETQ

>DkikOBP11

MNLDSLVTVLMFSNMLCVWSVTRQQLKNSGKLLKACMPKHDVTEEQVGNIDKGTFIEDRNVMCYIACIYS  
VGQAVIKNDKIIHDAMIKQVNQMFPANMKDPVKAAIENCRGVAKNYKDICEASYWTAKCMYDYDPSNFVFA

>DkikOBP15

MTRAQVKNTMTMMKKQCLPKTGATEDKVARIEEGVFIEHVSVMCYIACVYKAIQVVNDRDLDMGLVSKQIDL  
LYPQNMKEPAKKAAGQCVSIQDKYSDMCEAIFYATKCYEADPSSFIFP

>DkikOBP19

MKLQIVVLFVSVLVVISAERTPYHLPPKETENLLQVGAQCLTETNVPTEWDAIKDKYEHNEYKFLFCMMSK  
LEFVDNQGHPIKNKLYETFKEDDLKKVIDECGADPKGDTVPDVTYGFYKCCIDHTNIRIAI

>DkikOBP3

MLSZYKPIFIVFSHFVVPAPNMYDKRIQICIQALSLLLLVGDYAMTKQQLKSGKMMKSCMPKNDVTEDEV  
GEIENGKFIEEKNVMCYIACIYTMGGVVKNNKIALDLMLKQIDTMFPAEVKDELKAAANSCKDTLKKYKDICES  
YFMAKCLYDTAPDAFLFP

>DkikOBP18

MLHCKTTVLVVFVSTVYADMKRPFQFPKERIDNFMNTASTCNKELNTNIDVSELFKGYDQSESFKDSFYCIAV  
NSGFYDANGWPKLEKLYEIKDEDVRTVLKDCTADLDGERPKDLASNYLICFLVKAPITVIF

>DkikOBP16

MQIHSSVSFVVCAILFTGQTNCAVVKAPPELAGPILETISACSRETKNNPERITSAMKENKVFEDDAFLKID  
CTFQKSGYAKPDGTLIDIEKSVKVPKNVDMKTVFENCNKDKGSTRVETTFKIYKCYQQTSPVQLVF

>DkikOBP5

MCRSAVIFCTLYLIGLFGSNHAAVTAEQKSKIHEKLEGILLCVKDNAITEDDITSLRARKVPSGPNAPCFLACM  
MKEIGVMDSGKIQKESALEIAKTIFEDSEDLKNVEDYLHSCAHINTEEVSDGDKGCDRAMLAYKCMTESSKF  
GFDSV

>DkikOBP22

MYGVVAIFTFLAVAWGDTSPDPSRVYCGFTPDSIYACLHNPKVIKQDVSVKCDKSTSECDRMNCIFRESGWLDG  
SNVDKQKVSAYFDQFAKDQPEWSTAVQHLLKTDCLNKDLPAQGVILNCPAYDIVHCALTAFIKNASPSQWSTAEQ  
CAYSRSYASACPVCPSSECFAPQVPIGSCNACY

LPPRTPQS

>DkikOBP23

MVGQSICLLVAVILQVISAETPLNVLNPLHRECYRPPHNVERPHECCKLTSFYKEEDFKCEGLDKIEEGEKSGYRH  
GPPDCTKSNCLLAKNDMLKDDKPDLEKIKAYITNWADKNPAFKDAVDDAITKCIKEDLPGPPHACLASKLAGCLT  
FRLFLKCPAENWESSANCDVKEHIEKCK

SLFENPPQ

>DhouGOBP2

MLVFLVPLVIGLVMPEVVGTAEVMSHVTAHFGKALQECREESGLSPEILEEFQHFWSDFEVVHRELGCAIICMS  
NKFSLLQEDTRMHVNMHDYVKSFPNGQVLSEKLVQLIHNCEKQYDSITDDCERVVKVAACFKVDAKKEGIAP  
EVAMIEAVMEKY

>DhouGOBP1

MRWTHLTLALCCLMHARGDQTMKDVTLGFGQALEKCREESGLTEEKMEEFFHFWHDDFKFVHRELGCAIL  
CMSNHFNLLTETSRMHHTNDKFIKSFNGEILAKQMVEMIHTCELRFESPDHRCARILLVAECFRDTCSTNLA  
PTMEILMAEFILQAEAGKR

>DhouPBP1

MAKAYTFLAVAIVFLAIDSRVDSSQDVMKELSVRFGESMNLKIKEMDLPDVSADFFNYWKEDYVITRRETGCLF  
SCLAKKVHMQHPDGLVHKDNTHNFATKHGADDEMAAQVLEVIHSCENSISESDDCIRVLGIANCFKEMHKL  
NWAPSAELVTQELMAIL

>SfruOBP

MSKFACLVLCVAVSLSGVHATAEKAFAIEAVKPHIQECSKEHGVTPPEIKSAKAAGNADGINSCLFSCVYKKA  
VINDKGEYDADKALEKLLKFVSNEDDYAKFAEIGKKCASVNEKSVSDGDAGCERAALLTCFLEHKSEIPA

>PaegOBP

MVGFVALISLSLLAVCNADIGVDPVVKCGSMPPSVYSLGTPRVVNPKLAAQCDKTLPECEKLTICFRKSGWMD  
GDKVDKVKLTAYFDQFATDNPDWQPAVDNLKTTCLQGDLPAGVLLNCPAYDAMQCTFASFLKHAQPSQWS  
TSESCNAARQYAASCPVCPTDCFASQIPVGSNCACLVLPRSP

>SnonGOBP1

MQEVVRLVLLSVAGALADVNMKDVTLGFGQALDKCRQESDLTEEKMEEFFHFWREDFKFEHRELGCAIQC  
MSRHFNLLTSSRMHHTNTEQFIQSFPNGEVLAQQMVLMIHSCEKQFDHEEDHCWRILHVAECFKQECVSKG  
VAPSMEMMMTEFIMEAEAR

>SnonGOBP2

MTTKCSLLLVIAAVTSSVMGTAEVMSHVTAHFGKALEECREESGLSAEVLEEFQHFWRDFEVVHRELGCAIIC  
MSNKFSLLQDDSRMHVNMHDYVKGFPNGELLSQKLVDLIHNCEKQYDSIPDDCDRVVKVAACFKVDAKAA  
GIAPEVAMIEAVMEKY

>SnonOBP1

MMKNSVCLYFAVMAVNFVNVKCMSDEEKAVLETLPIVEGCASDYGLTNEDFKKHENIDDDNFLPFKCLL  
QKLEIMDETGYNSDAISKIVDYTDGKEQAKKFKEQFDSCFRKNGNNDGDDEASQMKRVFVMFKCFKEMEE

>SnonOBP2

MLLIKVFVFLILVAMCEAMTKQIKNTGKMMRKTCPKNNVEDDKIDPIAKGIFIDEKEVKCYMACIMKMAN  
TIKNGNFNFEAALKQADLLLPEVKEPAKEAIIACKKAADGHKIDICDVSFHITKCIYNQNPQIFYFP

>SnonOBP3

MKSFTVFCVVLVAGIHAANVTLPNNQKDKARQIGAECIKETGVTEILAEAKKPIPEDESLKKFTYCFKAGIID



NDGKLNIDVALAKLPPGVDKDDAKKVLLEDCKSKTGKEPQDTAFEIFKCYHAGTKTHILLTDA

>SnonOBP4

MKCLLVFAACILLAQALTDEQKEKLLKHRTECLTETKVVEQLVNKLKGGDYKTDNEALKKYALCMMVKSELMTK  
DGKFKKDVVALAKVPNAADKPTVEKLIDACLANKGNTPQQTAWNYVKCYHEKDPKHAIFL

>SnonOBP5

MLKFTCLALCVVAASISRVYAGEEEKAAFREAIKPIIECSKEHGVSTDEIHSAKTAGNAEGIKPCFLGCVYNKAAVI  
NDKGEYDVRTALLKLLKFPDDEEKYAKLAEVAKKCASVNDKPVTDGEAGCERAALLTACFLENKAEAFI

>SnonOBP6

MSKFTCIVLCVVAASLTKVSHAVTEEEKAAFHEVMEPIVDECAKEHGVSEAEIKAAHEAGSADSIKPCXLAMYHE  
KTEMLDSKGLFDAEKSLKLLKYVKNDEEFAKYEEIGKSCMSVNEKAVSDGEAGCERAKLIIDCFLVXHKADVPF

>SnonOBP7

MFTGTLPVVLCCLCAVVYGGKDKPVFSDEIKEIIQTVHDECVGKTGVAEEDITNCENGIFKEDPKLKYMFCLLEEA  
SLVDDDGTVDYDMLVSLIPDEYYERTTKMIFSCKHLDTDPDKKQRAFEVHKCSYGKDPFLYFL

>SnonPBP1

MADSRWWFASFICVIIIMTSSVMSSKELVSKMSSGFSKVLQCKAELNVEGHIMQDMYNFWREEYELVNRDL  
GCMVMCMASKLDLVGDDQKMHHGKAEEFAKSHGADDELAKQLVGIHACETQHQAIEDPCSRTLEVAKCFRS  
KMHELKWAPTMEVAIEEIMTAV

>SnonPBP2

MALHRSPIMSARLALVLIASLFIVVKCSQEVMMKNLTHHFSKPLEDCCKEMDLPDSVITDLHNFWKEDFEFTSRHT  
GCAILCLSSKLELLDPDLKLLHGGKAQFAQKHGADEAMAKQLAGLIHGCMETIREPADDPCVRAQNVVMCFK  
AKIHELNWAPSLDLIVGEVLAEV

>SnonPBP3

MRSNNIIFSVLLMAVGVREIEPSKDAMKYITSGFVKVLEECKELNMNDHIIADLFHYWKLDYLLNRDTGCAIIC  
MSKLLDLLDANGRMHHGNKEFALKHGAGDEVAGKIVDIIHDCEKFERDDDECLRVLEVAKCFRTGIHELWDW  
QPNVEVIINEVFTEI

>HmelGOBP1

MISLLTSLACGVLTGLDATMEVMKDVTGLGFEALQSCREESQLTEDKMEEFFHFWRDDFKFEDREVGCAMKC  
MSSHFNLLTDSHRMHENTDKFIKSPNGEVLKSRMISIIHTCEQQFDALEDHCWRILRIAECFKVACKKEGIAP  
TMELLMAEFIMEADPS

>HmelGOBP2

MAVRCYVVVFLALLALATLPRVSTAEMSHVTAHFGKSLEECREESGLSSDILDEFQHFVSEEFQVHVHRELGC  
AIICMSNKFLMHDDARMHHVNMHDYIKSFPQGELLSEKMNLIHNCEKQFDDIEDECSRVVKVAACFKESAK  
EEGIAPEVAMIEAVLEKY

>HmelPBP\_C

MFKRLTVVVLVFLVGLNKVTSNETLRGITASFLKVLEECRQELNIGDNVLADMYFVKLDRTLIHRDTGCAIVCMS  
KKLNLDDTSGKLHGGNAEEFALQHGAADDMAKKLVTTVHECEQKHELEEDQCLRALEIAKCFRGAMHEINWA  
PKVDVAISEILTEV

>HmelPBP\_D

MAVQKWQLILVMCVLMQACKVSPSQEIMHKLTKGFATAFEQCKQELNLGDNIMQDFLNYWREEYELLNRDT  
GCAIMCMAQKHLLTEDGIHHEKVHGFTKSHGADDELAKQLVTMIHECEKSNAGVSDECMKTLEVAKCFRTKI  
HELKWAPDMETILEEIMTDI

>HmelOBP3

MVGLKALHDIQINKDTIITRNMNLKTDNKISHNHDPDWSYSSFPKEVKSHVEQFKRNMSECLKEVQLNDRQ  
VRRLSPPKESPVHGECLACVLKRNNGVIENGGIYKDNLLSLVRKFGYKDEKLMKKLEKNVDRCEASVKNKDDCTV

ASYLNECTNDLMANNKHKIIVNY

>HmeI OBP6

MENISYKGLFLLLFI AFAHVTLVDSYSHKFFSQNLDTPELSIQYARDKKSDMITNECLTEMYPKNIYRYPLHIDR  
NDVPCIIHCVLKFKGIMSNDGVINTRNYRRVRAIHRYPRLISDVGETCAQNINGMNLHDHVCKKAKVFND  
CTQLY AISYRESDD

>HmeI OBP8

MLIHAVLALIGYTLAAQHRSFSGTMVDLSDPKVQGHLDALVRMAQSCVIKVRASPKDVRA YFTNSPPITRSGQC  
FAACMLEQSDVINHGKVNRELLVHLAGLVNGKNSRVVRKLYGISRLCLDSIEGMSDRCLASTYNDCLNENMIE  
FAFPLDIAEEAVRKMPFH LIQPK

>HmeI OBP12

MKIIIIITLALLTFSVAQCSSVGNRMSTDDITTTT MATTMEDDDARSNFDVMSVMVDCNDTFRVEMSYLES LN  
KSGSFPDETDKTPKCFVRCVLEKSDIVSGDSQFNVTRTAEVFSQIRDT SQNDIIKMATA CSDRPEKCKCERSYQL  
KCLLETTIEINEMKSSK

>HmeI OBP13

MQGFIVHCSIVAILVVGASALEGEMAE LAKMLRDSCIEETGADIALIDKVN DGADLMPDPKLCYIKVMETAG  
MMSQGAVDVEAVVAVLPP ELQRHADKL RACGTKAGANDCDTAF LTQACWQGGCKEDYILI

>HmeI OBP14

MKTLKLLILLFVFFFGDSQGMTDDEMREEFMRITMICS KDYKVD MKDLSLQQLNIPTKKDV KCLLACAYKKTG  
SMNKEGLYDIEASYRIAEMTKNGDPKRENAK KLV DICA KVNDET VSDGEAGCDRAGLIFKCVVENAPKV KNN

>HmeI-OBP16

MFLVILIFQGYSD EERTKIYATMLPHILQCSTEY GITEDELKASKENEKFGSINPCFMGCIFKKI HVINKEGIFNVEK  
AEKLS ENFLVHDEDK KASAVIKACATINDEDVSDGEKGC DRAKLLFECLLPFRQQVILKLIMCIEKATKT

>HmeI-OBP17

MTSLQLVFLVFGVVAVSLGSVSAFSDEERNKIYAGMLPLVLECSKDYGLTEDDLKAAKESGSIGSINPCLMACVFK  
KINVINDKGLFDVDKAGELS QKFLTETDDQQKATEI IKTCASVNEKDVSDAEKGC DRSKLLFDCLLPFKGQVKYNI  
VIIIYSSR

>HmeI-OBP18

MTRQQLKNSSKLLKNCMAKNDVTE DLVGDIEKGFIEDQKVMCYIACIYQMSQLVKNNKLNVEASIKQVDM  
MFPP EMKDATKASIENCKDVSKKYKDLCEASFWTAKCLYEDNPKNFFFA

>HmeI-OBP19

MTRPQLKKTTLIMKNQCMPKHRVTNEKVGQIEQGVFVEDHDVMCYIACVYKTAQVVKNR LDKDLVSKQIDIL  
YP AEI REAVKLSTVKCIPVQYNYEDECEGIFYSVKCLYEDNPANFIFP

>HmeI-OBP20

MTRQQLKNSGKLMKKSCMPKNDVTE DQIGQIEQGFLEERNVMCYIACVYTM TQVVKNNKLN YEATIKQVD  
LMFPPDMKDAVKA AVEHCKDISKKYKDICEVSYWTAKCMYDFDPNNFVFP

>HmeI-OBP21

MTMKQIKNTGKMMRKTCPKNNVADEKIDPLNKGEFIEEKEVMCYVACIMKMANTIKNNKLN YEAAIKQAD  
MLFPDEIKEPAKEAITACRKVDDYKDLCESSFYTTKCIYNYNPSIFFFP

>HmeI OBP22

MGNSIKKDEEQHAMFRIKFYYIVIFLIIFTAFILVMAFTPLTKDEQIDKFNKMNEGVEPFRRNLTECARQVKAS MV  
DVENFLKRIPQTSLQ GKCFVACILKRNSIIKNNKILKENLLEANKAVYGEDSEVLSRLKLAIN ECSDVVANIFEICEFS  
SVFNDCMHMKMEHILDKVIMERRMEALGQMTGDPDVW TDEEDEL LKLVKDEL

>HmeI OBP23

MQSAALLAAVFLALITFGFGQKEKPEFSEEI KEIIQHVHNECVAKTEVTEEDIANCENGIFKEDIKLCYMFCLLEE

GSLVDENDNVYDMMISLIPEQYTDREVSKMITACKHLDTDPKNCQRAFDVHKCSYSDPKVNF

>HmeI-OBP2

MSILLCFLFLSIALIDGKTVNIPVDPDITSQLVQISADCIASNGLTEEVLKQVMEWKLENNEPTKLLFCFGTKLNT  
TDKNGHVILNEALKLAVSKRPFVFGDAIKRCNDQEGSDKYDTLFKIIICMRDQENIFLRF

>HmeI OBP9

MLVFILFSAHNMENKCEDEVSPTCVPSVDPIEECIEKLHVNRALVEKLSGNSKLFDKNLKRWLLCFFEKTCVMT  
PDGVLRQDVVLKDPDQDKSIEKITSICLYQKLHFAVDTAWNYLNCFREKDPKYSVIANKI

>HmeI OBP10

MKTFIVLAICFVAAQALTEQKDKLKKHKSECLAETKVDEKLVDKLKTGDFEIE NEPLKNYTL CMLVKSGLMSMD  
GEFKKDVALAKVPNAADKQLVGLQDLIDCLANKGAPEETA WNYSKYHQKDAKHSIFQ

>HmeI-OBP11

MKTFIVLAICFVAAQALSDEQKDKLKKHRSECLAETKADEQLVNKLTGDFKTENEPLKKYSLCMLIKSELMTKD  
GKFKKDVALAKVPNAADKPAVEKLIDLCLANKGNTPHQTAWNYSKYHEKDPKHSIFQ

>HmeI-OBP24

MRAVWCLLAVSLAVVSGKVLDTLVIVPPERVPGIVQASSKCIEMNLDKDTMQKFFSWQLGDSESTRKMYCL  
GVKSGYIADDGSMVKKEVLGLAGSHGGNIDGVIDECNNLKYSKYEAVFKIVMCFHEKSKLEFKV

>HmeI OBP27

MDTGKMRAVWCLFLVTLATVYAGNVKVEYVDIPKDYIPAVEKASFECIKLKL EEEQISLQGFLNWELSESNTK  
KYIFCLANGSGFFADDGSILKDKVLAIMGKYRDRVDKVIDECSKVYDNKYEEVYRMEVCFRDL SGLYFRM

>HmeI-OBP28

MNTLWFFLFLSIALVKGKALFHPPEYAGEILKAAADCIDSTGAGVDAVQKVISANLENTEPFKFLYCFSSKSGYV  
DSDGHFIVDQMTKLIGNHKDKAKFIDNLNLCNKSEGGNTIDTIYQIAVCFKDN SPIYFTV

>HmeI-OBP29

MKTFWCFLFLSIALVSGRAIVNVSQEFTGDILKTAVDCTDSSGAGVDALQKMASANFEDTEPFKFLYCFASNSG  
YVDSGDGHFIMDKMTKLIGNHKDKAKYVDAINLCNKRKGGRTIDTIYELANCFKDHSPYFTL

>HmeI-OBP30

MFDIPKEFVPDIIKASAECADKLGDLTLNILSKFFSGELKDSSESVRQYMYCLGTTSGYVND DGRLNKDRLGKVVG  
EHKSKVESVDECNKAKASDKYETVYKAVVCFRENSGLQFKI

>HmeI OBP31

MLMRKNPICIYISIIYLGVQYVLEVIKVPKEFIDDAINGSGQCAEELGLPGDTLNKLLSNNFEDSQAMRKYIYCLG  
IALDVGDTGTSLKHSLSKYASNDRRKAETKTIDECNKEKASDKYKAYKVSTCYLNTSSVQFKV

>HmeI OBP35

MKVLII CVGLFALIEAHNIHLSHGQKEKVKEYAAECMKESGAKPEVLADAKKGHVLDDEGLKFFILCFFQKTGVLS  
SDAKLNTDVALSKLPAGIDKVTA AKVLNDCNKKGATHADTA FEIFKCYTHTKQHILFEK

>HmeI-OBP1

MSVRVLFIFIIVTACQANIQVSPPVTCGYLPRAIHECIGSPHIVKPEISAQCSKSISECERMTCVFQKSGWMSGNA  
VDKDKVKS YFDQFSTDNPQWALAVNHVKAACL NMDLPSQGVYLNCPAYDILTCVFSGFIKNAQPDQWSSSES  
CSYPRQFASACPYCPSDCFAAQVPIGSCNA CLALPRSP

>BmorCSP1

MKCLTIAALLFVAGLSIAEKYTDKYDNIDVDEILENRKLLVPYIKCVLDEGRCTPDGKELKAHIKDGMMQTACAKCT  
DKQKVSARKIVKHKIQHEADYWEQMKAKYDPKDEFKEIYEGFLAGQN

>BmorCSP2

MKSVILICFLGVATVVIARPKTPFDNINIEEIFENRRLLLGYINCILERGNCTRAGKDLKSSLKNVLEENCDKCEDQ  
RKSIIKVINYLVSSEPESWNQLKSKYDPEGKYLIKYEAKMESN

>BmorCSP3

MNSLIAFCLFAVLAVALARPDDKYTDKYDNDVNLDEVLSNSRLLQPYIKILDKDRCAPDAKELKEHIREALETECA  
KCTEAQKKGTRRVIGHLINNESKSWNELTAKYDPENKFTAKYEKELREIKA

>BmorCSP4

MKVLIVLSCVLVAVLADDKYTDKYDKINLQEILENKRLLSYMDCVLGKKGCTPEGKELKDHLQEALETGCEKCTE  
AQEKGAETSIDYLIKNELEIWKELTAHFDPDGKWRKKYEDRAKAKGVIPE

>BmorCSP5

MKTIVIVCLLALTAVALARPEQYTDKYDVTVDLDQLISNRLLIPYVHCILEKGQCTAEGKELKSHIKEALETNCAKCT  
KAQKGGTEKMIGHLINHEAEFWHEELKAKYDPTNEFTKKYETELKRVTA

>BmorCSP5a

MNSLIAFCLFAVLAVALARPDDKYTDKYDNDVNLDEVLSNSRLLKPYIKILDKDRCAPDAKELKEHIREALETECAK  
CTEAQKKGTRRVIGHLINNESKSWNELTAKYDPENKFTAKYEKELREIKA

>BmorCSP6

MKSLIVLSCLLAACLAADLSKYENFDVEPIVTSRLLKAYINCFDLDKGRCTPEASDFKKALPDIATNCGKCTEKQK  
ANVRKVIKVIQQKHSTEWELVKKHDPGKHRADFDKFLGGS

>BmorCSP7

MKGFYVLCFALFAAVYCKETYSSENDDLIEALVGNIDSLKAFIGCFLETSPCDAVSGDFKKDIPEAVAEACGKCTP  
AQKHLFKRFLEVVKDKLPQEYEAFTKYDPQGKHFDALLSAVANS

>BmorCSP8

MKTILILCALVSVVCRPEEYSSQYDNFDVEQLVGNLRLKKNYAKCFDQGPCTAEGTEFKKRIPEALRTKCAKC  
NPKQRHLIRTVVKAFTKLPDLWEELAIKEDPKGQYKHEFTAFINAMD

>BmorCSP9

MKFVLAIALAVVVAARPNDLFYDKKYDNFNVDIIDNPRLLKAYTFCFNDKGKCTAEGNDFKKWIPESLQTS  
GKCSEKQKYLVAKFVHAIKDKMPDEFDILRKLHDPKGEYTENLDKFLETYGH

>BmorCSP10

MKSSLFCVLVLTVVVSSSRQSQSYPRNDNININAILQNDRILLGYFKCVMDRGPCTKDGKTFKRALSEALPTACAR  
CSNKQKAAFRTLLLAIRARSEPSFLELLDKYDPSRSNRELLYTFATGL

>BmorCSP14

MKSSLFCVLVLTVVVSSSRQSQSYPRNDNININAILQNDRILLGYFKCVMDRGPCTKDGKTFKRALPEALPTACAR  
CSNKQKAAFRTLLLAIRARSEPSFLELLDKYDPSRSNRELLYTFATGL

>BmorCSP14a

MACVAVTWARPESTYTDKWDNINVDIIESNRLLKGYVDCLLGKGRCTPDGKALKETLPDALEHECVKCTGKQ  
KSGADKVIIRHLVKNRDLWELAVKYDPDNIYQARYKDKIDAVKGSA

>BmorCSP11

MKLTSLVGMAMVSAEFYSSRYDDFDVKPLVENDRILQSYTNCFLDKGPCTPDAKEFKKVIPEALETTCGKCS  
KQKQLIKTVIKAVIERHPEAWELVNKYDKDRKFRPSFDKFINEDD

>BmorCSP9a

MRAVIFLYTCVFFVVGQDINAMMSMPKYDERYDYLVDVDFRNRKRLVRNYVDCLINAQRCTPEGKALKRILPE  
ALRTKCIRCTERQKRTSVKIRRLKNEYPEEWAKLASRWDPTGDFTRYFEDYLAKEHFNTIPGSGPTVNVLSLQ  
TPPPPPPPSRPASVFTNPPPPVMSTSPRPVVLNRFRR

>BmorCSP13

MKLLLVLGLFLAVLAQDKYEPIDDSFDASEVLSNERLLKSYTKCLLNQGPCTAELKKIKDKIPEALETHCAKCTDK  
QKQMAKQLAQGIKKTPELWDEFITFYDPQGKYQTSFKDFLES

>BmorCSP12

MFMLFIISFIIVPLKCCGTETSTYTTQYDEVDIKEIMGNERLLVAYIGCLLDKNPCTPEGKELKRNIPDALQSDCSK  
CSDKQRENADAWIEFMIDNRPEDWTKLEER

>BmorCSP15

MIENFYSKCTISKSVLFLCLIFLALNPKYYSRYDYDIDHLVQNPRLKKYLDCFLGKGPCTPIGRFLKQVMPE  
VITTACAKCTPTQKRFAKTFNAFRRYFPETLMELRRKFDPESKYYDAFEKVTNA

>BmorCSP16

MIEWKRFKILHFLSYLGLLVVVCAAQQNRPQVTDALDEALNDRFIQRQLKCALGEAPCDPIGKRLKTLAPL  
VLRGACPQCSPQETKQIQKTLQSYVQRNFPQHWAKLVRQYAG

>PxutCSP1

MNSLLFLSLLTFVAFANEQYTDYDNINIDEILSNKRLLSYIKCILDKGRCTPEGKELKHLIKDGMQNSCSKCTD  
FQKNGARKVVKYIRANEKESWEEMKKKYDPKDEYKEKYEAFLAADN

>PxutCSP5

MKLLPILVIAACVVMVKAGTYTDYDSMNVDVIANKRLFIAYVKILNKGRCCTPEGKELKSHITEALQSGCDKCT  
ARQRRSIRKAIKHLIKENNYWNQLVNMYPNKMYSKMYERELGTI

>PxutCSP7

MKLIVLVLCVTALAYAEDKYEDIEDNFNLQELLENDRLTGYIKCLLNKGPCTPEVKKIKEKLPALATNCAKCTDKQ  
KQMGKVLVKQVKAHPELWDELKNLYDPQKGYQKEFQQFLSD

>PxutCSP3

MKTLVVLACVLLSVYAADKYNSKYDNFDVETLITNERLLKSYINCFDLDKGRCTAEGTDFKKALPEAIETTCKGKTEK  
QKLNIRKAIKAIQKYPGWEDLVKKNPSGKHRANFDKFIQGS

>PxutCSP2

MKLFMVCALLCVAVAWGWKPASTYTDKWDYINVDEILESQRLLKGYVDCLMDRGRCTADGKTLKETMPDALE  
HECSKTEKQKESDKVIRFLINKRPELWELATKYDPDNVYQQRYKDKIEAVKEH

>PxutCSP10

MKLILMILASTIALVQGDAKQRYDAFDIQTALQNDIILSLINCFDTPCSPKAFKNDIPTALQTACGKCS  
RQREVIRHVIRTVMKKYPDAWYTLIDKYDPENKYRDFGYQFIGQDD

>PxutCSP6

MKTIILLCTLAAAALAAPADTYNSQYDNFDATLVGNTRLLKSYGRFCFLGQGPCTAEGSDFKKTIPALRTTCAK  
TPKQRELVRVVVRGFQTKLPEIWEELVKQDQPKGEFKEAFDRFLNSSD

>PxutCSP4

MNTFLMVCLLALVAASADQYTDYDNVDLDEILSNRLLVPLYLNCILEEGKCSPDGKELKSHIKEALENNCGK  
TETQKSGSRKVIGHLINNEKEYWGLTAKYDPERKYVTKEYSELKIAA

>PxutCSP8

MKSKAALVLMCVLAAALAESYSKYDNIDLQEIADNDRLLDAYANCLLEKGCSPGKELKSHIEMKDAIETGCEK  
CTDAQKKGTFMIDHLIRKKPEIWNQLANKYDPTGKWRKVYEDRAKEHGIVIPH

>PxutCSP8a

MVSRNLMILCCLLVAVVAKPTYTDKYDNIDLEEFKENRLLAYVDCILDGKCTAEGKALKDNLLDATETGCEK  
TEKQKEGSYEMIEHLIKNEPEIWNELCAKYDPTGKWRKEYEAKAKGKIPQKISTK

>PxutCSP9

MQINHIVIALCALAATCLAQAQTDRPPVSDALEALNDRFIQRQLKCALGEAPCDPIGKRLKTLAPLVLRGACP  
QCTPQETKQIQRTLSYVQRNFPQQWAKIVRQYSG

>PxutCSP8b

MASKSLIILLCVVASVWCTYTNKYDNINYEVSNEKLLNKYADCILDRGRCTAEAKELKEHLKEAIENGCKE  
KQEGTNYVIRYLIENKRNLWELCAKFDPDGKWRKHVEEAKAKGKIP

>PxutCSP13  
MRQWLLCVFALTVVVSCSSQQQYVNRYNDFNADSIQNERILLAYYKCVMEKGPCTKDGKNFKRVLPELISTAC  
GRCSPKQKVVVRRKLLGIRAKSEPRFFELDKYDPSRLNREALTYFLVTGN

>PxutCSP11b  
MKCLLLPMLMALVAAETYSTENDDLIEAVVGDNLTKSFMDCFNDDKKPCDAVQADFKDLPEAFQNAKAK  
CTAAQKHIFKRFLEESEKVVDDLALNKKKYDPESKHYYAALLSAISKS

>PxutCSP12  
MVFLSLVLAMLIPTALSYYDAAYDKVDANKVLADDALFRSYVDCFLDRKPCTADFSEEFKILPEVIKEACAKCSEP  
QKKNVRKIVKALYKYPDDAIKFADKYDPKRDYESAFAAFVAEE

>PxutCSP11a  
MKTIVALTVLVLGATTALAYSTEHDLDIAAIVADKNELQKFIDCFTEKAPCTKLTQDFKTKLPEVVREACEKCNPT  
QKQKLIKIFLDGLNEKFPEEYNALKKQFDPTGKLFALNAALAKA

>PxutCSP4c  
MKVLVCFLLALVIAQARSNRKYTSRYDNIDLDDVLANRRLLVSYIKLLDLGKCSSEGKELKSHINDALEDNCAQC  
TDVQKSGFRRVIGHLINHEKDYWGKLTAKYDPERKYVLKYERDLREISA

>PxutCSP4b  
MAIATAMPSPSETYTDRFDNIDLDEIIGNRRLLVPYIHCVLDKGKCTPDGKELKSHIAEAIENDCAKCTEVQRKGT  
RKVLGHLINNEQEFWDELRTARYDPEHKYSVKYENELRTSK

>PxutCSP4a  
MKSVVLLCLFVVLATAVAGPAGQYTDYDSINIDEILGNRRLLIPYVHCLLDQGKCTPEGKELKSHIKEALENNCAK  
CTPPQRTRSRQVIGHLINHEPTFWNELCQKYDPTS KYTRKYEELRTIAA

>BmanCSP3  
MNSLIAFCLFAVLAVALARPDDKYTDYDNVDLDEVLSNSRLLQPYIKILDTRCAPDAKELKEHIREALETECAK  
CTEAQKKGTRRVIGHLINNESWNLTKAYDPENKFTAKYEKELREIKA

>HarmCSP26  
MDSRIAVVCVLAFAVDQTVGAPQKDAVAASGPAYTTKYDHIDVDQVLASKRLVNSYVQCLLDKKPCTPEGA  
ELRKILPDALKTQCAKCNATQKNAALKVV

>HarmCSP17  
MKYAIIFAVVALATIVYAVPRPDGEKYPTKYDNVDVDSILANDRLLKNYIDCIEGTGKCTPEGDELKRHLKDAIQN  
CCEKCSDKQKDGKVKVFKHLEDKPK

>HarmCSP  
MKVLLVLCLFAAAALADDKYTDKYDNINLDEILENKRLLLAYVNCVMERGGKCSPEGKELKEHLQDAIETGCSKCTE  
AQEKGAYKVIEHLIKNELDIWRELAAYDPKGDWRKKYEDRARANGIQIPE

>HarmCSP16  
MKILVLLAAVTAQYEEEDTYGTDHDDLIDVALVEDKQFNSFIDCFIDEAPCDDVAETFKSVIPEAVLEVCAKCTP  
AQKHIVRVFNESFKKMPKFKQKFNKYDPEGKYFENFEAAVGAF

>HarmCSP8  
MKCIYVLSFLLALAAVQAEDKYSTENDNLIDAVVANVDTLTSFVACFVDQEPDAVAADFKKDIQEAVTTRCAK  
CTDAQKHIFYKIFILGKEELPRGYEEFGRKYDPENKHFSALENAVSPA

>HarmCSP21  
MKSLLLCLVIAAVWARPETYDTRYDDFDAETLVENVRLKAYGHCFGLTGPCTPEGSDFKKTIPDALRTGCGKCT  
AKQRHLIRVVVQGFRSKTPDLWQQLVKKEDPNGQYKEVFRFLNGSD

>HarmCSP19  
MNSLIVFCVLSLAALTIARPDGATYTDKYDNVDLDEILGNRRLLMVPYIKMLDQGKCAPDAKELKEHIREALENG

CAKCTDKQKEGTRRVIAHLIKHKNADWQKLKAKYDPEGKYTHKYEKELEEVQH

>HarmCSP10

MKVLVLSCLIVAFAADKYNAYDNFDVDTLITNDRLLKAYINCFDKGRCTPEGSDFKKTLPEAIETTCKGCTD  
KQKNNIRKVIKAIQQKHPKEWDALVKKNDPSGKHRANFDKFIQGSR

>HarmCSP20

MKLIVAVALLCLVAESWAASTYTDKWDNINVDEILESQRLLKAYVDCLLDRGRCTPDGKALKETLPDALENECSK  
CTDKQKSGSDKIRHLVNRPEMWKELSAKYDPNNIYQDRYKDKIEAVKGQ

>HarmCSP22

MQTRYAVVLCCVVAACVAQTQRPPVSDSALEDALQDKRFIQRQLKCALGEAPCDPIGKRLKTLAPLVLRGACPQ  
CTPQETKQIQRTLSYVQRNFPQQWAKIVRQYAG

>HarmCSP14

MNSAIVLCVVALAGMVLARPDGDGDKYTSRWDDVDLDEILENDHLLIPYIKCSLDEGKCAPDAKELKEHIQEAL  
ETGCAKCTDKQKEGTRRVIAHLIKKLEWEKAKYDPEGKYAKKYEKELEEVKNA

>HarmCSP23

MKAVFLLCLVVAVSARPEAQYTNKYDNVNLDEILVNRLLVPYIKCALDQGKSPDRELKSHIREALENYCAKC  
TPVQQDGTRRVIAHLIKHLEWEKAKYDPEGKYTHKYEKELEEVQH

>HarmCSP18

MKLLVVAIVVTLAAFAVAETYTDYDNINIDEIENRLLVPYIKCVLEQGRCTPEGRELKAHIKDALQTSCTKCTQK  
QRKASRKVVKHIRANELDYWKQLLAKYDPDSIYVKNYESFLAADD

>HarmCSP9

MNSLIVFCVLSLAALTIARPDGATYTDKYDNVDLDEILGNRRMLMVPYIKCMLDQGKCAPDAKELKEHIKEALENE  
CGKCTEAQKKGTRRVIGHLINHEADFWNELAAKYDPERKYTTKYEKELKEVEA

>HarmCSP12

MNSAIVLCVVALAGMVLARPDGDGDKYTSKWDNIDLDEILGNDRLLVPYIKCALDEGKCAPDAKELKEHILEAL  
ETGCDKCTDKQKEGTRRVIAHLIKYKLEWEKLRKYDPEGKYAKKYEKELEELKRA

>HarmCSP11

MNSAIVLCVVALAGMVLARPDGGTYTTKYDNVDLDEILANDRLLIPYIKCLLDEGKCAPDAKELKEHIREALENG  
CAKCTDKQKEGTRRVIAHLIKHKNADWQKLKAKYDPEGKYTHKYEKELEEVQH

>HarmCSP24

MKTAIVLLLALFGVLTARFDNIDDKVLGNQRVLESYLKCMYDEGPCTPEGRDLREKAPEALETNCKDCTDNQK  
ALVRKASFLIKNRPDDWKKLSDKFDPEGKYKAFDEFLEKEN

>HarmCSP13

MKVLLVLCFAAAALADDKYTDKYDNINLDEILENKRLLLAYVNCVMERGGKCSPEGKELKEHLQDAIETGRSKCTE  
AQEKGAYKVIEHLIKNELDIWRELAAYDPKGDWRKKYEDRARANGIQIPE

>HassCSP

MKVLLVLCFAAAVLADDKYTDKYDNINLDEILENKRLLLAYVNCVMERGGKCSPEGKELKEHLQDAIETGCTKCTE  
AQEKGAYKVIEHLIKNELDIWRELAAYDPKGDWRKKYEDRARANGIQIPE

>AipsCSP1

MKAVIVLCALVVAVCARPEEEKYPDKYDNTNYKEILENDRLYRAYCDCLLDAGKCTPEGKELKSRIKDALETCKEK  
CTDKQKEAVRYVIKYLINKPEDWKKVCDKYDPDGKFSQYKELKDL

>AipsCSP2

MKIILALCVLVAASVAYDTRYDDFDVETLVGNVRLLSYGHCFGLTGPCTPEGTDFFKKTIPDALQSGCGKCSPKQK  
HLIRTVVKGFTKTPDIWQQLVKKEDPHGEYKEIFTRFINGS

>AipsCSP3

MNSFIVLCIASLAVMAYARPEEAKYTDRYDNVDLDEVLSNRRLVYPYVKILDQGKCAPDGKELKEHIREALENEC  
GKCTETQRKGTTRRVIAHLINNEADYWNELTVKYDPQRKFTAKYEKELKEIKQ

>AipsCSP4

MKVVLLTLCFALGVLAQDKYESVNDDFDVSKVLNNDRLLSYAKCLLNKGPCTSEVKEVKAKLPEALETRCAKCT  
DKQKQMGKVLAEVKKNHDPDIWKELVAMYDPQGKYQEAWKEFLQE

>AipsCSP5

MQIKYALLCCVAAMSVAQTQRPAVSDTALEDALQDKRFIQRQLKCALGEAPCDPIGKRLKTLAPLVLRGACPQC  
TPQETKQIQRTLSYVQRNFPQQWAKIVRQYAG

>AipsCSP6

MKLIIVALLCMVAASWGWKASTYTDKWDNINVEILESQRLLKAYVDCLMDRGRCTPDGKALKETLPDALENE  
CSKCTEKQKSGSDKVIHVLNKRDLWKELSTKYDPDNIYQDKYKTQIESVKQ

>AipsCSP7

MKFVLLLCVMVAVVYAEDKYTDKFDNIDLDEILNRRLLSYFNCVMSGKCTAEGKELKDNLEDAIKTGCAKCT  
ENQEKGSYRVIEHLIKNELDLWRELCAKFDPTGEWRQKYEDRARANGIEIPKD

>AipsCSP8

MNFLVLSMVIALAGFVAAETYTDYDHIINDEIENRLLVPIYKCTLDQGRCTPEGRELKAHIKDAMQTSCSKCT  
PKQRKGARKVVKHIRAKEQEYWNQILAKYDPENQYSENYEAFLAADD

>AipsCSP9

MMMHSLSMMLLVLYLVQSKAIETPTYTTKYDGIDLDEILNRRLLTGYVNCMLDLPCTADGKELKKNIPDAIE  
NDCKKCTDRQREGSDRVMHYLIDHRPDDWVKLEEKYNSDGSYKMKYLSSKPIEETKESNVTKSDEDTKDAAKE

>AipsCSP10

MKAECVLLATLTVAAADFYSKYDSFDVQPLLENDRILLSYTKCFLDQGPCTPDAKDFKKVIPEALQTTGKCTP  
KQKQLIKTVIKEVIARHPEAWEQITDKYDKDRYKESFDKFLAEE

>AipsCSP11

MRAVLLLCVAVVYVVGQDVNQMENLPKYDSRYDYLDIDAIFTNKRVLVRYVDCLINAVRCTPEGKQLRKILPEAL  
RTKICIRCTERQKRTAVKVIKRLKYEYPDEWAKVSSRWDPDPTGFTRYFEEFLAKESFNSIPGSGIAIPTSQPLAPPAP  
TMPPTVASPAPAPTEPTPPRPVVLNRFGEIMQGSPPSAGVTPSPMTQATTRPTTTMRPTMRPSMRPTMT  
QPATNPTRPTIMTMTWAGAASNTQPTRFPLRPVSDLPTPYSTAITIIDQIGIKIIRTELFTDILKNTVRAVVGR

>SlitCSP1

MKSFIVLCLFGLAAVALAKPNGSTYTDYDNVNLDEILGNRRLLTPYIKCILEEGKCTADGKELKSHIREALEQNCA  
KCTDAQRSQTRRVLGHIIINNEEESWNRLKAKYDPESKYTVKYELELRKQ

>SlitCSP2

MKSMIVLCVLSVAALVVARPDDSHYTDYDNVNLDEILSNRRLLVYPYVKILDQGKCAPDAKELKEHIREALENE  
CGKCTETQKNGTTRRVIEYLINNEEYWNELTVKYDPERKYTAKYEKELKIKI

>SlitCSP3

MKVVFLVCVLAADVVAHPHESHYTDKWDNIDLDEILNKKILASYVKCCLDQGKCTPDAKELKSHIKEALENRCG  
KCTPAQKDGTRKVLTHLINYEPBMWNLCEKYDAEGKYRKMVEDEYKSVKH

>SlitCSP4

MKFVVLVCLMAAAVLAEDEKYPKYDNIDLDEILANKRLLTAYVNCIMERGKCSPEGKELKEHLVDAIETGCSKCT  
EAQEKGAYKVIHILQNELDTHWELTDKYDSSGKWRKTYEDRARANGIVPE

>SlitCSP5

MKVALLTLCFALGVLAQDMYENANDNFDISEVLGNERLLNSYAKCLLNKGPCTPEVKQVKDKLPEALETRCAKC  
TDKQKQMGKTLAEVKKNHDPDIWKQLVAMYDPEGKYQQAWKDFLQE

>SlitCSP6



MQIKYALVLCVAAVSLAQTQRPPVSDTALDDALQDKRFIQRQLKCALGEGPCDPIGKRLKTLAPLVLRGACPQC  
SPQETKQIQRTLSYVQRNYPQQWAKIVRQYAG

>SlitCSP7

MKADCLLIMTLMAVVAADFYNKYDSFDVQPLENDRILLSYTKCFDQGPCTPDAKDFKKIPEALETTCGKCS  
PKQKQLIKKVIKAVIAKHPEAWEQLSDKYDKDKKYKDSFDKFLAEKE

>SlitCSP8

MMKKSFITMMLLIYLIQSNATETSTYTSKYDGDLDLDEILSNDRLLTGYVNCLMDLGPCTADGKELKKNLPDAIEN  
DCKKCTERQREGADRVCHYLIDNRPEEWTKLEEKYKSDGSYRAKYLASKEATDEKASNVNTSNEDTNNVSKE

>SlitCSP9

MNFLVLSIVVTMAAFVAAETYTDYDHDINIDEIENRKLVPYIKCTLDQGRCTPEGRELKAHIKIDAMQTSCSKCT  
EKQKKGARKVVRHIRAKEQEYWKQILAKYDPEDQYKENYETFLAAED

>SlitCSP10

MRVLLLLCALVHLVVGQDVNDMVNMPKYDQRYDYLDVDAIFTNKRLLVRNYVDCLINAVRCTPEGKALKRILPE  
ALRTKCVRCTERQKRTAVKVIKRLKNEYDDEWSKLASRWDPTGDFTRYFEEFLAKEHYNTIPGSGSALPTSSPLA  
PPRVPQSPPATNPTPGTEPTPPRPIVLNRFGDDGELMMGSPSSAGITPRPMTQATTRPSTTRPPSTRPVPPR  
PTMMTWAGAASNTQATRFPLRPVSEISPPYSTAITLIDQIGYKIIKTTELVDLLRNTVRAVVGR

>MbraCSP1

MKFVLLLCVMVAAVVAEDKYTDKYDNINLDEILANKRLLVAYVNCVMERGGKCSPEGKELKEHLQDAIENGCKKC  
TENQEKGAYRVIEHLIKNEIEIWRELTAKYDPTGNWRKKYEDRAKAAGIVIPPEE

>MbraCSP2

MKSCIVLCVLSVAVMALARPEEAHYTDYDSVDLDEILGNRRLLMVPYIKCILDQGKCAPDAKELKEHIREALENE  
CGKCTETQKNGTRRVIGHLINHEDAYWKELTAKYDPQSKFTAKYEKELKEIKH

>HvirCSP1

MKFIVAVALLCLVAESWAASTYTDKWDNINVDLDEILSNRRLLKAYVDCLLDRGRCTPDGKALKETLPDALENECSK  
CTEKQKAGSDKVIRYLVNKRQDLWKELSAKYDPNNIYQDRYKDKIEAVKGQ

>HvirCSP2

MALARPDGAAYTDKYDNVDLDEILSNRRLLVPYVKCILDQGKCAPDAKELKEHIEALENECGKCTEAQKKGTRR  
VIGHLINNEADYWNELTAKFDPEKKYVQKYEKELKEVKA

>HvirCSP3

MKVLVLSCLVVAFAADKYNAKYDNFDVDTLITNDRLLRAYINCFDQGRCTPEGSDFKKTLPEAIETTCKGCTD  
KQKNNIRKVIKAIQKHPKEWDDLKKNVPSGKHRANFDKFIQGSR

>HvirCSP4

MKFLLVLCVMAVALADDKYTDKYDNINLDEILENKRLLLAYVNCVMERGGKCSPEGKELKEHLQDAIETGCKCT  
EAQEKGAYKVIKNEHLIKNELDIWRELTAKYDPKGDWRKKYEDRARANGIQIPE

>HvirCSP5

MNSLIVFCVLSAAAMALARPDYTDKYDSVDLDEXLSNRLLVPYVNCLEQGKCAPDAKELKEHIREALENAC  
GKCTEAQKNGTRRVIGHLINKEPEFWNQLKAKYDPNNKYQKYEKELKEVQEDKQ

>HvirCSP6

MKFLVVAILVTMAAFVVAETYTDYDNIDIDEIANRKLVPYIKCILDQGRCTPEGKELKAHIKIDALQTSCTKCTD  
KQKASRVVVKHIRAKEQDYWKQLLAKYDPDSQYVQNYESFLAGDD

>HvirCSP7

MKAIFFLLCALVVAVHARPEQYAKYDYVDYKEPVANRRLLVAYIKCILDQGKCTPEGTELKSHISDAMKTNCSKCT  
PKQREGTRYVIAHLIKHEPEYWKQLCDKYDPEGKYASKYEKELKTDS

>HvirCSP8

MKILVLLLAHVTAQYEETYGTDHDDLVDVAVVSDKEQFNSFIDCFIDEGPCDEVAATFKSVIPEAVLEACA KCTP  
AQKHLVRFVFNESLKKKMPKQYKYNKYDPEGKYFVNFEAAVGF

>HvirCSP9

MKADCLLIVTLVAVVAADFYNKYDSFDVQPLENDRILLSYTKCFDQGPCTPDAKDFKKVIPEALQTTGKCS P  
KQKQLIKTVIKAVINRHPDAWNQLIEKYDKDKNYKESFDKFLAEQD

>HvirCSP10

MKVVLITLCFALGLLAQDQYESANDNFDISEVLTNDRLQAYANCLLNKGPCTPEVKQVKEKLPEALETRCAKCT  
DKQKQMGKTLAQEVNKNHPDIWKQLVSMYDPQGKYQQAWKDFLQE

>HvirCSP11

MKCVVYVLSFLLAVA AVHAEDKYSTENDDLDIDAVVANLASLREFVGC FMDAVTCNAIAADFKKDIPEAVSTQCA  
KCTDAQKHIFYKFLGLKEKLPNDYQAFKIKYDPDNKHFSALEDAVSGA

>HvirCSP12

MNSAIVLCVVALAGMVLARPDGDGDKYTSKWDNVNLEILANDRLLVPYIKCVLDEGKCAPDAKELKEHIKEAL  
ETGCAKCTDAQDGTTRRVIAHLIKKVEEWEK LKAKYDPEGKYSQKYEKELEEVKNA

>HvirCSP13

MKAVFLLCLVAVSARPESQYTNKYDNVNLEILVNKRLLVPYIKCALDQ GKCS PDGKELKSHIREALENYCAK  
TPVQQDGTTRRVIAHLINNEPDYWTQLSAKYDRDGK FALKYKELRTIA

>HvirCSP14

MTGFFLGLVLTQNHDLVAINSFHSAEILLDVLRLAYAIWQIIIGPCTPNIKHVNQHMPKILKARSVKRIYWK NIMV  
KILTHNVSTNHPDI

>SexiCSP1

MKSFIVLCLFGLAAVAMARPDGTYTDYDNINLEILGNRRLLTPYIKCILEEGKCTPDGKELKSHIREALEQ NCA  
KCTDAQRNGTTRRVLGHLINEEESWNRLKAKYDPQSKYTVKYELELRKLKQ

>SexiCSP3

MKVVFLVFLVAVVYSHPHDSHYTDKYDNIDLDEILNKKILTSYINCCLDLGKCTPDGKELKSHIREALEN KCGKC  
TEAQKNGTRKVMTHLINFEPDYWNQLCAKYDPEGKYKAMYKEYKTLVH

>SexiCSP2

MKSMIVLCVLSVAALVVARPDDSHYTDYDNVDLDEILSNRRLLVPYIKCILDQ GKCAPDAKELKEHIREALENEC  
GKCTETQKKGTRRVIEYLINNEEYWNELTAKYDPERKYTTKYEKELKKIKA

>HzeaCSP

MKVLVLCVCLFAAAALADDDKYTDKYNINLEILENKRLLAYVNCVMER GKCSPEGKELKEHLQDAIETGCSKC  
TEAQEK GAYKVIHLIKNELDIWR ELAAKYDPKGDWRKKYEDRARANGIQIPE

>PxyICSP4

MQTVTLCLLAAVAAAAA PADTYDAKYDSFNAHEL VQNRLLKSYGKCFLSKGPCTAEGSDFKRVIPEALKTTC  
GKCTRKQRELVRVVVKGFQEQLPQVWTEIVSKEDPKGEYKDSFAKFLEGS D

>PxyICSP3

MNSLVLVCLALVAVAAARPQATYTSKYDGVNVDEILANDRLMMPYIKCALDHGRCSPEAKELKSHIKEALENNC  
AKCTDKQKPAVRKVIAHLINHKA EWRQLSDKYDPAGKYTAQYEDQLRAVKA

>PxyICSP5

MKVVFLVFLVAVVYSHPHDSHYTDKYDNIDLDEILNKKILTSYINCCLDLGKCTPDGKELKSHIREALEN KCGKC  
TEAQKNGTRKVMTHLINFEPDYWNQLCAKYDPEGKYKAMYKEYKTLVH

>PxyICSP1

MKSAAFIALFLIGKAVCEDKPTYTTKYDNIDLDEILSSERLLTGYVNCLLDQGPCTPDGKELKHTLPDAIDNDCRKC  
TQKQKEGSDRVMGYII EYRPNDWAKLEKKYLS DGSYKKKYLEKKNASENNGDSKSTEAKNKDDEEKKSKGDGE

EK

>PxyICSP2

MQKLTACLVLVAVAAAAARPND SHYTD RYD N V N L D E L I S N R R L L V P Y V K C V L D Q G K C S P D G K E L K E H I Q E A L E N  
NCGKCTDKQREGTRKMIGHLINHEQE FWDQLIAKYDPERKYVSKYEKELKEVKASCCWLV

>PxyICSP

MQKLTACLVLVAVAAAAARPND SHYTD RYD N V N L D E L I S N R R L L V P Y V K C V L D Q G K C S P D G K E L K E H I Q E A L E N  
NCGKCTDKQREGTRKMIGHPINHEQE FWDQLIAKYDPERKYVSKYEKELKEVKASCCWLV

>CfumCSP4

MRSCIVFACLLVSVFAAEKYNSKYDNFDVETLISNDRLLKSYVNCFLDKGRCTPEGTDFFKTL PDAVETTC AKCTD  
KQKTNIKKVIKAIQTRHPRQWDELVKKNDPTGKHIVNFNKFIES

>CfumCSP2

MKSILYLVLTVVVVTC SAQQQYNNRYDNLNADSIVQNERVLLAYYKCVMDKGPCTKDGKNFKRVLPE TLSTACA  
RCSPKQKGLVRTLLLGIRVKSEPRFNELLDKYDPDRSNRDDLYKFLVTGN

>CfumCSP3

MKLLLVSLLA CLVAVAFGRPQNKYTDKWDNINIDEILESRLLKAYIDCLLDKGRCTPDAKTLKDTLPDALENECN  
KCTEKQKSGSDK VIRHLVNRPEM WKELSVKYDPDHIYEGRYKDQIEKIK A

>CsupCSP1

MRTVIFLSLLLVAVIAEDKYDSIGDNININELLENDRLLSYVKCLLNKGPCTPEVKKVKDTLPEALATRC AKCTER  
QKQIGKQLAKEVKKRHP ELWNEMIAFYDPEGKYQDAFQDYLPK

>CsupCSP2

MPSVFTYMIMALT LVAGEFYDAKYDDFDIEPLENDRILQGYTKCFLDEGPCTPEAKDFKKVIPEALETSYGK CSP  
KQRILIKK VIRAMMEKHPDSWNKLV DKYDKDKKFRATFNKFIEEED

>CsupCSP3

MKSMTVFCMLAFVAVAYALPQQYTDKYDSVDL TEILSNRRLLPYLNCILTTGKCSPDGKELRSHIKEALENYCAK  
CTETQKNGTRR VIGHLINNEADYWKKLVDKYDPERKYVVKYEEELKT VAA

>CsupCSP4

MPKYDRRYDYLDLDTLFLNKRLVGNV DCLINAQRCTPEGKQLKRILPEALRTK CIRCTETQKKTAVKVIKRLKYEF  
PEEWAKLSSRWDPTGDFTRYFEEYLDNENFNTISGSIDNNESVPSSRPAPVPVAPTLAPLPPVPPKLPNVPVTRP  
SLPPPTQASTQRIPDATT SVKPVILNRFETTRADDGQPLIC

>DpleCSP

MKTFVVFAMCLAAALPADTYNPEYDNFNAKELVENPRLLKNYGKCFLDQGPCTAEGSDFKKTIP EALRTTCA  
KCTPKQRELIRTVVRGFQKDLPEM WSELVKKEDPKGEYKESFEKFLNGSD

>DpleCSP1

MDQGRCTPEGNTLKVHVTD AIQNSCSKCTEIQKTKARKVVNYIRENNKDVWDEL IKKYDPKDEYKEKYEAFLE  
GKF

>DpleCSP1a

MDSPLYGCRVHRVLQGEASTVPGTSDPGVVSMKTLTPFSLFFMAKLCLGDNSYTTKYDGINLDEILASHRLLTGYI  
NCLLDKGPCSPDGKELKNLPEAIDNDCHKCTQRQK EGADKVMHFIIDNRPEDWDKLEEKYNSDGSYKLYLT  
TKLSENSE DVSKNYDEDEEVNESRDHTSDNDHDT EMENH

>DpleCSP2

MDLFPISVLLVACFTAINTQTYEKRYDSVNIDDLVLSNKRLLAAYVKCVLDQGRCTPEGKELKSHIADALQSGCDKC  
TETQKDGVRKVIKHLIKNERDYWKQLVEKFDPEGVYAEKYEDEIRDV

>DpleCSP3

MFDNIKALSLSAAASSLGCIESKRIIKMRTFVVLACLVSILAAEKYNSKYDNFDVETLVSNDRLLSYINC FLEKGGK

CTAEGTDFKKALPEAVETVCGKCTDKQKVNIRKVIKAIQQKHPTQWEELVKKNDPTGQHRANFEKFIQES  
>DpleCSP4  
MGQPEGCNLSQKMLKSCVVLCCVLCVLDGDEKYTDKYDNVNLQEILENKRLLLEAYVNCILDGKCSPEGKELK  
EHIQDALETGCEKCTDKQMEGTTTTMIDHLVKHERAMWKEKTDKFDPKGIWRKKYEDRAREKGIVIPED  
>DpleCSP5  
MKIFILLLCVFAAVIAEENSIDLSTENIDLTEVVGNDKLIESYANCLINKGPCTPEMEKIKGLLPEAIATKCSKCTEKQK  
EVGSQLIKGVREKHPEIWKLLTTYFDPEEKYRESVEEFLKA  
>DpleCSP6  
MKSCVLLALLSLVAVAWGRPQHYTDKWDNINVDEILESQRLLRGYVDCLVDKGRCTSDAKTLKETLPDALEND  
KKCTEKQKTSADKVIHVNKRPLDWKELAGKYDPKDIYQQKYKNKIEAVKEKH  
>DpleCSP7  
MYHRYIWFVEVCDTTLTSRKNARATNPVQSGPQSSWKKLDREMLLEVVLVQSWLSASEDVEVEVEALWFRISM  
QRLNLEVLNLMFKMKSVMILALFAFVAADKYVLDKIDLSKIENNIEELKIFMDCVLDKGTCSLDYNSYKVHID  
ESFKTAGCKTPEQKQFVSQFFKLYRKVLPQDIEELINKYDPERKYIDLLAEVDKYNV  
>DpleCSP8  
MAVCYCRPDTYTDYDSIDLDEILRNRRLLVPYIKCILEEGRCSADGKELKSHIKEALENDCAKCTKAQQDGTKKVI  
GHLINKENDYWQQLVEKYDPEHKYVEKYEKELRA  
>DpleCSP9  
MATLYIFATISTLVLAEFYSSRYDDFDIQPLENDRILFSYTKCFLDQGPCTPEAKDFKKAIPAELETTGKCSPKQK  
QLIRKVIKAIIEKQPQAWEQLEKYDTEKKYRESFNKFIEEN  
>DpleCSP10  
MKVVIIATLITLVLTQDTYSSDLENFDIDELLENDRLLESYGKCLEYKGPCTSQGREFRKLMPEAIRTNCLKCTLKQ  
REMRKAALKALNVKLPKIWNELVKQEDPKGEYKQKFEDFLQRSD  
>DpleCSP12  
MILVTCVLSYDEKYDRLDVDAILADDQHFTSYLDCFLDKAPCTTEYSKEFRELLPEVIKTACEKCSDTQKVKVRKF  
VKAIFEKKAEMAQEFRTKFDPTGEYEP AFLAFLKQNK  
>DpleCSP13  
MRCLLLALCALTVASGVAQQNQLFHRYDNFNPDSSIIQNERILLAYYKCVMDKGPCTKDGNFKRVLPELSTAC  
GRCSPNQKIVVRKMLLGIRAKSEPRFFELLDKYDPTRVNREALYSFLITGDERNF  
>DpleCSP11b  
MKVIIIVLSALLVSSAETYNSENDLDIEKLVSDPASLGAFDLCFNDKGCDELSDGDFKDLREAVEQACEKCTAA  
QKHIFKRFLEVIKQKADYKIFQQKYDPENKYLPALEAAIAKY  
>DpleCSP11  
MSDMQLERTLADRVMQRHIKCALSEGPCDPTGMRLRTLAPLVLRGSCPQCSSQETRQIRRTLAFVQRNYP  
WEWTKILSHVIVIFAMAALCFAETQRPAVSDTALEDALNDKRFIQRQLKALGEAPCDPIGKRLKTLAPLVLRGAC  
PQCSPQETKQIQRTLSYVQRNFPQQWAKIVRQYSG  
>DpleCSP12a  
MKTIIFLAVIAFAVADPELYDVVTLDMDKMEKDPQEFNSLIDCLLDGRGPCTPVFQTYRGIVQEATENICKKCNYP  
QKRAYWHFLRILRTTNPVYENFRQKFDADNVYVDILESVLRGFANLK  
>DpleCSP13a  
MGMRHFPKNCYKMMIIITLAALLINAVVAEEKYDPLLDMEKIEAGNPNQLKSFLDCLLDRAPCKDVYQGYRDL  
APESIREACRKTTELKIFAYIFFYTLKTLPEEYQNFNRYDPDNIYIDRLENEVSKYRLAAIAS  
>DpleCSP14  
MKSIFLVFLAFVLNCAIADEQYVVLQKVNLSSESDIIGVMKNLMNCFLESPCSEAFESYRVRIPEAFQQACKK

SPEQKRFAAEFIQSLKAEMPEDYNDFIKKYDPENKYFDALEAELNKFI

>DpleCSP15

MKIVYFIFFFIVFGVFADNKYYDSRYDYDIDHFVQNPRLKKYIDCFLDKGPCTPIGRVFKLVLPEIVITACNKCSPS  
QKRFAHRTFEAFRNISPQNYAELRRKLDQPQNKHFNTFLKSIATNS

>DpleCSP7b

MLKGATWQSAYLMVVPSPMDSLIGEEEEERRKRWENGGKSKRGKGGQPALTLIGRSEAIKNYFTPIFCERVYKK  
ERGLKHRHTRLYQAHYIKGIKSKKKMKLLFLLVLVSFAAAEEQFYSLQKIDLSKAEENIGEFKFTDCLLEKGPCSDV  
YESYRVRVNESLQSACGKCTPELKQFAAKFFEILKNYLPQEYDGLKKYDPENKYYDVFMAEVLKYKV

>DpleCSP15a

MKIVILLSLLSVVAANDHFYNNLIPEVLTALAKNPQKIFEFLDCLLDKGPCNDVFEGYRAVSLEAVQQACKRCTAD  
QKRFVQRRQLMNRYSKMKIFITLAALVINAVVAEEELYDPLLLDMREIARNPDQLKSFLDCLLDRAPCNPLYQGYR  
DLAPESIRESCRKCTPALKIFAYVFFTTLKTFLPEEYQNFNRKYDPDNIYDRLEEEVRKYAFGTFSG

>DpleCSP16

MLDKFKGGGPKAIFDIVTAHSAKRTVEYLAMAGLVIESNPPYCTELAPCDFYLFQELKIKIEVFILGALKMRSTINM  
KIVILLSLLSVVAANDHFYNNLIPEVLTALAKNPQKIFEFLDCLLDKGPCNDVFEGYRAVSLEAVQQACKRCTADQK  
RFGNIFMLLRKLLPQEYHNFYKYPKKNKYFDALEAELSKYKYLPL

>DpleCSP7c

MADSPCLPPWILLIEKGGGHERAADALLSFLVGSMSGLLLSALCRIRRRVLSLSIRVIFNGSPFLRQIFNMRT  
LILALVAFAAANSQYVLEKLDMDLLVKNLDELKIFTNCLLEKIPCNKVHESYRVKTLQVQACKKCNPHTKHMF  
WEYLQALKADLPKEYIEFRHKYDPDNKYFDIHEAEISKYAE

>DpleCSP17

MVIIIILAALVINAVVAEQEKYNSSLFDLEEVVNLAPESIREFRKWTLPALKIFAYVFFSTLKTFLPEEYQNFNRKYDP  
DNIYDRLEEEVRKYAFGTFSG

>SinfCSP1

MKLIIVALLCMVAVSWGQRASYTWDKWDNINVDEILESERLLKAYVDCLLDGRGCTPDGKALKETLPDALENE  
CSKCTAKQKTGSDKVRHLVNRPELWRQLSIKYDPDHIYQDKYKTQIESVKQ

>SinfCSP2

MKADYVFLATLMAVVAADFYSKYDSFDVQPLENDRILLGYSKCFDQGPCTPDAKDFKKVIPEALETTGKCS  
PKQKQLIKSVIKAVIDRHPDTWEQLSEKYDKDKKFKESFDKFLAEED

>SinfCSP3

MMKFAILLCVMVAAMAEKYTDKYDNIDLDEILSNKRLLMAYVNCVLDKGCSPGKELKDHLSDAIETGCKK  
CTEAQEKGTQYKVIHLLIKNELDIWRELCDFDPTGTWRKKYEDRAKANGIVPE

>SinfCSP4

MKAVICLCALVVVAIARPEQYTSQYDNTNIPEVLGNQRLLHSYIKCCLDLGKCTSDAKELKSHIQEALETHCAKC  
TKKQEQSINIVLKHLINHEPEYWKQLCDKYDPEGKYAKIYEKELKNAS

>SinfCSP5

MKSIVLVCVLSVAVMALARPEEAQYTDYDNDVLDDEVLGNRRLLVPYIKCVLDEGKCAPDAKELKEHIREALENK  
CAKNEAQKKGTRRVIGHLINHEADYWNQLTAKYDPERKFTAKYEKELKEITV

>SinfCSP6

MMYSALATMLLIYLSQSNAMETSTYTTKYDGLDLEILNRRLLNGYVNCMLDLPCTADGKELKKNIPDAIE  
NDCKKCTDRQRDGS DRV MHYLIDHRPDDWVKLEKKYNSDGSYKMKYLSSKPTGNSVTNVTKSEEDTKNDSK  
E

>SinfCSP7

MKAVICLCALVVVAVARPEEQYTSKYDGTNIPEVLANQRLLHSYIKCGLDQGKCTTEGKELKSHLKEALETHCAKC

TDKQKEATRLVIKHLINNEADYWKQLSDKYDPEGKYAKKYEDELKTVS

>SinfCSP8

MNSFLILCLFGLVMAAVARPNTTYTDKYDSVNLDEILGNRRLLTPYIKCMLDQGKCTPDGKELKSHIREALEEDC  
AKCTKTQRDGTTRVLGHLINHEKDYWNQLKAKYDPQSKYSSKHEELRTLKQ

>SinfCSP9

MKAVICLCALVVAVARPEEQYTSKYDGTNIPEVLANQRLLHSYIKGLDQGKCTTEGRELKSHLKEALETHCAKC  
TDKQKEATRLVIKHLINNEADYWKQLSDKYDPEGKYAKKYEDELKTVF

>SinfCSP10

MQFKYAILCCVAAVSVAQTQRPVSDTALEDALQDKRFIQRQLKCALGEAPCDPIGKRLKTLAPLVLRGACPQC  
TPQETKQIQRTLSYVQRNFPQQWAKIVRQYAG

>SinfCSP11

MKLVCIVLLLTVVAVQAQYSTENDDLNIDALVANEESFKSFVGCFLDRVTCDAVPADFKKDIPDAVKTSTCKTDA  
QKHIFHKFLLGLKEKLPDYEAFKNKYDPGSEYFTALEAAVANS

>SinfCSP12

MKVLVLSALIAFTAAAALSPSELDMLEAFDYDTLFANDEHRNIVFNCMLEKGDGDFKQVAELSREIVKNKCAE  
CSPKQKAKYDVMKKLHDNFEPFYNDLMKKIEAKQE

>GmoICSP

MRLIIAIALACIIGLAYGRPQTKYTSKWDNINVEILESQRLLKAYTDCLMDRGRCTPDAKALKETLPDALENECA  
KCTEKQKQGSDDKIIRNLVNKHPDIWKELSGKFDPNKYTEKYRDQLEKVKQ

>CmedCSP16

MKILAVTLVLTTCVTINTADESTYTTKYDGVINEVLGNERRLLTSYVNCLLDLGPCTPDGKELKNNLPDAIQNDCK  
KCSDRQREGADQVMDYIIDHRAEDWAKLEKKYNSDGSYKKYLERKQAKEAKEAKESKEHDESQEKTE

>CmedCSP7

MMKFATALVLAVCVGLAVGETYSTENDDFDIEALVKNPEEFQKFSGCFLDKNECDAVSGDFKKDIPEAFEQACA  
KCTDAQKHLFNRFSLKDKRPQDFEDFKKYDPEAKYAALEKAVAKA

>CmedCSP

MRPIVAMFLLAIIGLAAAAPAEKTDDSDEVNVEILANRRLLLPYIKCALEQGKCSSSGKKVKDHIKSLQND CET  
CTEKQKKTNAVFKHLINKENDYWNQLIAKYDPQRQYAPKHEKLYLGKA

>CmedCSP6

MKAIILFGLTTLVAVAWGRPGLYTDKWDHINVDEILESQRLLRGYVDCLLDKGRCTPDGKALKETLPDALEHNC  
SKCTEKQKSSSDKVIHRLINKQPDYWKELSTKYDPQNIYQERYKDKIDDVKAKA

>CmedCSP20

MKFLVLSMVFVAVADTYKTTTHDSIDVEAVVTNPDSLKFTGCFLDTGACNEVAASFKKVLPEATEQACAKCT  
PAQKHMLRRYLEEVKKTSPEDFAALNKKYDPEGKYVEALRAAIANA

>CmedCSP18

MRIIILLSCLVVFAADKYSTKYDNFVDVDTLISNDRLLKAYINCFLEKGRCTPEGADFRKALPEAVETTCAKCTEKQ  
KNNIRKVIKAIQQKHPKQWEELKKKTDPSGKFRADFKFIQGS

>CmedCSP21

MKTFTAICLLALAASAAAFPGSDKYTDYDNINLDEIISNKRLLVPYIKCMLEQGKCSPEGKELRSHIKEALENYCG  
KCTETQRDGTTRVIGHLINNEPDYWSQLTVKYDPDHKYVTKYEKELKTVVA

>CmedCSP12

MQKILCIVFLSSVVSTIAYPAPQMTDQGLEQLADRSTMQRHLRCALQEGPCDPVGRRLRILAPLVLRGACPQC  
SVQETRQIQRTLAYVQRNYPWEWAKIVRQYG

>CmedCSP15

MKLVIFACLVALAAVAHAGPQRGYTDVYDSIDINEVLGNRRLLLPYLHCVLGEGKCTPPGKELKSHIKEALETQCA  
KCTPAQRTGTRKVIHLINHEAEYWNKLTAKYDPTGQFTKKYENELRVIA

>CmedCSP22

MKVVVLVFAVIAVALSAKTTYTSKFDNIDVDNINLNKRLLLEGYVKCLMGTGKCTSEGNEKELPEALATECEKCT  
PAQKEKSEKIIRFLVNNRRELWDQLAVKYDPKDEYRQKYLDQAKAKGIDV

>CmedCSP13

MKVLITLCLAAAALAEKYDSVDDNFDISEVLDNERLLNSYAKCLLDKGPCTPEVKKVKDKLPEALQTRCAKCTD  
KQKQIGKKLAQEVKKRDLWDLVAHYDPQGKYQESFQDYLPK

>CmedCSP17

MRSTILLTILAIVALSLAEDTDQAKDTKSKESGKESDKESGNESGKESGKEETYTDRFDNINVDEIVANRRLLVPYL  
KCALDKGRCTPEGKELKIHIQDAMQTACKKCTEKQKTGARQVNVNHIKEKEPLYWEELLAKYDPKNELKPIYEPFL  
AGKDK

>CmedCSP10

MRSWLVLVAVVVSCSAQHYNRYDNFNADSIQNDRVLLAYYKCVMDKGPCTKDGNFKRVLPELSTACGRC  
SAMQKLVVRKLLGIRSKSEPRFLELLDKYDPERSNREALYNFLVTGN

>CmedCSP4

MISTKYLLVLCVAAALARPNDKYTDKYDNLNLQEILENKRLKAYVDCVMGRGKCSPEGKELKEHLQEAIETGC  
EKCTEAQEKGAYTAIEYLIKNELDIWRELAHFDAAGKWRKKYEDRARANGIIIPE

>CmedCSP14

MQIQVLLLVVAAAACAYAAETAHPTVSDTALDDALNDKRFIQRQLKCALGEGPCDPIGKRLKTLAPLVLRGACPQ  
CSSQETKQIQRTLSYVQRNYPQQWAKIVRQYAG

>CmedCSP19

MLYLTVLLVLVGQCYAKLHNYENFDLESFLSNEAKAKAFLGCVSDSKCGSQGDLEMKNDIVEMMMTSCAGCT  
EKEKEKYKEGLAVLQKSVGDPQTAMFNQFANLFLWGTDPGKKNQ

>CmedCSP8

MKTQIIFLCVLGVIALVSCAPHQSYANQPETTPEEIMRVESQLPCVLNQGPCSELGLRIKMLVPEILTTRKCSTCTP  
EENAKVGRILYIMHEKFRHHLITLNNIYGKKQSSNFHHSN

>CmedCSP2

MKTFVALFALVAVAVARPEDTYNTAYDNFNAKELVENARLLKNYKCFDQGPCTPEGADFKKTIPEALKTDCAK  
CTPKQRELIREVVSFGFQSKLPEVWAEVKKHDPEGAYKESFEAFLHAKN

>CmedCSP1

MKSFVFFFLSALMVAAMAADYNDLKDVNLEELLSDEARRKQIFDCVMDLGPGEYQIYKDVVPGVIATQCGDC  
TPELKKKYEENSKFLEKYPKEFTAVVEKYGPKEE

>CmedCSP3

MPPAYFCTLVMVTMVTADFYNPKYDDFDIQPLENDRILVGYTKCFDQGPCTPEAKDFKKVIPEALQTCGKCS  
PKQRQLIKMVIKAMMERHPDSWEVLVDKYDKDKKYRDNFNKFIESDDK

>DhouCSP12

MKIFLLCLLAVGYSHATETYTTENDDLIDRLVNNNDEFSLFIRCFLDMQECNSVAADFKKDLPEAVQTACLKCT  
QAQKHIFNKFLAGLKEKLPKEYEFSNKFDPQGIYFGPLEK

>DhouCSP10

MKTFDIIMLSIVSLVIADFYSRYDDFDIQPLENDRILLGYVKCFLEDEGPCTPEAKDFKKVIPEALQTTGKCTLKQ  
KELIRTVIRAIIQDHPESWEQLIDKFDKEKMYRDAFNKFLADKNE

>DhouCSP6

MKGIIFLSCLLAVVVSGKYTDKYDNFDYKEVVENEKLFQAYLKCFDIPGCTPEGKEVRSHLEEALQNGCECTEK

QKEGIEYCIRYMIIEKKPEQWKSCLCDKFDPTGKYKKQYEKEAEQRGIKIP

>DhouCSP2

MRVLVVLAYLVAATYAAEKYNSKYDNFDVETLIQNERLLKAYINCFLDKGRCTAEGADFKKALPEAVETTCAKCTD  
KQKTNIRKVIQEKHPKYWDELVSKNDPTGKYRVNFDKFIQGS

>DhouCSP14

MNSIIILSCLLAVVACEQYTDKYDNTNLEEIMENDNLRQAYLKLLEEGPCTAEGKKLCELLTEALETECSKCTDKQ  
KQGAKYCIKFLIKNSPKWEKLSKKYDPNGKYQAKYEKLAKEEDVELPK

>DhouCSP7

MKTIVIVCLCVLVAVTVARPGDHYTDKYDKINPEILNRRLLIPYILCILDKGKCTAEGKELKSHIREAIVEDCAKCT  
NTQRSATETVIAHLVNYEPEYWNELKGFDPSTGIYTKNHEADLRKKAH

>DhouCSP11

MKVFLITLCLAFAMAEDKYESVNDDFDINKVLKNDRLLSYVKCLLDKGPCTPEVKQVKDKLPEALATHCAKCT  
DKQKQMGKQLAQEVKNNRPELWQELVHKYDPKGGKHQFAKDFDES

>DhouCSP3

MQTSRIVFACVVLAVCAAEQTPRPEVSDTALDDALSDKRFIQRQLKCALGEGPCDPIGKRLKTLAPLVLRGACPO  
CSPQETKQIQKTLQSYVQRNYPQQWAKIVRQYAG

>DhouCSP9

MKWYILSAILALTLVAAEQYTDYDSMNVDAILANRLLIPYIKCVLGGGRCTPEGKELKAHIKDAMQSACEKC  
TDKQKVYAKKVVKHIKAQEAQYWQDLKKYYDPKNEYQHTYEGFLASED

>DhouCSP5

MRGVFLLCLCAYVVGQNVDDMVDMPKYDQRYDYLDVDAVFTNKRLVRNYVNCCLINAQRCSPEGKQLKRILPE  
ALRTKCVRCTDRQKKTAVKIMIRRLKYEYPEEWMKLSRWDPDTGDFTRYFEEFLAKENSNIIPGSGSELPSVAPA  
PSEEVSTPEQDKSAEMPVVVPLSIPSMPISPNRFSDGELMLGSSSSASGSSRPTTVKPVTIKQVMPTRPTMWT  
STDINTMPTRFTLGSSTELQPLSTAITFIDQIGYKIIRTELVTDILKNTVRAVVG

>DhouCSP4

MKTLIILFALAAIAYARPEEYSTQYDDFDVDELVNNIRLLKNYGKCFLSQGPCTPEGNDFKTIPDAVKTCKVKCS  
PKQKVLIRKVVRAFQDELPEIWSSELVQQEDPKGLYKTEFENFLNGTD

>DhouCSP1

MKLLLVTVISFCSFAINGEEKYDKKYDNINIDEILDNRLLVAYIKCILEKGKCTAEGYELKSHITDALQTGCKKCTK  
QQRDGIRKVVISHMINHEPEYWGQMVVDKYDAERIYTHRYEKELKTIH

>DhouCSP16

MQRPIFLCLSAAILIALIPSMGLGAPQMSDAQLEQALADSATIERHIKCALGEGPCDVTGRRRLTLAPLVLRGACPO  
CTVQETRQIRRTLAFVQRNYPWEWAKIVRQYG

>DhouCSP13

MNFIITSFVIFQIFIINGEETSYTNEFDGLDLHEILTNNRLLTAYVNCLENGPCTPDGKELKKNLPDAIDNGCKKCT  
QKQREGADEVMHYIIDNRPEDWTKLEDKYHSDGTYKRKYLASKQVMGEPQDNNSTQNAAT

>DhouCSP17

MKSFIIILSCVVVLAFAQKYSGLDSVDIKELFENDSMKTNIFNCFTEKGTCAPEFQEIKDLLNPNSTIDNLSAQL  
EKFKDAAKYMHEKYRSVYDELAAKNDPTGQWRKKGYP

>DhouCSP8

MKGIIAVCVLSLAALVLSDCPDGLYTDYDNTNVEEIMTNDRLMPYVSCMLDKGKCTPEGKELKNHIAHALQN  
GCECCTDDQKTKSRVVIGHFINEKPDVWDELTAKYDPKLFSSKYYEELRKLKA

>DkikCSP7

MKTLIILFALAAIAYARPEEYSTQYDDFDVDELVNNVRLKNYGKCFLNQGPCTPEGNDFKKVIPDAVKTCKVKC



SPKQKVLIRKVVRGFQEELPEIWSELVQQEDPKGLYKTEFENFLNGTD

>DkikCSP12

MKSIILSCLLAVVACEQYTDKYDNTNLEEIMENDNLRQAYLKCLLEEGPCTAEGKCLKELLTEALETECSKCTDKQ  
KQGAKYCIKYLKNSPKWEKLSKKYDPNGKYQAKYEKLAKEEDVELPK

>DkikCSP1

MRVLVVLACLVAATFAAEKYNSKYDNFVETLIQNERLLKAYINCFLDKGRCTAEGADFKKALPEAVETTCAKCTD  
KQKTNIRKVIRAIQQKHPKYWDELVAKNDPGSKYRVNFDKFIQGS

>DkikCSP11

MRGLYLLCLCAYAVGQNMDDIVNMPKYDQRYDYLDVDAVFTNKRLLVRNYINCLINAQRCSPEGKQLKRILPEAL  
RTKCVRCTDRQKKTAVKMIIRRLKYEPEEWMKLSRWDPTGDFTRYFEEFLAKENSNIIPGSGSEFPSSVAPAAS  
EEQPSTAEQDQAAEMPIVVPLSIPSKPISPNRFDNGELVLGSSSSASGSSRPATVKPATVNQVVPTRPTMWTNT  
DINTMPTRFTLGSSTELQPLSTAITFIDQIGYKIIRTELVTDLKNTVRAVVG

>DkikCSP2

MKVFLITLCLAFAMAEDKYESVNDDFDINEVLKNDRLLSYIKCLLDKGPCTPEVKQVKDKLPEALATHCAKCT  
DKQKQMGKQLAQEVKNNRPELWQELVHKYDPNGQHQAFAKDFEFES

>DkikCSP17

MQRPIFLCLSAAILIALIPSLMGAPQMSDAQLEQALADSATMERHIKCALGEGPCDAVGRRLRTLAPLVLRGACP  
QCTVQETRQIRRTLAFVQRNYPWEWAKIVRQYG

>DkikCSP9

MKTFCIIISIVSLVIADFYSRPRYDDFDIQPLENDRILLGYVKCFLDEGPCTPEAKDFKKVIPEALQTTGCKCTSKQK  
ELIRTVIRAIQDHPESWEQLIDKFDKEKKYKDAFDKFLADKNE

>DkikCSP15

MQTSRIVFACVVLAVCAAQEQRPEVSDTALDDALSDKRFIQRQLKCALGEGPCDPIGKRLKTLAPLVLRGACPQ  
CSPQETKQIQKTLVYVQRNYPQQWAKIVRQYAG

>DkikCSP16

MKFVVMVVIAMAAARPGNPNYEKFDNLDVDEVLGNSKLTSSLLKCMVDDGRCTPEGTDLKNLAPGAVQNKCA  
DCTAEQKTKAAKFMRAAKKDYTELFNKLVIHDPNNEHTAELDEFQNTQ

>DkikCSP13

MNFIIITSFVIFQIFIINGEETPYTNEFDGLDLHEILTNDRLLTAYVNCLENGPCTPDGKELKKNLPDAIDNGCKKCT  
QQQREGADEVMHYIIDNRPEDWTKLEDKYHSDGSYKRKYLASTQVMGEPQDNNSTQNTAI

>DkikCSP6

MKGIIAVCVLSLAAVVLSDCPDGLYTDRTYDNTVDEIVSNDRLMTPYVSCLEKGNCTPEGKELKNHIAHALQTG  
CECCTNQQKSKSRVIGHFINEKPDVWNELAAYDPKKVYTKKYEELRKLKS

>DkikCSP4

MKGIIFLGCLLAVVVSQKYTEKYDNVDYKEIMQNPCLFHPYFKCVLDQGSCTAEGKELKAHISEALENGCEQCTE  
KQKEGIDYCIYLIENYPEQWKSCLDKFDPTGKYKKQYEEEAQKRGKIP

>DkikCSP3

MKLVLCIAFTYLVAVWCKPSSTYTDKWDHINVEEILESQRLLKAYVHCLLGLCTPDGKALKETLPDALEHECS  
KCTAKQKSSSDTVIRFLVKNRPDLWKELSHKYDPDNIYQERYKDKIDSVKGS

>DkikCSP10

MKILLCLLTVGYAHATETYTTENDDLIDRLVNNDDQFLSFIRCFDKQECNSVAADFCKDLPEAVQTACLKCTQ  
AQKHIFNKFLAGLKEKLPKEYEFTNKFDPPQGIYFGPLEKAVASS

>DkikCSP5

MKSIVVCLCVLAVTIARPGDHYTDKYDNINPEILNRRLLIPYILCILDKGGKCTAEGKELKSHIREAIVEDCAKCTD

TQRSGTETVIAHLVNYEPEYWNELKGFDPGSIYTKNHEADLKKLKAH  
>DkikCSP8  
MKWYILSAILALTTLVAAEQYTDYDSINVDEILANRKLIPYMKCVLDQGRCTPEGKELKAHIK DAMQTACEKCT  
AKQKVYAKKVVKHKAQEAQYWQDLKKYYDPKNEYQQTYEGFLASED  
>PrapCSP  
MAGKLIVIFCVLVAVFAEKYTDKYDNINLQEILDNKRLLHAYVDCLLDKGCSPGKELRDHIQDALETGCSKCTE  
AQEKGYTIIIEHLINKEKEIWEKLCAYDAEGKYRKKYEERAKSAGLAV  
>PaegCSP  
MQSIVILMTLLSMALAIQSQTYPDYDNFNAEDLVENVRLRSYGKCFLEKGPCTAEGSDIKKIPEALRTSCAKCT  
PKQQQLVRTVARAFQSKLPDLWKELVLKEDPKGEFREAFTQFLDNSDITALKMKH  
>SnonCSP1  
MMKFVLLLCVMVAAMAEKYTDKYDNIDLDEILSNKRLLMAYVNCVLDKGCSPGKELKDHLSDAIETGCTK  
CTDAQQKGYRVIIEHLIKNELDIWRELCAKYDPTGTWRKKYEDRAKANGIVIPE  
>SnonCSP2  
MKVVLLALCLALGVLAQDKYESANDDFNIKEVLENDRLLTAYSKCLLGTGPCTPEVKQVKDKLPEALETRCAKCT  
DKQKEMGKTLAQEVKKNHPDIWKQLVAKYDPQGYQQAWKDFLQE  
>SnonCSP3  
MRVLIVLACLIVMAFAADKYNSKYDNFDVETLISNDRLLKAYINCFLDKGRCTPEGSDFKKTLPEAIETTCACKTEK  
QKTNIRKVIKAIQQKHPKEWDDLKKNVPSGKNXANFDKFIQGSS  
>SnonCSP4  
MYSALATMLLIYLTIQSNATETSTYTTKYDGIDLDEILNERNLLNGYVNCMLDLGPCTADGKELKKNIPDAIENDC  
KKCTDRQRDGS DRVMHYLIDHRPDDWVKLEKKYNSDGSYKLYLSSKTTEDNSVTNVSKSEEDTKNDSKE  
>SnonCSP5  
MNSFIILCLFGLVVAVARPDTTYTDKYDSVNLDEILGNRRLLTPYLKCMLDQGKCTPDGKELKSHIREALEEDCA  
KCTKTQRDGRTRVLGHLINHEKDYWNQLKAKYDQSYXSSKXEEELRTLKQ  
>SnonCSP6  
MNFLVLSIVVTLAAFAATETYTDYDHINIDEIENRKL LVPYIKCTLEQGRCTPEGKELKAHIK DAMQTACSKCTEK  
QKKGARKVVKHIKAKEQDYWKQIIAKYDPENQYSETYEAF LAEKE  
>SnonCSP7  
MQFKYAILCCVAVVSVAQTQRPAVSDTALEDALQDKRFIQRQLKCALGEAPCDPIGKRLKTLAPLVLRGACPQC  
TPQETKQIQRTLSYVQRNFPQT VGGQNSPPIRGIIYKVKVSCIGNMIG  
>SnonCSP8  
MKSIVLVCVLSVAVMALARPEDAQYTDYDNVNLDEVLSNRLLVYPVKCVLDEGKCAPDAKELKEHIREALEN  
KCAKCNEAQKGRTRRIGHLINHEADYWNQLTAKYDPERKFTAKYEKELKEITA  
>SnonCSP9  
MKAVICLCALVVAVARPEEQYTSKYDGTNIPEVLANERLLHSYIKGLDLGKCTTEGKELKSHLKEALETHCAKCT  
DKQKEATRLVIKHLINNEADYWKQLSDKYDPEGKYAXKYEDELKTVS  
>SnonCSP10  
MPKYDQRYDYLDVDAIFTNKRLVRNYVDCLINSVRCTPEGKALKRILPEALRTKIRCTERQKRAAVKVIRRLKYE  
YPDEWSKLASRWDPDTGDFTRYFEEFLAKEHFNTIPGSGSAIPTSAPLPPRNPTMPPTIASPAGPTVPTPPKPAI  
NRFGDDGELMQGSSSVGMTPRPMTQATTRPTTMMKPANTKPIPRPTMTTWAGAASNTQPTRFPLRPSSD  
LPPPYFHSNTH  
>SnonCSP11  
MKLLIVLALVAVASPDGDHYDSKYDSFNVDELIQSPRLLKSYAHCFIGDGKCTPEGKEFKGWIP EATTSSCGKC

TEKQKVLVAKFIKAIKEKFPEEY GALVKKSDPEGTHGGDLQKFIDKYGS

>SnonCSP12

MKFVCIVLLLAVIAVQAQYSTENDNLDIDALVANEESFKSYLGCFLDRVTCDAVPAEFK DIPDAVKTTCSKCTDA  
QKQIFHKFLLGLKEKLPSDY EAFKNKYDPGNEYFTALEAAVANS

>SnonCSP13

MKADCVFLATLSVMVAADFYDSKYDSFDVQPLENDRILLGYSKCFLDQGPCTPDAKDFKKVIPEALETTGKCS  
PKQKQLIKSVIKAVIDRHPDTWEQLSEKYDKDRKFESFDKFLAEED

>SnonCSP14

MKLIIAVALLCMVAMSWGQRTSTYTDKWDNINVDEILESERLMKAYVDCLDRGRCTPDGKALKETLPDALEN  
ECSKCTAKQKTGSDKVIRHLVNRPELWRELSTKYDPDHIYQDKYKTQIESVKQ

>SnonCSP15

MINLNKCSFRGSLILTYLFLVTVLAQDKFYDRRYDYEIDTLIQNRLLRKYLECFLWKGPCPTIGRVFRQILPEAVS  
TACKKCTXSQRRLARKAFNAFRKYFPEXYVELMKRLDPKNKYEAFEKAIXNA

>SnonCSP17

MKNWLLCLCVLTVVSCYSQGANRYENFNADAIQNDRILLAYKCVMDKGPCTRDGKNFKRVL PETLSTACGR  
CNPTQKAIVRTLLLGIKSKSEPRFMELLDKYNPDRSNRDALYNFLVTGN

>SnonCSP18

MNALLIAVFALVAPSALAYDEIYDKIDVDKILGDDALFTTYINCMLDKGECTVEHSADFKLLPEVIATSCGKCSPI  
QRQNVKRKTVKALSEKKPEEFTQFRAKYDPKGEHEKSFSFAFVMGTD

>SnonCSP19

MKTILALCLLVAVCAKPEATYDSRYDNFDVESLVGNTRLLKSYGHCFLGTGHCTAEGSAFKKQIPDALRTGCSKC  
SPKQRHLIRVVVKGFTKTPDIWNQLVKKEDPTGEYKESFTKFLNSSD

>MsexCSP1

MKCICLLFLVVAVYAEKYTEENDDLDIEGVIKDADTMKAFTGCFMDTADCDHVSGDFKKDLPEAIQTACA KC  
TDKQKHITKRYFEGLEEKYPELYQAFKNKYDPENKYFAALKAAIAKF

>MsexCSP4

MQVTYVLLVCVVVASCVAQQAQRQVTDTALEDALNDKRFIQRQLKCALGEAPCDPIGKRLKTLAPLVLRGACP  
QCSPQETKQIQRTLSYVQRNYPQQWAKIVRQYAG

>MsexCSP13

MRTVIVLTFVAACFAAEKYNPKYDNFDVDTLISNERLLKAYINCFLDKGRCTPEGTDFFKKALPEAVETTC AKCTEK  
QKVNIRKVIKAIQQKYPKQWEELVKKNDPSGKHRANFDKFIQGS

**Supplementary Table 6.**

| <b>Gene</b>    | <b>Forward primers (5'-3')</b> | <b>Reverse primers (5'-3')</b> |
|----------------|--------------------------------|--------------------------------|
| <i>PBP1</i>    | AAACTGAGCTTAACGTGGGC           | TCGTGGATCTTAGTGC GGAA          |
| <i>PBP2</i>    | GCGTTCTGTCCATCGGTTAC           | TTCATGGCAAATTCCTGGGC           |
| <i>PBP3</i>    | CGCCTCAGGATTCGTGAAAG           | TTAGCTCGTGGATACCGGTC           |
| <i>GOBP1</i>   | ACTGACGGAGGAGAAGATGG           | AGCCTCCATGATGAACTCGG           |
| <i>GOBP2</i>   | GTGCAGAGAAGAGTCAGGGT           | ATCATTGCGACTTCTGGTGC           |
| <i>OBP1</i>    | GCTTACATCAGTACCACGCC           | ACGCAGCATCAAACATCGTT           |
| <i>OBP2</i>    | ACAGAAGAACAAGTTGGGAGAA         | TCATACAAACATTTTCGATGCGT        |
| <i>OBP3</i>    | AGAGATGGACGAGGACATGG           | TAGTCCGCCTTGTTAGCGTT           |
| <i>OBP4</i>    | CTGTTTGCCATCGTCCTCAC           | TTTCCATTGCGTTCTCCAGC           |
| <i>OBP5</i>    | GTTCCCTCGTTATTGGTGGCG          | AACTTCATAGCCGGCTCACT           |
| <i>OBP6</i>    | TGGTTTTGTGTGTTGTGGCT           | TTTTCGTTGACTGAAGCGCA           |
| <i>OBP7</i>    | TCTGGAAGTGATGCCATGTCT          | CTGGCTTAAACTCGTACATGCA         |
| <i>OBP8</i>    | AGTTGCAACGTGTGAAGCTA           | ACATGAAATGACGCATCGCA           |
| <i>OBP9</i>    | ATGTGCCTCGTCAAGTACCATG         | CGACCTCGGTCCCAGTCATT           |
| <i>OBP10</i>   | GATTCCGAGTCAAGATGCCG           | GGTACACACACTGCAGCAA            |
| <i>OBP11</i>   | GTGTTCGTGGTTGGGGTTTG           | TGTCTCCACGGCATCTTTTC           |
| <i>OBP12</i>   | ATGAAGACTCTGTTTGTTCGCT         | TTACAAAAAATCGCATGCTTG          |
| <i>OBP13</i>   | GATAACATCATGTTTATTAGTACTAAGTG  | TAACGAACTTCAAATCTTTTATTG       |
| <i>OBP14</i>   | GCCTTGTTTGTAGTAGCTGTGA         | GGGGCAAGTAAACTCGCATC           |
| <i>OBP15</i>   | TGGGACAGAGCGTTAAAGGT           | GGGAACATGAAATTAGCTGGGT         |
| <i>OBP16</i>   | ACCGCTTTGTGATCCTCAGT           | TTCCGTCGTCCTCCATTCA            |
| <i>OBP17</i>   | CCTTTGACTACTCTGTTGCA           | AGCATCCCTCATCTCAGCTG           |
| <i>OBP18</i>   | GTGGAGCAATAGACAAGGCG           | GTAGCAGGCGTTACAAGAGC           |
| <i>OBP19</i>   | ATGACCGAGTGCTTGAAGGA           | CATGAGGTCGTTCTGCAAT            |
| <i>OBP20</i>   | ATAACACTCTCCGGCTTCGCT          | ATGTGTGCAGTCGTTGAAGACCT        |
| <i>OBP21</i>   | TGCTGTACTCATGGCGGTA            | GGCATCGGTCTTATCTGGA            |
| <i>OBP22</i>   | ATGTGCAAGTTTACCTGCATTATCC      | TTAGAACGGCATCTCAACTTTGTG       |
| <i>OBP23</i>   | ATGGCCAAGTTCTCTTGTCTTGT        | TTAGATGATGATACTAGTCTTATGCTCCA  |
| <i>OBP24</i>   | TGTGTTTATAAAAAGACAGAATTTTG     | CACCTCTCTCGCATCCAGCC           |
| <i>OBP25</i>   | TCAAGCAGATGATGGCAAGA           | TTAATAATCAACACCAAACATATTTGG    |
| <i>OBP26</i>   | GGCCTGCATGATGAAGCAA            | GCACCATCACTGACCGATT            |
| <i>OBP27</i>   | ATGTATAAATTTGTTATTTTGTGCTCTA   | CTAGCACTTCCACGCTGTGTC          |
| <i>OBP28</i>   | ATGATCGTTTCGGTTTTTATTATGTTT    | TTATGGTAATTTTATTCCCAGCTGAG     |
| <i>OBP29</i>   | GCTCAAGATGGAGTTCACAAAGTTA      | GGGTGCATTTTCAACTGTGC           |
| <i>OBP30</i>   | TCTAAAGCAGAAGTATGTGGACA        | CTGGTCGTTTCATCATTCCCG          |
| <i>OBP31</i>   | CGAACACCGCGAGAAAGAAA           | AGCTCTATTAGCTTCTAATAAATGTT     |
| <i>OBP32</i>   | CGAATTGATAGGAATGATATACCTTGTA   | CTATTTCCATTCATCGGGATCTCT       |
| <i>OBP33</i>   | CTGGGTAAGGAGGAGAAGGC           | CGCCTTCTGTGATAGCCAC            |
| <i>β-actin</i> | CGAGAAATCGTGCGTGACAT           | ATCTGCTGGAAGGTGCGAGAG          |

**Supplementary Table 7.**

| <b>Gene</b>                     | <b>Forward primers (5'-3')</b> | <b>Reverse primers (5'-3')</b> |
|---------------------------------|--------------------------------|--------------------------------|
| <i>PBP1</i>                     | AAGATGACCAAGGGATTC             | CGCCAGTAGTTATACATG             |
| <i>PBP2</i>                     | CGAAACCTTTGGATGATT             | TCCAGAAGTTGTAGAAAGT            |
| <i>PBP3</i>                     | TACATCGCCTCAGGATTC             | TGGAACAGGTCTGCTATG             |
| <i>GOBP1</i>                    | GCCAGGAGAGTCAACTGA             | CGGTGCTCGAACTTGAAG             |
| <i>GOBP2</i>                    | ATGTCACCGCCATTTTCG             | GGAACTCCTCTAACACCTCTG          |
| <i>OBP1</i>                     | CAACTGATGACGACTATA             | TGCTGGTATTATTCTTGT             |
| <i>OBP2</i>                     | CTCAGTAACAGAAGAACAAGT          | GCAAGCGACATAACACAT             |
| <i>OBP3</i>                     | GCTCAAGTGCTACATCAAGT           | TACAGCCTCGATGTCCAC             |
| <i>OBP4</i>                     | AGTTCAATCCAGCGAGAG             | ATGTCAGCGATGTCTTCC             |
| <i>OBP5</i>                     | CGGTGTTCTCGTTATTG              | ATACCTGCCTCTTCATCTC            |
| <i>OBP6</i>                     | ATGGCATCAACTCCTGTT             | TATCGGCGTCGTATTCTC             |
| <i>OBP7</i>                     | CTATGAATTGACGAATGTGATAA        | CGCAGATGTCCTTGTATT             |
| <i>OBP8</i>                     | TTGCGGATGCCATAAAG              | TACCAGGATTGTGATTGTAGATG        |
| <i>OBP9</i>                     | CAATCCGAACAACCACAA             | GTAACGCACACGACTTAT             |
| <i>OBP10</i>                    | GATTACTCTGTGTCAGGATG           | ATCGTGTGCTCTTCTTTG             |
| <i>OBP11</i>                    | AATAGAGATGTAGCCATT             | GTTGATAGCATTGAAGA              |
| <i>OBP12</i>                    | CGCACTGAATGTCTAACT             | GCCTCATTGTCCATCTTAT            |
| <i>OBP13</i>                    | ATTCTTACACTGTATCCA             | ATTACGCAATATCCTTCTT            |
| <i>OBP14</i>                    | GAGCCTTAGTAGTGTTCA             | AATTGTTCTTCAGAGATGTC           |
| <i>OBP15</i>                    | GATATGAAGGCACCAGTTA            | TCGCTGTCCAATAAGATG             |
| <i>OBP16</i>                    | CTTAACAACACTACGGACCA           | TCACTCCATTCAGAACAG             |
| <i>OBP17</i>                    | AAGTGGTGAAGAATAACAA            | ATCGTAGTCGTACATACA             |
| <i>OBP18</i>                    | AATAGTAGTCTTGGAACC             | GGCACCTGTATATGTTATC            |
| <i>OBP19</i>                    | ACTGGTCCTATGCGAATT             | GAACTTCCTTCAAGCACTC            |
| <i>OBP20</i>                    | AATCCAGGAATCAGATGAAC           | TCTAGTTGGTGAGCGATT             |
| <i>OBP21</i>                    | GAGGAGGATATAACGAAT             | AATCCACTGTATCATCAT             |
| <i>OBP22</i>                    | AAACTGGACTTGGTAAACTAA          | CGTCGCTTACAGATTTCAT            |
| <i>OBP23</i>                    | AACTGGATTGAAGAACCT             | ATCACTCACTGCCTTATC             |
| <i>OBP24</i>                    | TAGCAATGATGATGATTAC            | GTTAGTAGTACACCTCTC             |
| <i>OBP25</i>                    | TGTAGTAGGTGTGAGTCT             | AGTCGTCTATGATCTGATTC           |
| <i>OBP26</i>                    | AATTGGTGTTATGGATGAC            | GATTGCCCTCAGTTCTTC             |
| <i>OBP27</i>                    | GACTGATTCCATTTACAAA            | TTCTTCAACATAGCGATA             |
| <i>OBP28</i>                    | ACTCAATAGCAATGACACAA           | CTTCGTCGTTCACTTTCT             |
| <i>OBP29</i>                    | TGTGTATGCTCGAAGAAG             | ACCTCTCCATCCTTGTTA             |
| <i>OBP30</i>                    | GTGGACAACATATTAGAATG           | TATAAACACAGGCAAACA             |
| <i>OBP31</i>                    | TTGTACTGTTCTCATTCG             | GTTCTCTGTATCTTGTT              |
| <i>OBP32</i>                    | CCTGTGCTCAGAACATTA             | GTAGGACACTGCGTATAG             |
| <i>OBP33</i>                    | CTGGGTAAGGAGGAGAAGGC           | CGCCTTCTTGTATAGCCAC            |
| <i><math>\beta</math>-actin</i> | CATCCGTAAGGACTTGTA             | TGATCTTGATCTTCATTGTG           |
| <i>RL-31</i>                    | AAGTTGTAACCTCGTGAATAC          | GTTCCCATTTGTTTCTCAG            |

**Supplementary Table 8.**

>BmorGOBP1

MWKLVVVLTVNLLQGALTDVYVMKDVTLGFGQALEQCREESQLTEEKMEEFFHFWNDDFKFEHRELGCAIQC  
MSRHFNLLTDSSRMHHENTDKFIKSPNGEILSQKIDMIHTCEKKFDSEPDHCWRILRVAECFKDACNKSGLA  
PSMELILAEFIMSEADK

>BmorGOBP2

MFSFLILVVASVADSVIGTAEVMSHVTAHFGKTLLEECREESGLSVDILDEFKHFWSDDFDVHRELGCAIICMS  
NKFSLMDDDVRMHVNMDEYIKGFPNGQVLAEKMVKLIHNCEKQFDTETDDCTR/VKVAACFKKDSRKEGI  
APEVAMIEAVIEKY

>BmorPBP1

MSIQGQIALALMVYMAVGSVDASQEVMMKNLSLNFQKALDECKKEMTLTDAINEDFYNFWKEGYEIKNRETGC  
AIMCLSTKLNMLDPEGNLHHGNAMEFAKKHGADETM/AQQLIDIVHGCEKSTPANDDKCIWTLGVATCFKAEI  
HKLNWAPSM/VAVGEILAEV

>BmorPBP2

MKLQVVVLTVEMVCGSRDVMNLSIQFAKPLEACKKEMGLTETVLKDFYNFWIEDYFTDRNTGCAILCMS  
KKLELMDGDYNLHHGKAHEFARKHGADETM/AKQLVDLIHGCSQSVATMPDECERTLKVAKCFIAEIHKLKWAP  
DVELLA/EVLNEVSWKS

>BmorPBP3

MARYNIVVAVLVGVVARGSSSEAMRHIATGFIRVLDECKQELGLTDHILDMYHFWKLDYSMMTRETGCAIIC  
MSKKLDLIDGDGKLHHGNAQAYALKHGAATEVA/KLVEVIHGCEKLHESIDDQCSR/VLEVAKCFRTGVHELHW  
APKLDVIVGEVMTEI

>BmorOBP5

MKQRLRVLLLRFILQTVLSESGVDVVKNLSL/SFARFFLECDEERHFQPEVRLKVMTFWYSESSTWDRDVGCAF  
LCIFKKMEIDNPQDPSYRTHLELLSFANSE/DNKIANQMVEIFYACGENTETDPCLWALEQVKCYKNRINQLGLTP  
TF

>BmorOBP7

AVTEELKIEFTKLVMKCTKDHPVDMSELMQLQQLIAPKKTESKLLACAYKLN/VMTSQQGLYNLEHAYKIAEM  
SKNGDEKRLKNGK/VADICVKVNDVEVSDGEGK/CERAALIFKCTLENAPKVF/KFGSSEYN/CQ

>BmorOBP8

MLRVVVICVCF/LVIAPYGINASSLDD/LKMVYKNVIK/ECVGDYPITAADL/KLIKARQIPND/DIKCVFACAYKKTGM  
MTEEGML/SVEGIK/DMSQKYLS/DNPEQLRKSKEFAEACSSVND/QQVSDGT/KGCERAALIFK/CKSTEKITNFGFEL

>BmorOBP9

MLRVVVICVCF/LVVAPYGINAVS/EQKIKIRDQLDRAGFECFKD/HKITEDDIK/NLRANKPATGEN/VPCFIACVMKK  
TGVMNDQGVIRKGPVLELAKK/VLADDDK/DIKLQDYI/HSCSHVNS/ETVHDKGKGCEFAMQAYTCMSANASKFG  
FNI

>BmorOBP10

MLRVVVICVCF/LVIAPYGINAVS/DEQKIKIREQIDKSGFECFKD/HKITEDDIK/NLRANKPATGEN/VPCFIACVMKKT  
GVMNDQGV/IHTEPVLQ/LAKKVLTD/DKDIK/LQDYI/HSCSHVNS/KTVHDKGQ/GCEFAIQTYTCMSANASKFGFD  
V

>BmorOBP11

MSANSFVV/LAFCALAVGVNALTEEQKAEITKSS/LPIAEC/SKEFSVN/QGDIDA/AAK/LGDP/SGLNSCFV/GCFMKKA  
GIINASGLFDVAATIEKSKKYL/SEEDLKA/FEKLTET/CAPENDK/PVSDS/DKGCERAK/LLLD/CFVANKGSF/SFVSL

>BmorOBP12

MTSFMVFFVLSVLTLYSDALTDEQKNKIQSKFIEIGAECIVEHPISIDDINSFKNKKFSPSGVNAGCFVACIFNKIGL  
FDDKGNLSHNSALEKAKGIFNADEEVKNLEEFNRCQAVNGEAVGDGVKGCERAKLAYNCLIENSLEFGFNIDF  
>BmorOBP13

MLKIHVLLCFGMAILYFGSAKAVTPEESKAFAFAKPVIEQCQKDFGMDKESFAQKNLDEIDECLIACVVEKFGIT  
NDEKIDGDALKALVTKFVGNNEERNKINKIVEECTEDANKSGDGT CNTSTILFLCLLNGKDLWGF

>BmorOBP14

MSRQQLKNSGKMLKKQCMGKNDVTEEEIGDIEKGFIEQKNVMCIACIYQMTQIIKNNKISYEASIKQIDLMI  
PPELKESAKASAGRCKDVSCKYKDICEASYWTAKCMYEDNPKDFIFA

>BmorOBP15

MFLKNIFIECVLLYFVMLNTSFVNTMTKQKIKNSGKILKKACISKNDVTEQISDIDKGFIEDKNVMCIACVYS  
MSQVVKNNKFVHDAMVKQVDMMFPTMRDAVKASIANCRGVAKNYKDICEASFWTAKCMYEFDPANFVFA

>BmorOBP16

MRIISFLISVITITFDSVFAMTRAQVKKMTIMKNQCMPKNGVTEQVQKIEEGIFLENHNVMCYIACVYKTI  
QVVKNDRDKDLISKQIDVLPQEIRESTKKA VGDCINLQEKYDDWCEGIFRSTKCLYEKDPANFIFP

>BmorOBP17

MTRQQLKNSGKIMKKT CMPKNDVTEEEIGQIEQGFLEQRNVMCYIACIYTVTQVVKNNKLSYDAVIKQVDV  
MFPAEMRPAVKA AENCKDISKTFKDICEASYWTAKCMYDFDPKNFVFP

>BmorOBP18

MILIVIAKFLILISLCETMTMKQIKNTGKMMRKSCQPKNNVDDEKINPINDGVFIEENEVKYIACIMKMANTM  
KNGKLNFEAAMKQADLLLPDEMKEPTKEAIVACRQVADSYKDVCDASFHVTKCIYNHNPSVFFFP

>BmorOBP19

MTSAKTDVEIKAWFLGQAVECSKDHPVTTEELRMHKHELPSKNAKCLMKCVFRKCNWLD SKGMYDINAAY  
ASSTKDFSDDKTKQENANKLFD TCKSVNEENVGDGEEGCDRSLLLAKCLTAA PQVSIYYS

>BmorOBP20

MAVHIFLILASYMALAAHGQLDDEIAELAAMVRENCADESSVDLNLVEKVNAGTDLATITDGKLCYIKCTMET  
AGMMSDGVVDVEAVLSLLPDSLKTNEASLKKCDTQKGSDDCDTAYLTQICWQAANKADYFLI

>BmorOBP21

MITASLHVIFALLAFVYGGKDKPVLSEEIKEI IQTVHDECVGKTVSEEDITNCESGIFKEDVKLKYMFCLLEEAGL  
VNDDGTVDYEMFTSLIPEEYFDRATKMIFSKELDTPDKDKCERAFEVHKCSYEKDPDFYFLF

>BmorOBP22

MLKV FVVVVCTLGASQLCAALYTQKVAVSFPKDKTTIVVEAMKSCIAKTGANPNVIEVISSGKVSSEDEKFEFFYC  
ACNDIGVVNPDGHIVKECIELFPKETQPLVEPVIKNCDKEGVNKYDTLFKYLKCFQETSPVRVTLA

>BmorOBP23

MTSKVLLSCVVLAVLATTVLAEDSRKLVSAPEVAKLLKVLIQECLNENGLGEDAIEVIRAGEYREDEPFQNLVYCA  
YKKFGALDENNRISQVAAASFPKDIDVVTVIESCGKEDGNTPVEQVFKYFKCFQKNSPVRMQLY

>BmorOBP25

MKSVVLI CLAFVFNCGADNVHLNEDEREKANWYTAECGVETGVSTEVINA AKIGKYSKDKAFK FVLCFFKKS  
AILNSDGT LNMVVALAKLPSGVNKSEAQSVLEQCKNKTGQDAADKAFAILQCFHKGTKTHILF

>BmorOBP26

MKSVVLI CLAFVFNCGADNVHLAETQKEKAKQYTSECVRESGVSTEAINAAKIGKYSKDKAFKNFVLCFFNKSA  
IFNSDGT LNMVVALAKLPPGVNKSEAQSVLQCKNKTGQGAADKAFEIFRCYKGT KTHILF

>BmorOBP27

MKSVVLI CLAFVFNCGADNVHLTETQKEKAKQYTSECVKESGVSTEVINA AKTGQYSEDKAFK FVLCFFNKSA

ILNSDGTLNMDVALAKLPPGVNKSEAQSVLEQCKDKTGQDAADKAFEIFQCYYKGTKTHILF

>BmorOBP28

MLKVFIVTFFAFQLSAIARLQANGCVAVPFPKDKTIIIVEAMKSCIAKTGANPNFIDVIRSGKVSSEDEKFKEFYYCT  
CNDTGFVNPDPGHKVKECIELFPKETQPLVEPVIKNCDKEEGVNKYDTLFLKFLKCFQETSPVRVALA

>BmorOBP29

MTGPAAAAVLLALLAAAGQATTGCKNCVILGKEERAMFRSHSDACLAQSRVEPRLLESMMNGELIDDAALRK  
HVYCVLLSCKMIGKDGKLLKAAILGKLAARPAGRDTVTKVLEACAEQPGASPEDVAWNIFRCGYNRKAVLFDYM  
PAGGASSGNTENHP

>BmorOBP30

MRSFVILLNYGLCCGQFMAEDYDYDIVTRDPDDLREKENEVRALRAFQADCAEDVQVKPDLVNLKSGDW  
QTEDVSLKKWALCVLMKLGMLTAQGVFKMNEAMSKIPDMNDKIIAEKLIDDCLSLQATTPHDAAWNLIKCHH  
QKDPEGNFSSLNIF

>BmorOBP31

MKTFIVFVVCVLAQALTDEQKENLKKHRADCLSETKADEQLVNLKKTGDFKTENEPLKYYALCMLIKSQLMTK  
DGKFKKDALAKVPNAEDKLVKVEKLIDACLANKGNSPHQTAWNVVKCYHEKDPKHALFL

>BmorOBP32

MYSHKYLNDFTNIPEIILLLSSVALMSYGYNTKLFHSLGSEPSLSILYARDKKSVDKVTNECLMEMYPKNLYKYPLR  
IDRNDIPCIHCVLKKFGIISNDGFINIKNYRRVQAIHRYDPRILISDVGETCAQNINGMNLHDVCKKAKVFND  
CTQLYAI SYREPEDW

>BmorOBP33

MYAHDKLSDMIADQCLNEMYPRSKRLEIEESDEPCIIFCVLKKFGIMSPTGVINLEAYRKRVLPEQLAQRNSIN  
DFGSACLES AEATQHKQDVCKKAKVFNECTHLYKILLK

>BmorOBP34

MEKMILLNVFAVVLPCVLASRTRGSSGTLVDFTDPKVQGHLDALVRMAQSCVIKVRATPKDVRAYFTNSSPVSR  
SGQCFATCMLEQSDIINHGVNRDLLVHLAGLVNGKNSRVVRKLNVSRLCLDSISGMTDRCQLASTYNDCLNE  
NMIEFAFPLDIAEEAVRKMPFHLIQPK

>BmorOBP35

GMSTHVLDFKRNMT ECLKEVQNNDRPIKRLSPKQESPIHGELIACVLKKNQVIQNGKVNKDNLMALVSKFH  
AKETKLMKKLEKNLDRGINISVKNHDECSLASQLNDCTNDIMASSKQKILFNY

>BmorOBP36

MAVSEISRLTFLTVSFIYVYSFKPLTKDEHIERYNKMNEDIEPFRKNLTECARQVKASMADVEKFLKRIPQSNME  
GKCFVACILKRNLIKNKLSQENLLEVNRAVYGGDSEVMSRLKTAILECSKIVEDIFEICEYASVFND CMHMKM  
EHILDKITMERRMEALGQMSSNPDEWSEEEDEMLKLVKDEL

>BmorOBP37

MFYPFRFTLLFYGLFVIYLVRAEPEKENHFTLALKKTLFSTARSCMSHVANANETDLEYLRKDPPFPDKAACIIKCLLE  
KIGVVKNKYSKMGFLTAVSPLVFTNKKLDHYKVSSENCEKEINHDTTECELGNEVVSCIFKYAPELHFKT

>BmorOBP38

MANLVLLLTFLVMTLSMARLKSTEAPKSKTALFNDQDNMGYEELDMEEIMSACNESFRIEYAYLES LNDSGSFP  
DETDKTPKCYIRCVLEKTEILSENGVLNPATAALVFAGERNGKPMSDL EEMAVACADRHEKCKCEKAYNFVKCL  
MYMEIDKYEKKN

>BmorOBP39

MVRKISALLCCFCVLGISMCD SAISTDNEQRCKNPPTAQQKIERVITLCQDEIKLSILREALDVIKEEHTMPAERKR  
NKREVPFTHDEKRIAGCLLQCVRKVKAVDGGFPTLEGLVGLYSDGVNERGYFMAVLEASRECLMKNHDKFS  
RTTPMDNGRNCVDFIFECISDRIGEYCGTSGL



>BmorOBP40

MSEFIQPSWRTQC�FRLNWDNRNRLSIDISHGAATTQTPVPTTKPKALRDFMVVPPQSCDKTTCVFKKLNIVSD  
KGVVDVKSFIKLLDKFTNSYPVWNSAKARVITCLRKSLIAYDGGCELNNILACTFDVLSENCPLNGNNQTC

>BmorOBP41

MLTILFLLPIVVGVLSGNIPEQPRVYCGELPNTIYSLGNPKIIQPEVSEKCNKPISECDKTRCIFKESGWAKNNVID  
KKKVSDYFEQFAKDNPDWSAAVQNFKTTCLSDSLKPPQGVDTNCPAYDIIHCALISFIKFAFPSQWSTSEQCVYPR  
QYAGACPVCPERCFAPSVPNGSCNACLALLRTP

>BmorOBP42

MMGYACVFVILAVLQAI SAEDPPGLPPFLKDAPEKCKSPRVKPNNECCISEPFFKEADFIECGIEKPGSERGPPD  
CSKQNCLLKKYNLLKNDETPDIEAIKSLDKYIEKNPSFKSSVEKAKECLREDLPGPPQICLANRMTLCIGTVLLME  
CPDEKWNTTDDCKAFKDHMTECQKYFPK

>BmorOBP43

MKVCVLF AIFTVAQA AKATLKPISACCNIPELGNPEPLAEC SNPKLPGPCKDIQCVFEKSGFLTENKTLIKEAYKTH  
LRQWAKEHEGWSVAVEKAISDCVDKDLRQYLEFPCSAYDVFTCTGIAMLK KCPNEHWTC

>BmorOBP44

MSRLVFF TILVVLQEFIIINLYFN FITEIDSCCVKKYPKLF DSEFITECYNTQRKANDKCERDMCVARKL NLLTEEDSI  
NKDALLRFVEEGFKTEIDL VNAIKKKCFEEDISNIGKPEMCEVAKYKICITSRMAEDCPKWDSKGICSSAQQKVEN  
FMKMLS

>SlitPBP1

MANARWRFV FVVYALYLSAVLGSQDLMVKMTKG FTRVDDCKTELNVGDHIMQDMYNYWRE DYQLINRD  
MGCMLLCMAK KLDLMD DQTMHHGKTEDFAKSHGADDVAKKLVSVIHECEQQHAGIADDCMRVLEVA KCF  
RTKIH ELKWAPSIEVIMEEVM TAV

>SlitPBP2

MAFCPSVTMSLRVALVVAASLLVVVQASQDVMKNLAVNFAKPLDDCKKEMDLPDSVTTDFYNFWKEGYELTN  
RQTGCAILCLSSKLEILDQELNLHHGRAQEFAMKHGADEAMAKQIVDMIHTCAQSTPDEAADPCM KALNVAK  
CFKLVHELNWAPSVELIVGEV LAEV

>SlitPBP3

MGSRNVFVALVVLTVGMREIEPSKDPMKYIASGFVKVLEECKHELNMNDHLIADLFHYWKLEYTLN RDTGCAI  
ICMGKKL DLDASGRMHGNAQEF AKKHGAGDEVASQIVQIIHDCEKKHERDDDECLRVLEVA KCFRTGIHEL  
NWQPNVEVIVSEVLTEI

>SlitGOBP1

MLLLLRALPLLA AVLPLRADVNVMKDVT LGFGQALDKCRQESQLTEEKMEEFFHFWREDFKFEHRELGC AIQC  
MSRHFNLLTDSRMH HENTEQFIQSFN GEVLARQMVELIHACEKQHDHEEDHCWRILHVAECFKQACVQR  
GIAPSMEIMITEFIMEAEAR

>SlitGOBP2

MTSKCCLLLV LMAAATSSVMGTAEVMSHVTAHFGKALEECREESGLSAEVLEEFQHFWR EDFEVVHRELGC AI  
CMSNKFSL LQDDSRMHVNMHDYVKSPNGHVLSEKLVGLIHNCEKQFDSMTDDCERVV KVAACFKVDAKA  
AGIAPEVAMIEAVMEKY

>SlitOBP1

MKEGNRYSHERRITNDSGDQLMVINATDDDYSYGSGNMGEKLLTSVPRPATPSNNINKNNTSRTKRNEPLL N  
RPDS DQCLSQC VFANLQVVDSRGIPREAE LWNKVQSSVTSQQSRSALHDQIQACFQELQSEAEDNGCSYSNKL  
ERCLMLRFSDR KVDGKGN AKKSSTEQTG

>SlitOBP2

MTRAQVKKTMGIIKNQCMPKNSVTTEE QVGRIEQGVFIEDRNVMCYVACIYKSLQVVKN DKLDMALITKQIDILY

PPELKEPVKKSVAACFHSQDNYSDFCEGVFYASKCLYEK

>SlitOBP3

MWMQALVLTATLATAAAVEMDEDMAELARMVRDNCAGETGVDVALVEKVNAGAELMPDDKLCYIKC  
TMETAGMMADGEVDIEAVLALLPPSLAEHNAPALRACGTQRGADHCDTAFRTQQCWQNANKADYFLI

>SlitOBP4

MTKVLFAIVLTMITFAVVLSASTKEAMTTTMSDQVNSIDVDVLAVMDMCNDSYRIDPTYLQALNESGSFIDETD  
KTPKCFIRCVFENVGIVSEDKQFNPARAAVIFAGERNGKPMEDIADMTALCATDRQETPCDRSYKFLRCLMS  
MEIEREYKS

>SlitOBP5

MSVVRCSLLVAIFCFVSVNAISGDEEAGIKDALRPFVQECADEFGITEEQFEEAKKASAADIDPCFMSFCFLKKA  
EFFDSQGKFDVDSTMAFAKEHLTSEPAMKFVEAVGDECVKINDEDVSDGDKGCDRAKLLFECIAETKKKME

>SlitOBP6

MSKFTCLVLCVAVSLSGVHATAEKAAFIEAVKPYVQECSEKHGVTPEDIKSAKAAGNADGINSFLSCVYKKA  
EVITEKGEYDADKALEKLLKFFVSNEDDYAKFANIGKKCASVNEKSVSDGEAGCERAALLTSCFLEHKSEISA

>SlitOBP7

MDQKRICLFVIAMFLASGSDAMSRQQLKNSGKMLKKNMKNKIGVTEDQIGSIDKGGKFIEDRKVMCYIACIYELT  
NVIKNNKLNYEASIKQIDLMYPPDVKESAKAAVEKCKDVQKYYKDICEASFYAAKCMYEFKPEDFIFA

>SlitOBP8

MLLTKIVKFFILVATCEAMTMKQIKNTGKMMRKTCPKNNAEDEKIDPISDGVFIDEKEVKCYMACIMKMANT  
IKNGKLNDAAMKQADLLFPDDIKEPAKEAITACRKVADAHKDICDASFHVTKCIYNHNPGIFYFP

>SlittoPBP1

MANARWRFVVFVYALYLSAVLGSQDLMAKMTKGFTRVVDCKTELNVGDHIMQDMYNYWREDYQLINRD  
MGCMLLCMAKLLDMDQTMHHGKTEDFAKSHGADDDVAKKLVSVIHECEQQHTGIADDCMRVLEVAKCF  
RTKIHCLKWAPSMEVIMEEVMTAV

>SlittoPBP2

MSLRVALVVAASLLVVVQASQDVMKNLAINFAKPLDDCKKEMDLPDSVTTDFYNFWKEGYELTNRQTGCAILC  
LSSKLEILDQELNLHHGRAQEFAMKHGADEAMAKQIVDMIHTCAQSTPDVAADPCMKTLNVAKCFKLVHEL  
NWAPSVELIVGEVLAEV

>SlittoPBP3

MGRNVFVALVVLTVAMRETEPSKDPMKYIASGFVKVLEECKHELMNDHLIADLFHYWKLEYTLLNRDTGCA  
IICMGKLLDLLDANGRMHHGNAQEFAKKHGAGDEVASQIVQIIHECEKKHERDDDECLRVLEVAKCFRTGIHEL  
NWQPNVEVIVSEVLTEI

>SlittoGOBP1

MLLLLALPLLA AVLPLRADVNVMKDVTLGFGQALDKCROESQLTEEKMEFFHFWRDDFKFEHRELGCAIQC  
MSRHFNLLTSSRMHHENTEQFIQSFNGEVLARQMVELIHACEKQHDHEDDHCWRILHVAECFKQACVQR  
GIAPSMEMMITEFIMEAEAR

>SlittoGOBP2

MATVTSSVMGTAEVMSHVTAHFGKALEECREESGLSAEVLEEFQHFWRDDFEVVHRELGCAIICMSNKFSLQ  
DDSRMHVNMHDYVKSFPNGHVLSEKLVGLIHNCEKQFDSMTDDCERVVKVAACFKVDAKAAGIAPEVAMI  
EAVMEKY

>SlittoOBP1

MFKLCVFLALGFVACHGASNSNPGTPNANPGTYCGVTPDNIRCLNNPRVVTPEVSTKCGSQFTECEKMTCIF  
RELKWSKRGAIKAKVRAYFDQYETEHPWAQAVQHVKAFCLASELRAQGVFLNCPAYDIMQCVLASFIKHAS  
PSVWSTATDCAYPKAYAADCPCVPCSDCYSPIPYGSCNACYTQPRTV\*

>SlittoOBP2

MVRKISGLLCLCVFGISFSDSAISADSESRNPPPTAPQKIERVITLCQDEIKLSILREALDVIKEEHTMPAQRRRD  
KREVPFTHDEKRIAGCLLQCVYRKVKAVDGYGFPTLEGLVGLYSYDGVNERGYFMAVLEASRECLMKNHDKFSRT  
VPMDNDRNCDISDFIFECISDRIGEYCGTSGL

>SlittoOBP3

MKSFVVICIVFVVGVCATEKGNKIASECIKESGVKSDVLAEAKKGNLGGDDPAFKEFTYCFKVKVIVGEDGKLNDR  
VAIAKLPSGVDKAEAEKLLDSCSKTGKDAVETVYEIFKCYQHGTKSHIMFAS

>SlittoOBP4

MKTLLVFAACILVAQALTDEQKEKLLKHRTECLTETKVDEQLVNKLGKGDYKMDNEALKKYALCMMMKSSELMT  
KDGFKFDVALAKVNPADKPTVEKLIDACLANKGNTPHQTAWNYVKCYHEKDPKHAIFL\*

>SlittoOBP5

MTKVLFAIVLTMVTFVAVLSASTKEAMTTTMSDQVNSIDVDVLAVMDMCNDSYRIDPTYLQALNESGSFIDET  
DKTPKCFIRCVFENVGIVSEGDGKQFNPARAAVIFAGERNKPMEDIADMTALCATDRQETPCDRSYKFLRCLM  
SMEIEREYS\*

>SlittoOBP6

ESKFGIIVKRTVIATAHTCMDHVNATAKDLHLRDEPPYPETSACIVKCLLEKVKYMRKQTN

>SlittoOBP7

MFTEALPLFVILVAVTHGGKNKPVFSDEIKEIIQTVHDECVAKTGVAEEDITNCENGIFKEDAKLKYMFCLEEAS  
LVDDDDTVDYDMLVSLIPDEYYERTTKMIFACKHLDTDPKDRQRAFEVHKCSYEKDPDLYFLF

>SlittoOBP8

MFGSKIVFSLMIVSVCYGAVDIKKYFKVCDRNAIDVNDMAEAVRQGIATMINGIDELGVPPIDPYLQKDFRLE  
YKNNQLAAKLTLNKIYVEGLKEAIVHDARLRADDDKFHLEVDLSGPRVSVRSYYGEGQFNALKIVAYGQVNTT  
MTDLVYTWKLAGVPEKNGTETYIRIKDFYMRPDVGSVLTFRNDNPESRELTDLGRFANENWRMLYKEFLPY  
AQANWNRIGVRVANKLFLKVPYDQLFPTSS

>SlittoOBP9

MCLVKYHVLVLCVILVGSYALNCRSSGGPKAEELKNIYKCLKMQEGKNSSKGNASQDWKEPRVQIQSNDNDG  
SGNRGRGNKNNRNDMNGRDRDFGRDDYFNGREDFPQSDYEGGDMGQYNNNYSTTQSSRRYKRERRPS  
NSGQRSQYNPNNHKISGYEDNFRSDERNTTDNNSKETDNKSCALHCFLENLEMTGEDGMPDRYLVTHAITK  
DVKNEDLRDFLQESIEECFQILDNENTEDKCEFSKLLIDLSVRE

>SlittoOBP10

MKEGNRYSHERRITNDSGDQLMVINATDDDYSGYSGNMGEKLLTSVPRPATPSNNINKNNINRTKRNEPLL  
RPDSQCLSQCVFANLQVVDKIPREAEWLNKVQSSVTSQQSRSALHDQIQACFQELQSEAEDNGCSYSNKL  
ERCLMLRFSRDKVDGKGNNAKKSSTEQTG

>SlittoOBP11

MSKFTCLVLCVAVSLNGVHATAEKAFAIEAVKPYVQESKEHGVTPEDIKSAKAAGNADGINSFLSCVYKKA  
EVINEKGEYDVKALEKLLKFFVSNEDDYAKFANIGKKCASVNEKSVSDGEAGCERAALLTSCFLEHKSEISA

>SlittoOBP12

MSVVRCSFLVALFCFVSVNAMSGDEEAGIKEALRPVQECADFEFGITEEQFEEAKKASAADIDPCFMSFLK  
AEFFDSQKFDVDSTMAFAKEHILTSEPAMKFVEAVGDECVKINDEDVSDGDKGCDRAKLLFECIAETKKKME

>SlittoOBP13

MITSSLLVLTAVVQVLFAQQPVFESGPPPEWGPQRPARRRQFLPRIPKRCWVPPQRINVYNCCPIPTLYPDED  
MQSCGFECTSGNTDQPQKPVFRPEGTCKEYCVMGKFDLLFANNSVDFVKFREYLDNWAESYPEFANAIRIAK  
QECAQDGGPEVPPICEPKLFLCLTSTIFWNCKLRDGDGCAALQEHMNECKQYYTRQMEPTMKDIEVR\*

>SlittoOBP14

MDQKRICLFVIAMFLASGSDAMSRQQLKNSGKMLKKNMKNIGVTDDQVGSIDKGFIEDRKVMCYIACIYEL  
TNVIKNNKLNYEASIKQIDLMYPPDVKESAKAAVEKCKDVQKYYKDICEASFYAAKCMYEYKPEDFIFA

>SlittoOBP15

MFNFCVYSMTREQIKNSGKLIKTCSTAKNDLDEVDKDVQKGFIEKDFMCIACVYKMGQTVKGSTINHD  
MMLRQVDMFMFPNDMKAPVKAIEHCRPVAKNYKDLCEASYWTAKCIYDFDPANFMFP\*

>SlittoOBP16

MLAEELKDCFDGSGPKDPMKCEIDLCAKKGKGFATDDGKLDIKKFEEVITKDVGSDDKLLDEIKTNCINGDLNNY  
GPPEFCDFIKIKHCVTLHMMNHCSEWSDDGNCKVVKELVGKCAKVI\*

>SlittoOBP17

MRTFRLLCCILSIFIFDQSYGMTRQQLKNSGKLMKSCMPKNDVTEDEVGDIEKGFIESTRNVMCIACVYTM  
SQVVKNNKLSYEAVIKQVDVMFPAEMRDAVKAATHCKETTKYKDLCESSYWTAKCMYDYDAQNFVFP\*

>SlittoOBP18

MILXYTQKLTNMLLTKIVKFFILVATCEAMTMKQJKNKGKMMRKTQPKNNVEDEKIDPLSDGVFIDEKEVKCY  
MACIMKMANTIKNGKLNDAAMKQADLLFPDDIKEPAKEAITACRQVADAHKDICDASHVTKCIYNNHNSIFY  
FP\*

>SlittoOBP19

MYSKICILLFISYTCLVTADSVSFIKCKWDDGKCAKESGQNVQKFAAGISEYNVGVSDPLHIEYVDASSPNMKLI  
VTDVVVTGLRNCEVKKIQRFEDESKLIVKLLCAAELNGKYDMKQQLFVPIEGNGGLYSKVPKIQINAEVDLNTKQ  
GKDGKDHVIVKSWRHTFELKDKSTVKFENLFPDNEFLRTSTNELIAQNGNDVIEIGANLIKAVGKIVENIKKFFI  
AVPIEDLSL

>SlittoOBP20

MWVQALVLTATLVTLVAAVEMDEDMAEARMVRDNCAGETGVDVALVEQVNAGAELMPDDKLCYIKCT  
METAGMMADGEVDIEAVLALLPPSLAEHNAPALRACGTQRGADHCDTAFRTQQCWQNANKADYFLI

>SlittoOBP21

IHYLCAARAVHKIKNITNCENGIFKEDAKLKCVMFCLLEASLVDDDDTVDYDMLVSLIPDEYERTTKMIFACKH  
LDTDPDKDRCQRAFEVHKCSYEKDPDLYFLILRREQLASRDCCVAISGIN\*

>SlittoOBP22

MNRLLLVYLVLYAGCSYGMTRAQVKKTMGIIKNQCMKNSVTEEQVGRIEQGVFIEDRNVMCYVACIYKSLQ  
VVKNDKLDMALITKQIDILYPPELKEPVKKSVAACFHSQDNYSDFCEGVFYASKCLYEKDPASFIFP

>SlittoOBP26

MFNSSVFMVCLYFCALTPYLVSAMTAEQKALIEHFETIGKSCNKDSTMITAEDIANLRACKIPTGPNAPCFLAC  
MMKQIGVMDDNGMVQKETALEMAKAVFDDPEEIKAIEDYLHSCSHINTESVSDGAAGCERAMLAYKCMTEN  
ASKFGFDI

>SlittoOBP31

RTEIDKSAYIDMLANFTGSHQAWIRATEKVVSRLNANNLERRSDCLINDVLACTLDVLTEYCPYKRKSGICKHG  
KHDVPCQISSKSRPKNRREICLLPELVHHDHLYECDLDALYKVERVAVPVRHKKHVPSLWHNCKQLETQTSI  
MDKMILNRYKFMDFYKMKDKIRQFTEDKPEWSAMMDIYTSAYINLPMYSDHCTSERKLLNVIDTMLMTCP  
VSKRKNTPQCNSLFMEMVKATPADNQTVTKEKAXXNYEALPPRXVSDR

>SlittoOBP25

MSKLSCIVCAVAMRLCVFVASEDANSIFHAPIKPIVIDCAKEYGLSEDDIKNRGLDGLKNLPPCFIRCVLNKLDI  
NDKGQYDADSGIATIKGLMSNNEYLEKISGVLKECESVNEKSVSDGDAGCERALLGAMCYLDHKTIVLA

>SlittoOBP24

MYKIISLVFCIAVCLNRVHGNAEDKIAIMTAVKPFVEECAKKGVTFEALLTAKASGKIDGVEPCFYSCVYKTEFL  
NSKGEYDVTALAKLKKYISNDDDYAKLSQVGKRCASVNSKPVGDGEAGCERGVLLTQCFLDHKGSVPM

>SlittoOBP28

MIVRFLCLYIVFYGVHVQARTDQEIKAFFFREGMDCNIEHPISXKEMLELKENKIPDTNNAKCFVACVFKKTG  
MLDSXGMFDAENSIAMTQKDFANDPNRLESSKKLLETCKKVNDETVSDGEGKCERSVLLHKCFVETAPQLGIKL  
P

>SlittoOBP29

GLTEELKMEFTKLIMKCNKDGEVDMTELVQLQNYVVPKQSTKCVLACAYKAAEVMNAKGEYDIDHAYKVAE  
MMKNGDEKRLVNAKMMADLCVKVNELSVSDGEGKCDRAAMIFKCTVENAPKFGFKL

>SlittoOBP30

HKFSAIQIPYNVLSRDDSNLYLVNFFNVVITKNYYETNNSKQALSMDLQKYVDNILECSKQYPIBRADAEQL  
QNRIMPDKPEIKLCLFACVYKLAGMMNDQGELSVGEVNAISRKYLAEDPEKLQKSEEFTEACRSVNDAPVSDGT  
RGCDRAALIFKCTIEKSPEFNFV

>SlittoOBP27

QLFNSGVVFCIIVAVFLKNASAITDELKAHIEAKFLTVAECIKEHPLTIEDLSAFKNRVFPDGENAGCFSACIFNKL  
GLFDDKGTLSHLTALENAKKVFEDQGELESIEKFLTTCAKVNDEEVSVDGEGKGERAKLAYNCFIPKTIEQLGFDL

>SlittoOBP23

MAKLSCLVLCVVAASLGSIHVAKGESLRESLRPVIVACSKEHGVTDAEIQAAKEAGSPASIKPCFIACVFKKAGFIN  
EQGQLDLETGLKNLRQFVKDDEQYKQLEGVANKCSPVKDKAVSDGAAGCDRQVHLAGCFDHLKTSIII

>HarmPBP1

MEFHRSTMMSVRLALVVAVCLFIRVDASQDVIKNSMNFAPLEDCKKEMDLPDSVTTDFYNFWKEGYEFTN  
RQTGCAILCLSSKLELLDQELKLHHGKAQEFAKKHGADDAMAKQLVDLIHGCAQSTPDVADDPCMKTNLVAKK  
FKAKIHELNWAPSMELVVGEVLAEV\*

>HarmPBP2

MAASRWLFARAFCLVLMMSAMSSKELLTKMTGGFTKVV DACKTELSVGDHIMQDMYNFWREEYQLVNRD  
LGCMIMCMTAKLDLIGDDQKMHHGKAEFAKSHGADDALAKQLVGLIHGCETQHQAIEDHCSRALEIAKCFRT  
KIHCLKWAPSMEVIMEEIMTAA\*

>HarmPBP3

MGRSHVFFALVVLAVSVRKAEPSKDAMQYITSGFVKVLEECKHELNLNEQILADLFHFWKLEYSLLGRDTCAL  
CMSKKLDDLDANGRMHHGNAAEFAKKHGAGDEVASKIVTIIHECEKKHEQDGDDECLRVLEVAKCFRTGIHEL  
WQPKVEVIVSEVLTEI\*

>HarmGOBP1

MPGVLRALLVAAAAPLLADINVMKDVTLGFGQALDKCREESQLTEEKMEEFFHWRDDFKFEHRELGCALQC  
MSRHFNLTDSSRMHHDNTEKFIQSFPNGEVLARQMVELIHSCEKQFDHEDDHCWRILHVAECFKGSCVQRG  
IAPSMELMMTEFIMEAEAR\*

>HarmGOBP2

MTSKSCLLVAMATLTASVMGTAEVMSHVTAHFGKALEECREESGLSAEVLEEFQHFWRDFEVVHRELGCAL  
CMSNKFSLQDDSRMHVNMHDYVKSFPNGHVLSEKLVELIHNCEKKYDTMTDDCDRVVVAACFKVDAKA  
AGIAPEVAMIEAVMEKY\*

>HarmOBP1

MSKFTFFVLCVVAVSLSKVYASDEDKAKLHEALKPLVEECMKDHEVSLDDLKAAKEAKSADGVKPCFLACVYKK  
AEVLNDKGEFDADHALEKLKEFVSDVDLAKVAEVGNTCKAVNDKAVSDGDAGCERALLTACFLEHKAEILV\*

>HarmOBP2

MMDRKRLLIIAMFLAQGSDAMSRQQLKNSGKMLKKNMKNQVTEQIGSIDKGFVEDKKVMCIYACI  
FEMTNVVKNNKLNVDASIKQIDLMYPPDLKESAKAAVEKCKDVQKKYKDICEASYWTAKCMYDFKPEDFIFA\*

>HarmOBP3

MSKFTCFVLCVLAVSLGEVRSNALEKAAIRAAVYPLIVDCAKEHAVTLEQLKAAKASHSAEGINPCFQSCVYKKT  
GIFNDNGEYDVANAKTKLQKFVTDDEYARIAEVLGKTCASVNDKSVSDGAAGCERAALLTACFLEHRAQIII\*

>HarmOBP4

MSKLTCVVFAAVAVVFSNVNADDETRASFRQVLGPLVMECRNEFGITEDDLKKAQQERSPDALKPCFIACVFKK  
FGIITSAGKYDSDASISRIKDVVKNDLLAKLKSVEKCNVNDASVSDGDAGCERAALLAKCFIENKSELISI\*

>HarmOBP5

MSKFTCLVLCVVAASLSQAYASEEEKAAFREAIKPIVEECSKEHGVSHDELKSAKDNQADNIKPCFLGCVYKKA  
VFNSKGEYDVKALEKLFVSNDEAYAKFAEVLGKTCASVNDKAVSDGDAGCERGALLTACFLEHKAEVPL\*

>HarmOBP6

MSKFTCLLLCVAVSLSKVHATEEEKAAIRAAVRPIMQECGKEHGVTLDDLKAAKAAHSADGIKPCFQSCVYKKA  
GIFNDNGEYDIANAKTCLQKFVTDDEYARIAEVLGKMCASVNDKPVTDGAAGCDRAALLTACFLEHRAQIII\*

>HarmOBP7

MFRFGVLSFVLLFCMESSYALSSEEELSIKALHPFVVECAEEYGMTEEMFEEAKKKGSAEDIDPCFMSCFLKKT  
GFFDDSGKFDKAEKISFAKEHITSEAIKFLGAGGECVKINDEDVSDGENGCDRAKLLFDCLTELKKKMS\*

>HarmOBP7.2

MSRFGVLSFVLLVFCMENIYALSSEEELSIKALHPFVVECAEEYGMTEEMFEEAKKKGSAEDIDPCFMSCFLKKT  
GFFDDAGKFDKAEKISFAKEHITSETAIKFLGAGGECVKINDEDVSDGDKGCDRAKLLFDCLDLKKKMS\*

>HarmOBP8

MLLIEIVKFLTLVAMCEAMTMKQIRNTGKMMRKSCQPKNNVADEQIDPIAEGVFNEDKEVKCYMACIMKMA  
NTIKNGKLNIEAAIKQADLLPDDIKEPAKEAITACRQVADAYKIDICDASFHITKCIYTQNPQIFYP\*

>HarmOBP9

MCKFSVFLYSAVMAVNIWSASCISEEDKAAIITAIAPLAQNGSECGLDNDDFEKYKEDGSDMDPCFKACLMT  
QMGVLDKEGKYDGKGLHKAMEEADYPGDKDDAQKFLDELDRCFDAKGDNSGSDEEAKMKRADVLFRCMQ  
DMKEK\*

>HarmOBP9.2

MCKCSVFLYLAVMAINIWRASCLSEEDKAAIITAIAPLAQNGSECGLDNDDFEKYKEDGSDMDPCFKACLMT  
QMGVLDKEGKYDGKGLHKAMEEADYPGDKDDAQKFLDELDRCFDAKGDNSGSDEEAKMKRADVLFQCMQ  
DMKEN\*

>HarmOBP13

MFTGTLPLVFLATFAYGGKEKPVFSEIIEIQTVHDECVAKTGVAEEDITNCENGIFKEDPKLKYMFCLMEEA  
SLVDDDDAVDYDMLVSLPIEYVDRRTTKMIFCKHLDPDKDKQRAFEVHKCSYEKDPDLYFL\*

>HarmOBP18

MKSFVFCVFLVAGAFANVSLPPKQNEKANQIATECMKESGLKPEVLAEAKKGHISDDEHLKFTFCFFKAGIV  
SEDGKLNTEVALAKLPPGVDKAEAEKLETCGKGTGKDVTDVFEIFKCYHHGKTHILLGF\*

>HarmOBP15

MGSRHVFFALVVLAVSVKKEKPSKHPMPYITSRFVKVLEECQHELKLNHILEHLFHFVKLEYSLLGKDPGCAIIC  
MSTKLDLLDLYGRMHRGNAAEFKHAAGDEVPSKIVTIIHFCQKKHEQDGDDECLQVLEVATCCRTGLHDLNW  
QHQVEVIVPDVLTEI\*

>HarmOBP16

MFKLCVFLAFIVATCHGGTLERTSSTCGQIPRELTACLQLQPAVSPEIQEKRRANECERLTCVFREYNLLDGAEV  
NKERTAFLDNFVKQYPSWEVAIDVAKTSCLRSSGLKPGVFLDCPAYDIIQCVFANLVKNALPSQWSSMSQCN  
HAREFAAACPICPDACFAPLPIGTCNACSAARRSS\*

>HarmOBP17

MRAWSVTLVALLGALGAARAVAMDEDMAEARMVRENCAETGADVALVERVNAGADLMPDDKLCYIKC

TMETAGMMADGEVDIEAVLALLPPELAEHNAPSLRACGTVRGADHCDTAFRTQQCWQNANKADYFLI\*

>HarmOBP18a

MTRQQLKNSGKLMKKSCMPKNDVTEEEVGDIEKGFIESRNVMCYACIYMTMTQVVKNNKLSYEAVIKQVDM  
MFPAEMRDAVKAATSKDITKSKDLCEAYWTAKCMYDYDAENFVFP\*

>HarmOBP19

ARTEHEIKEWLFREGVACNKDFPITPDEMMLKDNKLPDSTNAKCLACIFKKTGMIDSKGMFDPDKSIAMTE  
KDFADNPEKLATSKKLMEACRGVNEQAVADGEKG

>HarmOBP20

KVFYLLTVLSACYGAVDITKYFKTCNRNAIDVNDKCMADAVQKGIAMMINGIDELGIPPIDPYLQKDFRLEYKNNQI  
AAKLNMKNIQVEGLRAAKVHDARLRADDDKFHLEVDLTSPKVTVHAEYHGEKGFNSLRILAFGEVNTTMTDLV  
YTWKLDGVPEKNGTETYIRIKEFYMRPDVGSIVTNFKNDNPESRELTDLGTRFANENWRTLYREFLPYAQANW  
NKIGTKVANKLFLKVPYDQLFPTSS\*

>HarmOBP21

FQMSRAQVKKTMSLVKNQCMPKNSVTEDQVQKIEEGVFLEDRNVMCYACIYKNLQVVKNDKLDMSLITKQI  
DALYPPELKEPVKKAVSLCIHSQDNYNDLCEKVFHASKCLYEKDPASFIFP\*

>HarmOBP22

MTREQIKNSGKLIKKTCTMAKNDLSEDQVKDVKDKGFIEEKPFCYIACVYKMGQTIKGNVTNHDMMIKQVE  
MMFPNEMKAPMKAIEHCRPVVKKYKDVCEVSYWTAKCIYEFDPNFMFP\*

>SexiPBP1

MAGAKWQFVCVVFALYLTSAALGSQELMMKMTKGFVKVDDCKAELNAGEHIMQDMYNYWREDYQLINR  
DLGCMILCMAKLDLDMEDQKMHGKTEEFAKSHGADDEVAKKLSIIHECEQQHAGIADDCMRVLEISKCFRT  
KIHCLKWAPNMEVIMEEVMTAV\*

>SexiPBP2

MAFCRSATMSVRVALVVAASMLVVVQASQDVMKNLAINFAKPLDDCKKEMDLPDSVTTDFYNFWKEGYELT  
NRQTGCAILCLSSKLEILDQELNLHHGRAQEFAMKHGADETMAKQIVDMIHTCAQSTPDVAADPCMKTNLVA  
KCFKLIHELNWAPSMELIVGEVLAEV\*

>SexiPBP3

MGSHNVFVALVLLAVGMRVAEPSKDAMKYITSGFVKVLEECKQELNMNDHIIADLFHFWKLEYALLSRDTGCVI  
ICMSKLDLLDANGRMHHGNAQEFAKRHGAGDDVASKIVQIIHDCEKHERDDDECLRVLEVAKCFRTGIHDL  
DWQPKVEVIVSEVLTEI\*

>SexiGOBP1

MLFLLRALPLLA AVLPLRADVNVKMDVTLGFGQALDKCRQESQLTEEKMEEFFHFWRDDFKFEHRELGCALQC  
MSRHYNQLTDSSRMHHDNTEQFIKSFNGEVLARQMVELIHSCEKQYDHEDDHCWRILHVADCFKQGCVQR  
GIAPSMEMMMTEFIMEAEAR\*

>SexiGOBP2

MTAEVMSHVTAHFGKALEECREESGLSAEVLEEFQHFWRDFEVVHRELGCALICMSNKFSLQDDTRMHHV  
NMHDYVKGFPNGHVLSEKLVLIHNCEKRFDSMTDDCERVVKAACFKVDAKAAGIAPEVAMIEAVMEKY\*

>SexiOBP1

MSKFTCLVLCVAVAGCLSGVHATAEKAALIEAVKPYIQECSKEHGVTPEDIKSAKEAGNADGINACFLRCVYNKA  
GVINDKGEYDADKALEKLVSNEDDYAKFAEIGKKCASVTETSVDGEAGCERAALLTSCFLEHKSEVHA\*

>SexiOBP2

MKSFVVCIVLVVGVCANEKGNKLDLRFASECIKETGVKNELLEAKKGIISEDPAFKAFTYCFKKIGIVGEDGLL  
NRDVAIAKLPVGDKSEAKLLDSCSKTGKDAVDTVFEIFKCYQQGKSHIMFAS\*

>SexiOBP3

MVKLTCVVFCAMALSVFVAGEDANSVFQGAIKPLIAECAKEYKLSDEELLKNRGLAGLSNLPPCFIGCVLKKF  
DIINDKGLYDAEAGIAKIEKLLPNNEFLDKISGVLKSCESANEKSVGDGDAGCERAVLVATCYLEHKTAVIA\*

>SexiOBP4

MWNFLVFLAICSCVYGLTEELKMEFTKLIMKCNKDGKVDMTLVQLQNYVVPTKQTTKCVLACAYKAAEVM  
NAKGEYDIDHAYKVAEMMKNGDEKRLVNAKKMADLCVKVNEQSVSDGEGCDRAAMIFKCTVENAPKFGFK  
L\*

>SexiOBP5

MTMKQIRNTGKMMRKTQPKNNVEDEKIDPIAEGVFIDEKEVKCYMACIMKMANTIKNGKLNDAAIKQAD  
LLLDDIKEPAKEAITACKKVADAHKDICDASFHITKCIYNHNPGIFYSP\*

>SexiOBP6

MLGSLLFVFAFSVFLGAEALLIDDLKQKYADSILQCSQQYPLDRADAELLQNKVMPDKESTKCLFACVYKVTGV  
MSDQGELSVVEGVNALSQKYLADDPEKLLKSEEFTEACRTVNDAPVSDGARGCDRAALIFKCTIEKSPDFSFV\*

>SexiOBP7

MTKVLFAIVLMMITFAVTLASTKEAMTTTMTDQVNSIEVDVLAVMDMCNDSYRIDPTYLQALNESGSFIDET  
DKTPKCFIRCVFENVGIVSEDGMQLNPARAAVIFAGERNGKPMEDIADMTALCATDRQETPCDRSYKFLRCL  
MSMEIEREYKS\*

>SexiABP1

MSVVRYSSFVALFCLVSVNAMSGDEEAGVRDALRPYVQECADYEGITEEQFEEAKKKASADDIDPCFMSCFLK  
KAEFFDAQGKFDVDSTMAFAKEHLSSEPAMKFVEAVGDECVKINDEDVSDGDKGCDRAKLLFDCAIETKKKM  
D\*

>SexiOBP10

MDRKRICLFVIAMFLASGSDAMSRQQLKNSGKMLKKNCMNKIGVTEQVGSIDKGFIEDRKVMCIACIYEL  
TNVIKNNKLNYEASIKQIDLMYPPDIKESAKAAVEKCKDVQKKYKDICEVSFYAAKCMYEFKPEDFIFA\*

>SexiOBP8

MARRQQGAMFTETLPLFVILVAVTHGGKDKPVFSDEIKEIQTVHDECVAKTGVAEEDITNCENGIFKEDAKLKC  
YMFCLLEEASLVDDDDTVDYDMLVSLIPDEYYERTTKMIFACKHLDTPDKDRCQRAFEVHKCSYEKDPDLYFLF\*

>SexiOBP9

MKTLFVFAACILLAQALTDEQKEKLLKHRTECLSETKVDEQLVNLKGGDYKTESEPLKKYALCMMMKSSELMTK  
EGKFKKDALAKVNPADKPTVEKLIDACLANKGNTPHQTAWNYVKCYHEKDPKHAIFL\*

>SexiOBP11

MKEGNRYSHERRITNDSGDQLMVINATDDDYSGYSGNMGEKLLTSVPRPASSNNINKNNTRRRRNEPFL  
NRPDSQCLSQCVFANLQVVDSRGIPREAELWNKVQTSVTSQQSRSALHDQIRACFQELQSEAEDNGCSYFNK  
LERCLMLRFSDRKVDGKGNPKKSSTEQT\*

>AipsPBP1

MAPHPSVTMYVRLALVIIAGLFITVECSQEIIKNLSLQFAKPLEDCKKEMDLSDTVITDFYNFWKEGYEFTNRQFG  
CAILCLSSKLELLDQDLKLHHGKAQEFAKKHGADEAMAKQLVDMIHSCTQSTPDVADDPCMKTNLVAKCFVAK  
IHDLKWAPSMDLIMGEVLAEV\*

>AipsPBP2

MAASRWCIACLVCVLAARSVMTSQEVVASFSKFTNVVEHCKAEVNAHEHIMQDIYNFWREEYQLVNRDLG  
CMVLCMANKLGLIGEDQKMHHAKAEFAKSHGADEAVAKQLVAILYECETKHAAVEDECMALEIAKCFRTK  
MHELKWAPSMEVAMEEIMTAV\*

>AipsPBP3

MGTYNVFFAFVLMAGVREIEPSKDAMKYITSGFVKVLEECKQELNMNDRIIADLFHYWKLDYLLNRDTGCAI  
ICMSKLLDLLDDTGRMHGNAQEFALKHGAGEEVASKIVTIIHDCEKKFERDDDECLRVLEVAKCFRTGIHLDL



WQPKVEVIVSEVFTDM\*

>AipsGOBP1

MTQPQGQVLLVLLAAAAALADVNVMKDVTLGFGQALDKCRQESDLTEEKMEEFFHFWRDDFKFEHRELGCAIQ  
CMSRHFNLLTSSRMHHVNTEEFIQSFPNGEVLARQMVALIHGCEKQFDHEDDHCWRILHVAECFKHACVAH  
GVAPSMEMMMTEFIMEAEAR\*

>AipsGOBP2

MTLRCCLLLVVAAVTRSVVGTAEVMSHVTAHFGKALEECRDESGLSAEVLEEFQHFWRDFEVVHRELGCII  
CMSNKFSLQDDSRMHVNMHDYVKGFPNGEVLGKLVLIHNCEKQYDTLTDCCRIVVKAACFKVDAKA  
AGIAPEVAMIEAVMEKY\*

>AipsOBP1

MDISKRRSKNAFRLLVNTWLRVQIFTCLSAPPVVSADVTSKCQGSKYENECDKLTCVFRKAKWLDGNAVDKA  
KLITYFEQFEKDHPEWAPAMQNVKTSCLGAEKLTQGVFLNCPAYDVMHCVLGSFIKHATPTQWSTSASCSYPR  
AYAAACPICPEDCFSAQVFPFGSCNACYLPPRTP\*

>AipsOBP2

MSKFTCLVLCVVAASISRVHADDANKAAFREAFKILDECSKEHGVSNDDIDAACKAGSADAIAKPCFFGCIYKK  
AEVFNAGEYDVSALSCLKKFPDEAKFAKYAEIGKKCASVNEKPVTDGDAGCERGAMLTACFLENRAEMLI\*

>AipsOBP3

MIRSCRCLVFAAVFQVVLGQGLTGTDSGPPGFQRPQSYVPKHCFAPPPVDLHTCCPIQLPDEDMESCGIQK  
LTKEQYENPSPARIPCQESICLLRNANLLKQNSIDYKMGDFVDNWAQMDPDTIPITNAKKVCLIEGGPPAPP  
VCEPDRIFTCLTSYVLWNCRLRDSGEGCKILKEHMDGCRPFLAGP\*

>AipsOBP4

MFGYQFLSFAAALICFGSSYALTSEEEANIKEAFHFPFIMKCAEEYGITEEQFEEAKEKHSAGIDPCFMSCFMKES  
GFFDSAGKFDADKTKFVDAHLTSERAITFMEAVGSECAKVNDEEVDGDGKCDRAKLMWGCIDLKEKMEG  
SE\*

>AipsOBP5

MKYFVLFVALVAGIHANVTLPPSEQSEKALKTASECIKETGVSKEVLAEAKKGHIADDEGLKKFTLCFFKAGIVDN  
DGKLNLETALAKLPPGVDKAEAKKVLGECQAKSGKTPQDTAFIYKCYHAGAKTHIALAGI\*

>AipsOBP6-PG

QRENKGASLPLSVCCDIPELGDPKHLAKCSNPKLPGPCNDVQCVFEESGFLTDKNTLNKEAYRNHLKQWEEN  
NKGWTVAVDKAIKEVDNDPRQHLDIPCKAYDVFTCTGIAMLKCPDSAWKC\*

>AipsOBP7

MSKFTCVLCVVALSLSVYVTRAHKPNLRDAWRSELDECAKEYPVTNDEIDTAVRSGDSSNLNFCNFCVFNKT  
GFFTENGEYDLKNGLIKLRKAIRDDEEYTKFEEVATECTEDKNTSCDEKAKCDSANRLSLCFLRFKDKVRI\*

>AipsOBP8

MYLRSTNGGVRSFPLGESAYTTKIVEICSKETGLKQVPPEEKEIKFSQRKGLREFNDCYLAKTGVTSDGKLNIDE  
ALEKLPPGFAKPFVEHCQANIILGYIEENVNDFSTCFHQEVQNHLLSFYGFENYWVMLVLGTSFDKTRFTTLFFD  
KHDFWLAERAGFVNL\*

>AipsOBP9

VFICGVLSLNVKASSLDELKMKYVEMIIECSDTYPITAADTLQLKTKTMPDNESIRCLFACVYKKAGMMNEQGEL  
SVEGVNEMTRRYSDDPKIKKSEQFTEACKSVNDVPVSDGTRGCDRAALIFKCTVEKSPDFDL\*

>AipsOBP10

CYRLKTQYSVFHFRKIKRYVLRFSNYVFFISDPFGFKCKSADEECVLENAKAGVVPFVNGIPEFGVNLDPDFL  
R\*

>AipsOBP11

MTYKVFILVFLTYVSLATSALAPFITKCKWDDSKCIKESAQKVIPLFADGIPDLHVEKHDPPLIKRVDASSPNLKLIVT  
DIEVKGLKNCEAKKITRDLKAMKLSVKFLCAVDFKGVYDMKGQLFVLPFIEGNGDLTAHVPKIQLNAEVDMMVDTK  
GKDGGKHWGVKSWRHSFELKEKSNVKFENLFPDNEFLRKTTEELIASNGNDVIVEVGPFIKAVTAKVIESIKLFL  
DEVPVEELAIDE\*

>AipsOBP12

MYSGTIFLFSFILLIVSNVTFVSSQMTREQVKNSGKLVKKTCSAKNDLTEDEVKDVDKGKFIEEKKFMCYVACVYK  
MGQAVKGNLSLHDMIRQVDMFLPADMKAPVKAIEHCRPVAKKYKDICEASYWTAKCVYEFDPNFMFP  
\*

>AipsOBP13

MVLIYIVKFLILVAMCEAMTMKQIRNTGKMMRKSCQPKNNVEDEKIDPIAEGIFIDEPEVKCYMACIMKMANT  
LKNGLNFDAALKQADLLLPDDIKEPAKEAIIACKKAAEGHKDIDCVSFHVTKCIYNQNPFIYFP\*

>AipsOBP14

MFDPKTVFYLLTVFSVFCGAVDIRKYLVCDRNAIDVSDCLTDAVQKGIAMVNGIEELGVPPIDPYLQKEFRVEY  
NNNQIAVKMVIKNIYVEGLDKDAKVHDARLRADDKHFLEVDMTSPHFVKAHYHGEQFNSLKVVAAGDFNT  
TMSDLVYTWKLDGVPEKNGSEYVRIKEFYMRPDLSSIVTSFRNENPETRETELGARFANENWRTLYKEFLPYA  
QANWNRIGVRIANKLFLKVPYDQLFPSSS\*

>AipsOBP15

MDHNRLCLLVIAMFLATGSDAMTRQQLKNSGKILKKNMKNKHQVTEQIGTIEKGFVEDKKVMCIYACIYEL  
TSVIKNNKLNYESLRQIDIMYPADLKESAKAAVENCKDVQKKYKDICEASFHTAKCMYDFKPEDFIFA\*

>AipsOBP16

MFPGSIPFISGCVHLGVSNYFRSTQSNLVVHYEDDQIVDAIYNCQDENGDFDEVLSNSTNLEENFPEKEGLKSN  
DCFLKKTGFVTS DGKLNIDKTLEKLPSPFVKPIVEHCQANIALNYTTESVENFSSCYHDGILNHIFAATEVGIFPIQ  
TWKFFVPGTSFADTILILN\*

>AipsOBP17

MNQLLVFVLIVACVRISNGMTREQVKKMTMTVIKKQCMKNSVTEQIGKIEQGVFNEDRNVMCYVACVYKSL  
QVVKNERLDLGLISKQIDALYPPELKEPTKKAVSQCINIQDSYNLCEAVFHSVKCLYEKDPATFIFP\*

>AipsOBP18

MKTLFVFAACILLAQALTDEQKEKLLKHRTECLTETKVEEALVNKLKGGDYKTESEPLKKYALCMMTKSELMTKD  
GKFKKDALAKVPNAADKPSVEKLIDACLANKGNTPHQTAWNYVKCYHEKDPKHAIFL\*

>AipsOBP19

MFTGTVPFVCLVAVAFGGKDKPVFSEEIKEIQTVHDECVANTGVAEEDITNCENGIFKEDPKLKCYMFCLMEE  
ASLVDDDGTVDYDMLVSLIPDEYERTTKMIFACKHLDTDPDKCQRAFEVHRCSYEKDPDLYFLF\*

>AipsOBP20

MLVINATDYDIEGYGTGNMGEKLLTSVPRPASSNNINNDTSRTRRSEPLLKPDLDQCLSQCVFANLQVDS  
RGIPREAELWNKVQSSVTSQQRSALHDQIRACFQELQSEAEDNGCSYSNKLRLMLRFSRDRKVEGKASTPKP  
ASTEQS\*

>AipsOBP21

MLKFSVVCLYFVAAVNFVNVHCISEDEKKAFFIEAMKPMVEECGSDCGLTEEDYKHKHSGEDMDPCFKKMM  
QKLGFLDEDGKYNRKQLHESISEYTGDKDEAKRVQEQLDSCFDANGDNDGDDEESQMKRVDVLFKCLKEIKE\*

>AipsOBP22

MSMWFRAMVVVGALAAARCGVVMDEMAELARMVRESCVDETGADVKLVEAVNGGADLMEDDKLKYI  
KCTMETAGMMSDGEVDIEAVMALLPPEMAEHNGPALKSCGTQRGADDCDTAWKTQVCWQNANKAEYFLI\*

>AipsOBP23

MSKFTYLVLCFVAVSRVYANEDERAFAFHEAAKPILVECSKENGVSFDKLLAAKEAGSADGIDPCFFSVCVFKKTGVF

NSKGFDFLDNSLTKLKEFVSNDEYAKVAEVGKKCESVNEKDVSDGEAGCERASLLTACFLEHRAEIPV\*

>AipsOBP24

MAKLLLAMILVTMFTALTMSATTKDAGTKEAIMTTTTVANQDSSIDSNDVDVLAVMNVNENEFRIEMSYIQALN  
ESGSFVDETDKTPKCFIRCVFENVGIVSEDGRMFNPARAAVIFAGERNGKPMDDIADMTALCAADRKETPCD  
RSYQFLRCLMSMEIEREYKS\*

>AipsOBP25

SRKLREAMRPIIEQCSKEHGVTDADIQASKDSNNAASLPDCFNHCLFEKSGFIDKNGRYDRDSGLKNLSKYLKD  
VNQYNKVVEVTKECASVEEKPATGCELGTRLTACLLDHQTSILI\*

>AipsOBP26

MSKFTCIVLFFVAASLTKVTQAVSEEEKAVAREAMAPILAECSKAEGVSDIEDIEEAKKNPSVDAVNCSFIRCVMR  
KTDALNEKGLFSDAALAKIRPFVKSDDEFKFEIGKACMSVNDKEVSDGEAGCDRAKLLACFLEHKAEMLY  
\*

>AipsOBP27

DSAISADAESRCRNPPPTAPQKIERVITLCQDEIKLSILREALDVIKEEHTMPAQRRRDKREVPFTHDEKRIAGCLLQ  
CVYRKVKAVDGYGFPTLEGLVGLYSDGVNERGYFMAVLEASRECLMKNHDKFSRTMPMDNGRNCDSVDFIFE  
CISDRIGEYCGTSGL\*

>AipsOBP28

MTHIFSSFIPYMITVSMFSPVSVKIIISPTVPVTVVSSSVIITFMFDMYRLVLSIVAVTTVVADTDLQECRRLVHPH  
SMRCKKSADAKEKMMKNDDLKECFDLPKDPVKEHELMAKKGITTSDDKLDKAKFEEVTKDIDDKDLVA  
DIKANCINGDLTKYPPDFCFVVKMRHCMSMQILNHCTEWNDFGDCPQLKSIIGDCVKLVAA\*

>SlitOBP9

MCLVKYHVLVLCVILVGSYALNCRSSGGPKEAELKNYKCKLKMQEGKNSSKGNSAQDWKEPRVQIQRNDWD  
RGRVGSKENKNSRDDSRSKDKKGDGMRDNRNDMMSSRRDDMMSRGDERNDNRKHRTDDRMGNDN  
DRSGNRGRGNKNNRNDMNGGRDDRFGRDDYFNGREDFPQSDYEGGDMGQYNNNNYSTTQSSRRYKRER  
RPSNSGQRSQYNPNNHKISGYEDNFRSDERNTDNNSSKETDNKSCALHCFLENLEMTGEDGMPDRYLVTH  
AITKDVKNEDLRDFLQESIEECFQILDNENTEDKCEFSKNLLICLSEKGRANCDDWKDDLTF\*

>SlitOBP10

MVRKISGLLCCLVFGISFSDSAISADSESRCRNPPPTAPQKIERVITLCQDEIKLSILREALDVIKEEHTMPAQRRR  
DKREVPFTHDEKRIAGCLLQCVYRKVKAVDGYGFPTLEGLVGLYSDGVNERGYFMAVLEASRECLMKNHDKFS  
RTVPMMDNGRNCDSVDFIFECISDRIGEYCGTSGL\*

>SlitOBP11

MKSFVVCIVFVVGVCATEKGNKIASCEKESGVKSDVLAEAKKGNLGDPAFKEFTYCFKVKVIGGEDGKLN  
DVAIAKLPSGVDKAEAEKLLDSCSKTKGDAVETVYEIFKCYQHGTKSHIMFAS\*

>SlitOBP12

MKTLFVFAACILLAQALTDEQKEKLRTECLTETKVDEELVNKLGKGDYKMDNEALKKYALCMMMSELM  
TKDGKFKKDALAKVNPADKPTVEKLIDACLANKGNTPHQTAWNYVKCYHEKDPKHAIFL\*

>SlitOBP13

MITSCLLVLSAVVQVLLAKQPVFESGPPEPWGPPERTSHPGQFQPRVPKRCWVPPQRINVYNCCPIPTLYPDE  
DMQSCGFELSENKPKPVYRPEGTCKEGYCVMGKFDLLLANNVSDYVKFREYLDNWAESYPEFANAIIHIAKE  
ECAQDGGPEVPPICEPDKLFLCLTSTIFWNCKLRDGECAALQEHMNECKQYYTRVMAPTIKDFEVR\*

>SlitOBP14

MVKVTYIALFVVAVSLSSVQADDKNSKPEFNLDITTFQCAQKFDISEEQFSKAIMTFDASLLAPCFWS

>SlitOBP15

MYSINCFIVSILVIMFDNCFVYSMTREQIKNSGKLIKKTCSAKNDLTEDEVKDVDKGKFIKKDFMCIACVYK

MGQSVKGSTINHDMMLRQVDMMPNDMKAPVKS AIEHCRPVAKNYKDLCEASYWTAKCIYDFDPANFMF  
P\*

>SlitOBP16

MYRFVILSIVLVSALADDIDIRECGRIFHPPPHGCCKANNAVKNKDM LAEELKDCFDGSGPKDPMKCEIDL CIAK  
KKG FATDDGKLDIKKFEEVITKEVGS DKDLLDEIKTNCINGDLNNYGPPEFCDFMKIKHCVTLHMMNHCSEWS  
DDGNCKVVKELVGKCAKVI\*

>SlitOBP17

MKTRFLLCCILSIFLFFDQSYGMTRQQLKNSGKLMKKSCMPKNDVTEDEVGDIEKGKFIETRNVMCYIACVYT  
MSQVVKNNKLSYEAVIKQVDVMFPAEMRDAVKAATHCKETTKKYKDLCESSYWTAKCMYDYDAQNFVFP  
\*

>SlitOBP18

MFKLCVFLALGFVACHGAPNSSPGTPNANPGTYCGVTPDNIYRCLNNPRVVTPEVSTKCGSQFTECEKMT CIF  
RELKWSKRG AIDKAKV RAYFDQYETEHP EWAQAVQHVKAFCLASELRAQGVFLNCPAYDIMQCVLASFIKHA  
SPSVWSTATDCAYPKAYAADCPVCPSPDCYSPQIPFGSCNACYTQPRTV\*

>SlitOBP19

MFRRLLLLFSIIYISACNGQTEAPEKNRMMGIDAVHDNNVKIDKDTIITRNLKLEKRSRGPKSVSNKNEDQIEPD  
WSYANFPKEVSEHVEKFKNMTECLKEVQTS DKRPVKRLSPKMESPVHGECL IACVLKRNQVIINGKVNKDNL I  
ALVSKFYKDRMLMKLEKNLDRCIEMSVRAQDDCALALVLNDCTNDLMASNKHKIMVNY\*

>SlitOBP20

MEKILIFTITLSGFAHARISV MYAHDKLSDLVAQQCLSEMYPKNKRIEIQESDEPCIIFCVLKKFGIISASGVINLDI  
YRKRQVIAHQLDQKTSIMDYGGSCMENA EATQHKQDVCKKAKVFNDCTHLYRILLM\*

>SlitOBP21

MARRQRGAMFTEALPLFVILVAVTHGGKNKPVFSDEIKEIQTVHDECVAKTGVAEEDITNCENGIFKEDAKLK  
CYMFCLLEEASLVDDDDTVDYDMLVSLIPDEYERTTKMIFACKHLDTDPDKDRCQRAFEVHKCSYEKDPDLYFL  
F\*

>SlitOBP22

MSKFTCIILCVVAASLTKVSHA AVTEEEKEAFREAMAPIIAECSEEHGVSEADIKAAKESASADNIKPCFLGCVMK  
KIEVLDAKGLYDAETGLGKLRKFVKDDDEF AKFEDI AKKCLKVND ESVSDGEAGCDRAKLV LGCFIEHKVEMPF\*

>SlitOBP23

MAKFSCLVLCVVAASLSI HVASGESLRESLRPVIVACSQEHGVTDAEIQA AKDAGSPASIKPCFIACVFKAGFI  
NEQGQLDLETGLKNLRQFVKDDEYK KLEEVAKKCSQVKDKAVSDGAAGCERGVLLAGCFLEHKTSIII\*

>SlitOBP24

CVYKTEFLNSKGEYDVDTALAKLKKYISNDDDYAKLSQVGKDCASVNSKPVGDGEAGCERGVLLTQCFLDHK

>SlitOBP25

MAKVTCIVL FVVGVSLSSIQADDGKNESEVEIDVNQIIDDCEIYHIPRRLFLAAAETGSTHALTPCFWSCCFKGV  
GVLNSEGQYDIDATLDLSKKIFTDHEYEKVEIIVKKCESVNGAPVSNNGNIECEKSVLLADCLFDNAKHFPMFG  
VDY\*

>SlitOBP26

CFLACMMKQIGVMDDNGMVQKETALEMAKAVFDDPEELKAIEDYLHSCSHINTESVSDGAAGCERAMLAYK  
CMTENASKFGFDI\*

>SlitOBP27

MYKFVILCSIFVAASNADVAQTLTKRET KASLPLSVCCDIPELADEFQLAKCSPPPGPCEDVQCIFEVSGFLTD  
RNTLNKAAYRSHLQKWEKNHPGWTD SIYKAITDCVDNDPRQHLEVPCKAYDVFTCTGIAM LKKCPDTAWKC  
\*

>SlitOBP28

MIVRFLLCLYIVEFYGAHARTDQEIKAWFFREGMDCNIEHPISPKEMLELKENKIPDTNNAKCFVACVFKKTGM  
LDSKGMFDAENSIAMTQKDFANDPNRLESSKLLACKKVNDEAVSDGEGKGCERSVLLHKCFVETAPQLGIKLP  
\*

>SlitOBP29

MWNLLVVFLAICSCVYARRRSGAEINGLTEELKMEFTKLIMKCNKDGEVDMTELVQLQNYVVPTKQSTKCV  
LACAYKAAEVMNAKGEYDIDHAYKVAEMMKNGDEKRLVNAKKMADLCVKVNELSVSDGEGKCDRAAMIFK  
CTVENAPKFGFKL\*

>SlitOBP30

ALSMDDLKQKYVDNILECSKQYPIDRADAEQLQNRIMPDKKEPIKCLFACVYKLAGMMNDQG

>SlitOBP31

RNEHREKEKMNKLTNIFASILFVLSFAFYLTISFTPLTKDEQMERYNKMTENVEPFRKNLTECARQVKASMAD  
VENFMKRIPQASLQGKCFVACILKRNSIIKNNKISKEHLLEANRA

>SlitOBP32

RIDRNDIPCIHCVLKKFGIMTNDGYINIKNYRRVQAIHRYDPRILISDVGETCAQNINGMNLHDVCKKAKVF  
NDCTQLYAVSYRDPDEWK\*

>SlitOBP33

MTCSQALALLALVAISQQATTGCKNCIMLGKEEKAMFRAHSDACVAASRVEPRLVDAMLAGELLDEPALRKH  
VYCVLLKCKLISKDGKQLQKAAVLGKMAARPDKNATKVLSCADQTGDTPEDLAWNLFRCGYDKKALLFDYM  
PTNVASETDNNS\*
